1 **Non-canonical autophagy in dendritic cells restricts cross-presentation and anti-tumor**  
2 **immunity**

3  
4 Payel Sil<sup>1</sup>, Fei Zhao<sup>1</sup>, Ginger W. Muse<sup>1</sup>, Sing-Wai Wong<sup>1</sup>, Joseph P. Kolb<sup>1</sup>, Laura Miller DeGraff<sup>1</sup>,  
5 Charles J. Tucker<sup>2</sup>, Erica Scappini<sup>2</sup>, Annelise G. Snyder<sup>3</sup>, Sara Grimm<sup>4</sup>, Andrew Oberst<sup>3</sup>, and  
6 Jennifer Martinez<sup>1,5</sup>

7  
8 <sup>1</sup>Immunity, Inflammation, and Disease Laboratory, National Institute of Environmental Health  
9 Sciences (NIEHS), National Institutes of Health (NIH), Research Triangle Park, NC 27709, USA

10 <sup>2</sup>Signal Transduction Laboratory, Fluorescence Microscopy, and Imaging Center, National  
11 Institute of Environmental Health Sciences (NIEHS), National Institutes of Health (NIH), Research  
12 Triangle Park, NC 27709, USA

13 <sup>3</sup>Department of Immunology, University of Washington, Seattle, WA 98109, USA.

14 <sup>4</sup>Division of Intramural Research, National Institute of Environmental Health Sciences (NIEHS),  
15 National Institutes of Health (NIH), Research Triangle Park, NC 27709, USA

16 <sup>5</sup>Corresponding Author

17 \*Correspondence:

18 Jennifer Martinez, PhD  
19 111 TW Alexander Dr., Rall Building, Room D248A  
20 Research Triangle Park, NC 27709  
21 USA

22 Phone: (984) 287-4089

23 Email: [jennifer.martinez3@nih.gov](mailto:jennifer.martinez3@nih.gov)

24

25

26 Keywords: autophagy, Rubicon, LC3-associated phagocytosis, cross-presentation, inflammation

27

28

29

30

31

32

33

34

35

36

37

38

39

40

41 **Summary**

42 Major Histocompatibility Complex I (MHC-I) molecules classically present peptides derived from  
43 endogenous antigens, but exogenous antigens can also gain access to the MHC-I machinery in  
44 dendritic cells (DCs), which can activate antigen-specific CD8<sup>+</sup> T cells. This process, termed  
45 cross-presentation, can be triggered by the uptake of dying autologous cells, including tumor cells,  
46 by DCs. The molecular mechanisms that underlie efficient cross-presentation remain largely  
47 uncharacterized, and an improved understanding of these mechanisms might reveal novel  
48 strategies for anti-tumor therapies. Rubicon (RUBCN) is a molecule required for LC3-associated  
49 phagocytosis (LAP), but dispensable for canonical autophagy, and mice lacking this protein  
50 develop an autoimmune inflammatory pathology with age. Here, we demonstrate that *Rubcn*-  
51 deficient DCs have increased retention of engulfed cellular cargo in immature phagosomes  
52 resulting in increased phagosome-to-cytosol escape and antigen access to proteasome-mediated  
53 degradation. As a result, mice selectively lacking *Rubcn* in DCs mount stronger tumor antigen-  
54 specific CD8<sup>+</sup> T cell responses and exhibit decreased tumor burden compared to wild type  
55 littermates. These findings identify LAP as a key regulator of cross-presentation and suggest that  
56 targeting RUBCN might represent a novel strategy for anti-tumor therapy.

57

58

59

60

61

62

63

64

65

66

67

68

69

70

71

72

73 **Introduction**

74

75 The ability of the immune system to distinguish between self and non-self is integral to maintaining  
76 homeostasis and eradicating exogenous threats. Antigen-presenting cells (APCs), specifically  
77 DCs, educate the host's adaptive immune response in a controlled and antigen-specific manner.  
78 CD8<sup>+</sup> T cells are activated by peptides generated from intracellular antigens and presented in the  
79 context of MHC-I. Peptides derived from healthy self-antigens presented to CD8<sup>+</sup> T cells in the  
80 periphery elicit a minimal or absent response, as CD8<sup>+</sup> T cells expressing T cell receptors (TCRs)  
81 that recognize self-antigens undergo negative selection in the thymus prior to their population of  
82 the periphery (Rock et al., 2016). However, when cells are infected by virus or are transformed  
83 by an oncogene, they can produce proteins that are not considered self, such as virus-encoded  
84 proteins, and the presentation of these aberrant antigens via MHC-I activates a robust CD8<sup>+</sup> T  
85 cell response (Hansen and Bouvier, 2009). Therefore, the MHC-I pathway represents an  
86 evolutionarily conserved mechanism that serves as a quality control mechanism for endogenous  
87 proteins and viral defense (Kaufman, 2018).

88

89 As the activation of CD8<sup>+</sup> T cells is largely limited to their localization within secondary lymphoid  
90 tissues, they must rely on the migration of patrolling APCs to deliver antigens to them (Hansen  
91 and Bouvier, 2009). Classically, exogenous antigens are sensed as foreign, phagocytosed,  
92 processed by the endosomal-lysosomal network, and loaded onto MHC-II molecules to stimulate  
93 antigen-specific activation of CD4<sup>+</sup> T cells (Rock et al., 2016). Cross-presentation is a mechanism  
94 by which DCs can traffic exogenous antigens, such as autologous dying cells, acquired during  
95 surveillance to the MHC-I pathway for the activation of the CD8<sup>+</sup> T cell response (Cruz et al.,  
96 2017). Specific subsets of DCs, such as CD8 $\alpha$ <sup>+</sup> DCs, are the primary executors of cross-  
97 presentation (Pooley et al., 2001), as they retain phagocytosed material in less degradative  
98 compartments for longer periods than other phagocytes, allowing for limited proteolysis and  
99 prolonged preservation of antigen integrity (Belizaire and Unanue, 2009). Macrophages, for

100 example, quickly degrade intraphagosomal cargo via efficient maturation of the endocytic  
101 compartments, therefore limiting their cross-presentation capacity (Savina and Amigorena, 2007).  
102 Cross-presentation is specifically critical for the immunologically mediated clearance of tumors,  
103 and mice deficient in cross-presentation fail to generate a tumor-specific CD8<sup>+</sup> T cell response  
104 and display significantly increased tumor burden (Cruz et al., 2017; Fehres et al., 2014; Huang et  
105 al., 1994; Wolfers et al., 2001). Thus, the efficacy of MHC-I to mediate delivery of both self-made  
106 and exogenously acquired antigens to CD8<sup>+</sup> T cells highlights the importance of cytotoxic T cell  
107 activity in mitigating a multitude of pathological threats.

108  
109 Exogenous antigens can access the MHC-I machinery via two pathways – the cytosolic pathway  
110 or the vacuolar pathway. In the cytosolic pathway, internalized cargo can escape the phagosome  
111 and enters the cytosol, wherein it is subjected to proteasome-mediated degradation into peptides.  
112 These peptides can then be transported to the ER by transporter associated with antigen  
113 processing (TAP1/2), where further processing by ER aminopeptidase 1 (ERAP1) and eventual  
114 loading onto the MHC-I molecule occurs. Peptide-MHC-I complexes are then transported to the  
115 Golgi apparatus and shuttled to the plasma membrane. In the vacuolar pathway, however,  
116 peptide generation, processing, and loading onto MHC-I molecules occurs exclusively within  
117 endocytic compartments in a proteasome- and TAP1-independent manner (Cruz et al., 2017;  
118 Fehres et al., 2014; Joffre et al., 2012).

119  
120 Recent work has highlighted the activity and phagosomal trafficking of Sec22b protein during both  
121 the cytosolic and vacuolar pathways of cross-presentation, and the absence of Sec22b results in  
122 compromised cross-presentation (Alloatti et al., 2017; Cebrian et al., 2011). In DCs, Sec22b  
123 translocates to the cargo-containing phagosome and regulates the transport of ER and ER-Golgi  
124 intermediate compartment (ERGIC) proteins to the phagosome. Mechanistically, Sec22b-  
125 mediated recruitment of ERGIC proteins promotes the export of intraphagosomal cargo to the

126 cytosol and delays maturation of the cargo-containing phagosome (Alloatti et al., 2017; Cebrian  
127 et al., 2011). In some cases, proteasome-generated peptides can be re-introduced to the  
128 phagosome via Sec22b-mediated delivery of ERGIC proteins, like TAP1/2, and signaling via Toll-  
129 like receptors (TLRs) during cross-presentation can facilitate the translocation of MHC-I to the  
130 phagosome, where the peptide-MHC-I complexes are assembled and transported to the plasma  
131 membrane independent of the Golgi apparatus (Nair-Gupta et al., 2014).

132  
133 Despite recent advances in our understanding of cross-presentation, neither the relative  
134 contributions of each pathway nor the signals that mediate the recruitment and activity of key  
135 components are fully understood. We and others have described a unique form of non-canonical  
136 autophagy that couples phagocytosis to the autophagy machinery, termed LAP (Martinez et al.,  
137 2011a; Sanjuan et al., 2009). LAP, but not canonical autophagy, requires the activity of Rubicon  
138 (RUBCN), a protein that binds and regulates both the Class III PI3K complex and the NOX2  
139 complex, both of which are essential for LAP (Martinez et al., 2015). Cargo-containing  
140 phagosomes are decorated with lipidated LC3 to form the LAPosome, which can then fuse to  
141 lysosomes for proper processing and degradation of the phagocytosed material (Martinez et al.,  
142 2011a). *In vitro* studies reveal that *Rubcn*<sup>-/-</sup> macrophages phagocytose normally, but fail to  
143 translocate LC3-II to the phagosome. This defect results in cargo persisting in immature  
144 phagosomal compartments and increased production of pro-inflammatory mediators, such as IL-  
145 6 and IL-12 (Martinez et al., 2011a; Martinez et al., 2016b). As one of the most ubiquitous sources  
146 for cross-presented antigens is dying cells and engulfment of dying cells during efferocytosis is a  
147 trigger for LAP, we hypothesized that LAP played a role in regulating cross-presentation.

148  
149 *Rubcn*<sup>-/-</sup> mice are a valuable tool to allow the study of LAP-dependent mechanisms and  
150 pathologies without confounding deficits in the canonical autophagy pathway (Martinez et al.,  
151 2016b; Martinez et al., 2015). Broadly, LAP is a regulator of immunotolerance during the

152 clearance of dying cells (efferocytosis), and *Rubcn*<sup>-/-</sup> mice develop systemic lupus erythematosus  
153 (SLE)-like autoimmunity and autoinflammation with age, which is associated with defective  
154 processing of dying cells (Martinez et al., 2016b). Interestingly, aged *Rubcn*<sup>-/-</sup> mice exhibit  
155 increased levels of activated CD8<sup>+</sup> T cells in their periphery, suggesting that LAP deficiency could  
156 confer an increased capacity for MHC-I cross-presentation (Cunha et al., 2018; Martinez et al.,  
157 2016b). Here, we show, both *in vivo* and *in vitro*, that *Rubcn*<sup>-/-</sup> DCs can cross-present antigens  
158 more efficiently than wild type DCs, resulting in increased CD8<sup>+</sup> T cell proliferation and activation.  
159 We also demonstrate that the engulfed cargo persists within less degradative phagosomes in the  
160 absence of RUBCN. These phagosomes are enriched for RAB5A and Sec22b, and phagosome-  
161 to-cytosol escape is significantly increased in *Rubcn*<sup>-/-</sup> DCs, compared to wild type DCs. This  
162 increased capacity for cross-presentation translates into a more robust CD8<sup>+</sup> T cell response to  
163 tumor antigens and decreased tumor burden. Taken together, we have identified LAP as a key  
164 mechanism that regulates cross-presentation in DCs, emphasizing its importance in maintaining  
165 homeostasis and limiting immune activation.

166

## 167 **Results**

### 168 ***Rubcn*<sup>-/-</sup> DCs display enhanced cross-presentation capacity.**

169 To explore the role of LAP in cross-presentation, we generated bone-marrow derived DCs using  
170 recombinant Flt3L from both *Rubcn*<sup>+/+</sup> and *Rubcn*<sup>-/-</sup> mice (Brasel et al., 2000) (**Figure S1A-B**). On  
171 day 6-8, DCs was analyzed by FACS analysis, and cultures over 75% CD11c<sup>+</sup> CD103<sup>+</sup> CD8 $\alpha$ <sup>+</sup>  
172 were used for *in vitro* experiments. Upon co-culture with apoptotic B16 melanoma cells  
173 expressing membrane bound ovalbumin (B16-OVA), *Rubcn*<sup>-/-</sup> DCs had significantly increased  
174 levels of the OVA<sub>257-264</sub> peptide (SIINFEKL) presented in the context of MHC-I (H2-K<sup>b</sup>-OVA<sub>257-264</sub>)  
175 in a dose-dependent manner, compared to *Rubcn*<sup>+/+</sup> DCs (**Figure 1A**). This increase was  
176 dependent on phagocytosis, as upregulation of H2-K<sup>b</sup>-OVA<sub>257-264</sub> expression was abolished when  
177 co-culture was performed at 4°C (**Figure S1C**). Increased expression of H2-K<sup>b</sup>-OVA<sub>257-264</sub> in

178 *Rubcn*<sup>-/-</sup> DCs was not due to an increase in total H2-K<sup>b</sup> (MHC-I), as both *Rubcn*<sup>+/+</sup> and *Rubcn*<sup>-/-</sup>  
179 DCs increased total H2-K<sup>b</sup> expression equivalently and in a phagocytosis-dependent manner  
180 (**Figure 1B, Figure S1C**). While studies have demonstrated that DCs deficient for *Atg5* or *Atg7*  
181 exhibit reduced recycling of MHC-I molecules, resulting in increased MHC-I antigen presentation  
182 (Loi et al., 2016), our data suggests that *Rubcn*-deficiency has no effect on total MHC-I  
183 expression, but rather enhances cross-presentation specifically. Transcriptional analysis via  
184 RNA-seq revealed that upon co-culture with apoptotic Jurkat cells, *Rubcn*<sup>-/-</sup> DCs upregulated  
185 components of cross-presentation (such as *Canx*, *Ciita*, and *Erap1*) and activation machinery  
186 (such as *CD40* and *CD86*), more robustly than *Rubcn*<sup>+/+</sup> DCs (**Figure 1C**). Similar to flow  
187 cytometric analysis, *H2k1* expression was equivalent in *Rubcn*<sup>+/+</sup> and *Rubcn*<sup>-/-</sup> DCs (**Figure 1C**).  
188 We used qPCR to confirm an upregulation of transcriptional activity at 6 hours post-stimulation  
189 and observed that *Rubcn*<sup>-/-</sup> DCs displayed increased expression of *Tap1*, *Tap2*, and *B2m*,  
190 compared to *Rubcn*<sup>+/+</sup> DCs (**Figure S1D**). While *Rubcn*<sup>+/+</sup> and *Rubcn*<sup>-/-</sup> DCs had equivalent levels  
191 basally, *Rubcn*<sup>-/-</sup> DCs displayed increased surface expression of CD86, a co-stimulatory molecule  
192 (Greenwald et al., 2005), in response to co-culture with apoptotic B16-OVA cells (**Figure 1D**). In  
193 addition, and similar to *Rubcn*<sup>-/-</sup> macrophages, *Rubcn*<sup>-/-</sup> DCs significantly upregulated pro-  
194 inflammatory cytokines and chemokines, compared to *Rubcn*<sup>+/+</sup> DCs (Martinez et al., 2011a;  
195 Martinez et al., 2016b). Specifically, *Rubcn*<sup>-/-</sup> DCs upregulated factors known to promote CD8<sup>+</sup> T  
196 cell recruitment (such as *Ccl2*, *Ccl3*, *Ccl4*, *Cxcl9*, and *Cxcl10*) and activation (such as *Il1b*, *Il6*,  
197 *Il12b*, and *Tnf*) (**Figure 1C, S1E**) (Rahimi and Luster, 2018; Turner et al., 2014). Consistent with  
198 previous reports (Hayashi et al., 2018), *Rubcn*<sup>-/-</sup> DCs produced less IFN $\beta$  than *Rubcn*<sup>+/+</sup> DCs  
199 (**Figure 1C, S1E**). Therefore, *Rubcn*<sup>-/-</sup> DCs significantly upregulate key mediators known to  
200 promote an inflammatory response and enhance CD8<sup>+</sup> T cell activation.

201  
202 A recent study identified a process akin to LAP, called LC3-associated endocytosis (LANDO),  
203 wherein uptake of particles during receptor-mediated endocytosis (RME) results in *Rubcn*-

204 dependent LC3-decorated, cargo-containing endosomes (Heckmann et al., 2019). Therefore, we  
205 also examined the ability to *Rubcn*<sup>+/+</sup> and *Rubcn*<sup>-/-</sup> DCs to upregulate cross-presentation in  
206 response to endocytosis of soluble ovalbumin protein (sOVA protein), a well-characterized *in vitro*  
207 model antigen for cross-presentation (Blachere et al., 2005; Burgdorf et al., 2006; Cebrian et al.,  
208 2011; Yatim et al., 2015). Similar to apoptotic B16-OVA cell co-culture, endocytosis of sOVA  
209 protein induces significantly increased expression of H2-K<sup>b</sup>-OVA<sub>257-264</sub> by *Rubcn*<sup>-/-</sup> DCs, compared  
210 to *Rubcn*<sup>+/+</sup> DCs (**Figure S1F**). Importantly, both *Rubcn*<sup>+/+</sup> and *Rubcn*<sup>-/-</sup> DCs upregulated H2-K<sup>b</sup>-  
211 OVA<sub>257-264</sub> expression at equivalent levels in response to stimulation with OVA<sub>257-264</sub> peptide,  
212 indicating that cross-presentation, but not classical MHC-I antigen presentation, was increased in  
213 the absence of *Rubcn* (**Figure S1F**).

214

215 To test their capacity to activate CD8<sup>+</sup> T cells, *Rubcn*<sup>+/+</sup> and *Rubcn*<sup>-/-</sup> DCs were loaded with  
216 apoptotic B16-OVA cells, followed by co-culture with naïve CD8<sup>+</sup> T cells from OT-I mice, which  
217 express a transgenic T cell receptor that recognizes the OVA<sub>257-264</sub> peptide in the context of MHC-  
218 I (Hogquist et al., 1994). OT-I T cells were labeled with Tag-it Proliferation Dye prior to the co-  
219 culture, and proliferation and activation were assessed 48 hours later. Co-culture with *Rubcn*<sup>+/+</sup>  
220 DCs resulted in a modest amount of proliferation of OT-I T cells. Consistent with higher levels of  
221 cross-presentation machinery, co-culture with *Rubcn*<sup>-/-</sup> DCs resulted in a more robust proliferation  
222 of OT-I T cells (**Figure 1E**). OT-I T cells co-cultured with *Rubcn*<sup>-/-</sup> DCs also demonstrated  
223 increased effector function, as evidenced by increased IFN $\gamma$  production (**Figure 1F**). Similarly,  
224 OT-I T cells co-cultured with sOVA protein-loaded *Rubcn*<sup>-/-</sup> DCs also demonstrated increased  
225 proliferation and effector function. No difference was in proliferation or activation was observed in  
226 OT-I T cells co-cultured with OVA<sub>257-264</sub> peptide -loaded *Rubcn*<sup>+/+</sup> or *Rubcn*<sup>-/-</sup> DCs (**Figure S1G-  
227 H**).

228



229 Both increased CD86 expression and pro-inflammatory cytokine/chemokine production can  
230 positively contribute to CD8<sup>+</sup> T cell activation (Zhang and Bevan, 2011). To determine if increased  
231 CD86 expression on *Rubcn*<sup>-/-</sup> DCs was responsible for increased CD8<sup>+</sup> T cell activation capacity,  
232 we performed OT-I : DC co-cultures in the presence of anti-CD86 blocking antibody or isotype  
233 control antibody. Isotype control antibody treatment had no effect on OT-I proliferation, while the  
234 higher dose (10 µg/ml) of anti-CD86 blocking antibody inhibited OT-I proliferation modestly with  
235 both *Rubcn*<sup>+/+</sup> and *Rubcn*<sup>-/-</sup> DCs (**Figure 1G**). However, OT-I proliferation in culture with *Rubcn*<sup>-/-</sup>  
236 DCs with anti-CD86 inhibition was still significantly increased compared OT-I proliferation in  
237 culture with wild type DCs with anti-CD86 inhibition (**Figure 1G, S2A**). To assess the role of pro-  
238 inflammatory cytokine/chemokines produced by *Rubcn*<sup>-/-</sup> DCs, we collected culture media from  
239 *Rubcn*<sup>+/+</sup> and *Rubcn*<sup>-/-</sup> DCs after 24 hours of culture with apoptotic B16-OVA cells. This  
240 conditioned media was then used in new OT-I : DC co-cultures stimulated with apoptotic B16-  
241 OVA cells. The presence of *Rubcn*<sup>-/-</sup> (KO) conditioned media in OT-I: *Rubcn*<sup>+/+</sup> DC cultures did  
242 not confer a proliferative advantage, and the presence of *Rubcn*<sup>+/+</sup> (WT) conditioned media did  
243 not inhibit proliferation of OT-I co-cultured with *Rubcn*<sup>-/-</sup> DCs (**Figure 1H, S2B**). Additionally, anti-  
244 CD86 inhibition had no effect on OT-I proliferation in conditioned media co-cultures (**Figure 1H,**  
245 **S2B**). Therefore, increased cross-presentation capacity, not increased co-stimulation or  
246 inflammatory cytokine/chemokine production, is the main contributing factor to increased antigen  
247 presentation capacity of *Rubcn*<sup>-/-</sup> DCs.

248  
249 Although multiple molecular components overlap between canonical autophagy and LAP (and  
250 LANDO), only canonical autophagy requires the activity of the pre-initiation complex, composed  
251 of ATG13, FIP200, and ULK1 (Martinez et al., 2011a). We and others have reported that *Rubcn*  
252 deficiency can result in increased canonical autophagic activity (Martinez et al., 2015). To confirm  
253 that RUBCN's effect on cross-presentation occurs independently of canonical autophagy, we  
254 examined the cross-presentation capacity of *Ulk1*<sup>+/+</sup> and *Ulk1*<sup>-/-</sup> DCs. *Ulk1*<sup>+/+</sup> and *Ulk1*<sup>-/-</sup> DCs

255 displayed equivalent expression levels of H2-K<sup>b</sup>-OVA<sub>257-264</sub> upon stimulation with either sOVA  
256 protein or apoptotic B16-OVA cells (**Figure S2C**). As such, OT-I T cells co-cultured with either  
257 *Ulk1*<sup>+/+</sup> and *Ulk1*<sup>-/-</sup> DCs proliferated similarly (**Figure S2D**), indicating that defects in LAP, not  
258 canonical autophagy, is responsible for increased cross-presentation in *Rubcn*<sup>-/-</sup> DCs. We further  
259 confirmed this finding with DCs deficient for *Atg7* from *Cd11c-Cre Atg7*<sup>fllox/fllox</sup> mice, which contain  
260 DCs deficient for both canonical autophagy and LAP (Martinez et al., 2011a; Sanjuan et al., 2009).  
261 *Atg7*-deficient DCs also display increased cross-presentation capacity as evidenced by increased  
262 expression of H2-K<sup>b</sup>-OVA<sub>257-264</sub> (**Figure S2E**) and increased OT-I T cell proliferation in co-culture  
263 (**Figure S2F**). Collectively, these data demonstrate that LAP- and LANDO-deficiency confer  
264 increased cross-presentation capacity.

265  
266 ***Rubcn*<sup>-/-</sup> DCs engulf cargo, yet retain cargo in less degradative phagosomes.** To address  
267 how the absence of LAP imparts an increased capacity for cross-presentation, we next examined  
268 the nature of the cargo-containing phagosome in the absence of *Rubcn*. *Rubcn*<sup>+/+</sup> and *Rubcn*<sup>-/-</sup>  
269 DCs phagocytosed apoptotic cells (**Figure 2A**) equivalently, so we utilized flow cytometry to  
270 analyze LC3 localization on cargo-containing phagosomal membranes. Briefly, apoptotic B16-  
271 OVA cells were labeled with PKH26 and co-cultured with *Rubcn*<sup>+/+</sup> and *Rubcn*<sup>-/-</sup> DCs that express  
272 the transgene for GFP-LC3 (Martinez et al., 2015). After four hours, DCs were harvested,  
273 permeabilized on ice with digitonin (20 µg/ml), which disrupts the plasma membrane, but leaves  
274 intracellular membranes intact (Martinez et al., 2015). GFP-LC3 translocation to the PKH26<sup>+</sup>  
275 apoptotic cell-containing phagosome was analyzed via flow cytometry by examining mean  
276 fluorescent intensity (MFI) of GFP-LC3 associated with PKH26<sup>+</sup> events (Shvets and Elazar,  
277 2009). While *Rubcn*<sup>+/+</sup> DCs translocated GFP-LC3 to apoptotic cell-containing phagosomes,  
278 *Rubcn*<sup>-/-</sup> DCs contained significantly reduced GFP-LC3 association with apoptotic cell-containing  
279 phagosomes (**Figure 2B**).

280

281 Compared to macrophages, DCs are considered more efficient at cross-presentation, as they  
282 retain engulfed cargo in less acidified compartments, allowing for longer periods of antigen  
283 integrity (Belzair and Unanue, 2009). To explore the nature of cargo-containing phagosomes  
284 in *Rubcn*<sup>-/-</sup> DCs, we utilized latex beads coated with OVA protein and performed  
285 immunofluorescence for localization of RAB5A, a marker of early endosomes, and LAMP2, a  
286 marker of lysosomes (Henault et al., 2012). Unstimulated *Rubcn*<sup>+/+</sup> and *Rubcn*<sup>-/-</sup> DCs exhibited  
287 equivalent RAB5A and LAMP2 staining (**Figure 2C**), and both genotypes displayed equivalent  
288 levels of lysosomal enzymes, including Cathepsin S (*Ctss*) which has been shown to be critical  
289 for cross-presentation (Shen et al., 2004), suggesting no inherent lysosomal defect in *Rubcn*<sup>-/-</sup>  
290 DCs (**Figure S3A**). However, LAMP2 robustly translocated to OVA-bead-containing  
291 phagosomes in *Rubcn*<sup>+/+</sup> DCs, but failed to localize with OVA-bead-containing phagosomes in  
292 *Rubcn*<sup>-/-</sup> DCs (**Figure 2C**). Rather, RAB5A localized with OVA-bead-containing phagosomes in  
293 *Rubcn*<sup>-/-</sup> DCs, indicative of their relative immaturity (**Figure 2C**). We further examined the nature  
294 of cargo-containing phagosomes in *Rubcn*<sup>-/-</sup> DCs using apoptotic B16-OVA cells labeled with  
295 pHrodo Red (Jantas et al., 2015), a pH-sensitive dye that increases fluorescence in acidic  
296 environments, such as lysosomes. *Rubcn*<sup>+/+</sup> DCs exhibited significant pHrodo Red fluorescence  
297 when co-cultured with pHrodo-labeled apoptotic B16-OVA cells, yet *Rubcn*<sup>-/-</sup> DCs displayed  
298 minimal pHrodo Red fluorescence upon co-culture, consistent with their decreased LAMP2  
299 localization at the cargo-containing phagosome (**Figure 2D**). We also observed a decreased  
300 capacity for clearance of apoptotic cells *in vitro* by *Rubcn*<sup>-/-</sup> DCs, consistent with retention of  
301 engulfed cargo in a less degradative environment (**Figure S3B**). Similar data were obtained  
302 using pHrodo-labeled sOVA protein, wherein *Rubcn*<sup>-/-</sup> DCs displayed minimal pHrodo Red  
303 fluorescence upon stimulation, suggesting that both LAP- and LANDO-deficiency results in  
304 defects in the maturation of cargo-containing vesicles (**Figure S3C**).  
305

306 Recent studies suggest that the active translocation of ERGIC-associated proteins to the  
307 phagosome via a Sec22b-mediated mechanism is required for cross-presentation. It is believed  
308 that Sec22b functions by both promoting phagosome-to-cytosol escape of the cargo, as well as  
309 inhibiting phagosomal-lysosomal maturation (Cebrian et al., 2011; Wu et al., 2017). *Rubcn*<sup>+/+</sup> and  
310 *Rubcn*<sup>-/-</sup> DCs displayed equivalent localization of Sec22b with the ERGIC marker, Calreticulin, at  
311 a resting state (**Figure 2E, Figure S3D**). In the absence of *Rubcn*, however, Sec22b co-  
312 localization with OVA-bead-containing phagosomes was significantly increased, compared to wild  
313 type DCs (**Figure 2E-F**). Taken together, these data demonstrate that *Rubcn* deficiency results  
314 in retention of phagocytosed material in immature phagosomal compartments with increased  
315 association of the pro-cross-presentation molecule, Sec22b.

316

317 ***Rubcn*<sup>-/-</sup> DCs exhibit increased phagosome-to-cytosol escape and proteasome-mediated**  
318 **generation of peptides.**

319 To examine phagosomal escape, we utilized two different approaches. In the first assay (Cebrian  
320 et al., 2011; Keller et al., 2013), *Rubcn*<sup>+/+</sup> and *Rubcn*<sup>-/-</sup> DCs were loaded with the cephalosporin  
321 derived FRET substrate, CCF4, which accumulates in the cytosol and emits a FRET signal at 535  
322 nm. Apoptotic B16-OVA cells were added to the CCF4-loaded DCs in the absence or presence  
323 of  $\beta$ -lactamase at 4°C or 37°C. Upon export to the cytosol,  $\beta$ -lactamase cleaves CCF4, resulting  
324 in a reduced 535 nm FRET signal and increased emission at 450 nm (Loi et al., 2016). Flow  
325 cytometry was used to measure the ratiometric values between both signals (450 nm : 535 nm,  
326 as a ratio of cleaved CCF4 to uncleaved CCF4) as a means of examining  $\beta$ -lactamase export to  
327 the cytosol (Loi et al., 2016). As demonstrated by increased ratio values, *Rubcn*<sup>-/-</sup> DCs exhibited  
328 increased cleaved CCF4 fluorescent signal (and a decrease in uncleaved CCF4 signal), upon co-  
329 culture with apoptotic B16-OVA cells at both 90 and 180 minutes, compared to *Rubcn*<sup>+/+</sup> DCs

330 **(Figure 3A-B)**. This increase in escape was dependent on phagocytosis, as cells cultured at 4°C  
331 displayed minimal cleaved CCF4 fluorescent signal **(Figure 3A-B)**.

332  
333 Additionally, we incubated *Rubcn*<sup>+/+</sup> and *Rubcn*<sup>-/-</sup> DCs with PKH26-labeled apoptotic B16-OVA  
334 cells, and after 4 hours, DCs were treated with a concentration of digitonin mild enough to  
335 permeabilize the plasma membrane but leave phagosomal membranes intact (Martinez et al.,  
336 2015; Repnik et al., 2016). To confirm that the mild digitonin dose (20 µg/ml) was not  
337 permeabilizing lysosomal membranes, we incubated permeabilized cell extracts with the  
338 cathepsin-specific fluorogenic substrate, Z-FR-AMC, which emits fluorescence at 460 nm upon  
339 cathepsin-mediated cleavage (Repnik et al., 2016). Permeabilization with 20 µg/ml digitonin did  
340 not results in a fluorescent signal, indicative of no cathepsin release from lysosomes **(Figure**  
341 **S3E)**. Permeabilization with a higher dose (200 µg/ml) of digitonin, however, resulted in increased  
342 cathepsin-mediated fluorescence in both *Rubcn*<sup>+/+</sup> and *Rubcn*<sup>-/-</sup> DCs, suggesting that increased  
343 concentrations of digitonin are capable of permeabilizing the membranes of intracellular  
344 structures **(Figure S3E)**. Importantly, *Rubcn*<sup>+/+</sup> and *Rubcn*<sup>-/-</sup> DCs displayed equivalent levels of  
345 cathepsin-mediated fluorescence at 200 µg/ml digitonin, and transcriptional analysis revealed no  
346 difference in total cathepsin content **(Figure S3A, S3E)**. Compared to *Rubcn*<sup>+/+</sup> DCs, *Rubcn*<sup>-/-</sup>  
347 DCs displayed significantly increased phagosomal escape of apoptotic B16-OVA cells, as  
348 evidenced by increased PKH26<sup>+</sup> fluorescence in cytosolic extracts of DCs permeabilized with 20  
349 µg/ml digitonin **(Figure S3F)**. Similar results were obtained when *Rubcn*<sup>+/+</sup> and *Rubcn*<sup>-/-</sup> DCs were  
350 cultured with Alexa Fluor 555-conjugated sOVA protein **(Figure S3G)**. Taken together, these  
351 data demonstrate the RUBCN limits phagosome-to-cytosol antigen escape during LAP (and  
352 LANDO).

353  
354 We next asked if cargo persisting in immature phagosomal compartments contributed to  
355 enhanced phagosomal escape. Chloroquine (CQ) is a lysosomotropic weak base widely used as

356 a pharmacological inhibitor of autophagic flux and LAP (Martinez et al., 2011a; Mauthe et al.,  
357 2018). Recent studies demonstrate that while other autophagy inhibitors, such as bafilomycin A,  
358 inhibit autophagy by increasing the lysosomal pH of autolysosomes, CQ functions by inhibiting  
359 autophagosome and lysosome fusion, without modulating lysosomal acidity (Boya et al., 2003;  
360 Mauthe et al., 2018). Pre-treatment of *Rubcn*<sup>+/+</sup>, but not *Rubcn*<sup>-/-</sup>, DCs resulted in increased  
361 phagosomal escape of apoptotic B16-OVA cells (**Figure S3F**) (or sOVA protein, **Figure S3G**), in  
362 a dose-dependent manner, suggesting that retention of cargo in less degradative compartments  
363 can promote phagosomal escape. Similarly, *Rubcn*<sup>+/+</sup> DCs pre-treated with CQ exhibited  
364 significantly increased capacity for cross-presentation, as evidenced by higher levels of H2-K<sup>b</sup>-  
365 OVA<sub>257-264</sub> expression in response apoptotic B16-OVA cells (**Figure 3C**), supporting the notion  
366 that inhibition of phagosomal-lysosomal fusion promotes cross-presentation. CQ treatment of  
367 *Rubcn*<sup>-/-</sup> DCs, however, had no effect on their cross-presentation ability. We observed similar  
368 results with sOVA protein-induced LANDO (**Figure S3H**), suggesting that defects in phagosomal  
369 maturation in LAP- or LANDO-deficient cells allows for increased phagosome-to-cytosol escape  
370 and hence, increased cross-presentation.

371  
372 Increased escape of engulfed cargo from the phagosome to the cytosol suggests that antigens  
373 are now accessible to proteasome-mediated degradation. While it has been reported that peptide  
374 generation can occur in the phagosomal compartments, most data indicate that peptide  
375 generation occurs primarily via the proteasome pathway (Kovacsovics-Bankowski and Rock,  
376 1995; Palmowski et al., 2006). To examine the contribution of the proteasome to increased cross-  
377 presentation in *Rubcn*<sup>-/-</sup> DCs, we pre-treated *Rubcn*<sup>+/+</sup> and *Rubcn*<sup>-/-</sup> DCs with MG-132, a potent  
378 cell-permeable proteasome inhibitor (Burgdorf et al., 2006), followed by co-culture with apoptotic  
379 B16-OVA cells. Cross-presentation by both *Rubcn*<sup>+/+</sup> and *Rubcn*<sup>-/-</sup> DCs was significantly impaired  
380 by proteasome inhibition by MG-132 in a dose-dependent manner, with a reduction in expression  
381 of H2-K<sup>b</sup>-OVA<sub>257-264</sub> (**Figure 3D**). Pre-treatment with MG-132 also significantly inhibited cross-

382 presentation induced by sOVA protein in both genotypes (**Figure S3I**). Transcriptional analysis  
383 demonstrated that *Rubcn*<sup>+/+</sup> and *Rubcn*<sup>-/-</sup> DCs had equivalent expression levels of key  
384 proteasomal subunits, basally and upon apoptotic cell co-culture (**Figure S3J**). Collectively, our  
385 data reveal that, in the absence of *Rubcn*, prolonged retention of engulfed cargo within immature,  
386 Sec22b<sup>+</sup> phagosomal compartments results in increased translocation of antigens from the  
387 phagosome to the cytosol and increased accessibility to degradation by the proteasome.

388

### 389 **Cross-presentation by *Rubcn*<sup>-/-</sup> DCs requires ER/Golgi-mediated activity.**

390 Classically, proteasome-generated peptides are loaded onto MHC-I molecules via TAP1/2 on the  
391 ER, where they can be further trimmed by ERAP1 to MHC-I-compatible lengths, if needed. The  
392 peptide-MHC-I complex (pMHC-I) is then trafficked to the plasma membrane via the Golgi  
393 apparatus (Cruz et al., 2017). Evidence exists, however, for TAP1-independent pathway, wherein  
394 proteasome-generated peptides re-enter the phagosome and are loaded onto MHC-I within the  
395 phagosome (Joffre et al., 2012; Nair-Gupta et al., 2014). Therefore, we examined whether TAP1  
396 loading of peptides at the ER and trafficking of pMHC-I via the Golgi apparatus was required for  
397 cross-presentation in *Rubcn*<sup>+/+</sup> and *Rubcn*<sup>-/-</sup> DCs. Brefeldin A disrupts Golgi-ER-mediated protein  
398 transport by inhibiting the recruitment and activity of GBF1, a guanine nucleotide exchange factor  
399 (GEF) required for ADP-ribosylation factor (ARF)-mediated protein transport between the ER and  
400 the Golgi (Garcia-Mata et al., 2003). Brefeldin A has been shown to inhibit multiple trafficking  
401 pathways, including cross-presentation (Andrieu et al., 2003; Gutierrez-Martinez et al., 2015).  
402 Treatment of *Rubcn*<sup>+/+</sup> and *Rubcn*<sup>-/-</sup> DCs with Brefeldin A drastically reduced cross-presentation in  
403 response to apoptotic B16-OVA (**Figure 3E**) or sOVA protein (**Figure S3K**), suggesting ER/Golgi-  
404 mediated protein transport is required for cross-presentation. While peptide loading onto MHC-I  
405 molecules can occur post-Golgi (Cruz et al., 2017; Joffre et al., 2012), the ability of Brefeldin A to  
406 inhibit cross-presentation, in conjunction with the upregulation of *Erap1* (**Figure 1C**) and *Tap1*  
407 (**Figure S1D**), suggests that the cytosolic pathway is the predominant process in our system.



408

409 ***Cd11c-Cre Rubcn*<sup>fllox/fllox</sup> mice display decreased tumor burden.**

410

411 The ability to mount an effective anti-tumor response requires cross-presentation of cell-  
412 associated antigens *in vivo* to elicit robust CD8<sup>+</sup> T cell activity (Alloatti et al., 2017). To investigate  
413 the role of LAP in cross-presentation, we utilized mice harboring a DC-specific deletion of  
414 the *Rubcn* gene (*Cd11c-Cre Rubcn*<sup>fllox/fllox</sup>). As controls, we used littermates that expressed the  
415 floxed *Rubcn* gene but did not express the Cre recombinase (*Rubcn*<sup>fllox/fllox</sup>) (**Figure S4A**). B16-  
416 OVA cells were injected intradermally into *Rubcn*<sup>fllox/fllox</sup> and *Cd11c-Cre Rubcn*<sup>fllox/fllox</sup> mice, and  
417 tumor growth and intratumoral immune infiltration and activation were monitored. DC-specific  
418 deletion of *Rubcn* resulted in significantly delayed tumor growth (**Figure 4A**) and significantly less  
419 tumor burden (**Figure 4B, S4B**) *in vivo*. In addition, tumors from *Cd11c-Cre Rubcn*<sup>fllox/fllox</sup> mice  
420 contained more CD45<sup>neg</sup> Zombie-UV<sup>+</sup> dead cells, compared to *Rubcn*<sup>fllox/fllox</sup> mice, suggesting  
421 increased tumor cell death (**Figure 4C**). As we observed an increase in the percentage of CD45<sup>+</sup>  
422 cells in the tumors of *Cd11c-Cre Rubcn*<sup>fllox/fllox</sup> mice (**Figure 4D**), we next examined the immune  
423 composition of the tumor (**Figure S4C**). On day 16, we observed that tumors from *Cd11c-Cre*  
424 *Rubcn*<sup>fllox/fllox</sup> mice contained more CD11c<sup>+</sup> CD103<sup>+</sup> CD8 $\alpha$ <sup>+</sup> cross-presenting DCs than tumors from  
425 *Rubcn*<sup>fllox/fllox</sup> mice (**Figure 4E**). These *Rubcn*-deficient DCs also expressed significantly increased  
426 levels of the tumor-derived OVA<sub>257-264</sub> peptide (SIINFEKL) presented in the context of MHC-I (H2-  
427 K<sup>b</sup>-OVA<sub>257-264</sub>) (**Figure 4F**). No differences were detected in percentage or activation status of  
428 tumor-associated macrophages from *Rubcn*<sup>fllox/fllox</sup> and *Cd11c-Cre Rubcn*<sup>fllox/fllox</sup> mice (**Figure S4D**).  
429 Moreover, the dLNs from *Cd11c-Cre Rubcn*<sup>fllox/fllox</sup> mice contained more cross-presenting DCs,  
430 compared to *Rubcn*<sup>fllox/fllox</sup> mice (**Figure 4G**).

431

432 We then examined the endogenous OVA-specific CD8<sup>+</sup> T cell response using MHC-I peptide  
433 tetramers of SIINFEKL, referred hereafter as Tetramer (Snyder et al., 2019; Yatim et al., 2015).  
434 Tumors from *Cd11c-Cre Rubcn*<sup>fllox/fllox</sup> mice contained significantly more Tetramer<sup>+</sup> CD8<sup>+</sup> T cells,



435 indicating that *Rubcn*-deficient DCs are more efficient at cross-presentation of tumor-derived  
436 antigens (**Figure 4H**). These OVA-specific CD8<sup>+</sup> T cells were more activated, as evidenced by  
437 increased expression of CD69, and more functional, as evidenced by increased production of  
438 IFN $\gamma$ , TNF $\alpha$ , and Perforin (**Figure 4I**). Similarly, dLNs from *Cd11c-Cre Rubcn<sup>fllox/fllox</sup>* mice also  
439 contained more Tetramer<sup>+</sup> CD8<sup>+</sup> T cells that displayed a more activated phenotype, compared to  
440 dLNs from *Rubcn<sup>fllox/fllox</sup>* mice (**Figure 4J**). These trends continued, wherein tumors from *Cd11c-*  
441 *Cre Rubcn<sup>fllox/fllox</sup>* mice contained DCs with increased expression of H2-K<sup>b</sup>-OVA<sub>257-264</sub> (**Figure S4E**)  
442 and more activated Tetramer<sup>+</sup> CD8<sup>+</sup> T cells (**Figure S4F**) at day 22. Overall, these studies  
443 demonstrate that *Cd11c-Cre Rubcn<sup>fllox/fllox</sup>* mice are able to cross-present tumor antigens more  
444 efficiently and mount a more robust tumor-specific CD8<sup>+</sup> T cell response, resulting in reduced  
445 tumor burden.

446

## 447 **Discussion**

448 The most abundant source of antigen for cross-presentation is the host, as host cells undergo a  
449 continuous cycle of death and homeostatic clearance. In this regard, the MHC-I pathway serves  
450 as necessary quality control of the state of self, facilitating the presentation of both endogenous  
451 proteins and antigens derived from exogenously acquired dying cells during efferocytosis.  
452 Whereas presentation of peptides generated from healthy cells elicits only a modest CD8<sup>+</sup> T cell  
453 response (as these highly autoreactive T cells undergo negative selection in the thymus),  
454 presentation of peptides from cells undergoing stress, such as transformation or viral infection,  
455 can result in a robust CD8<sup>+</sup> T cell response (Cruz et al., 2017). Efficient activation of CD8<sup>+</sup> T cells  
456 via cross-presentation, however, can be a double-edged sword. Defects in cross-presentation  
457 results in decreased anti-tumor responses and increased tumor burden (Alloatti et al., 2017).  
458 Conversely, heightened cross-presentation is associated with increased autoimmunity, as self-  
459 antigens are presented to and activate CD8<sup>+</sup> T cells more readily (Calderon and Unanue, 2012;

460 Ji et al., 2013). Thus, control of the cross-presentation pathway is a critical node in preserving the  
461 balance between homeostasis and inflammation.

462

463 Here, we demonstrate that a form of non-canonical autophagy, LAP, and its related process,  
464 LANDO, function to restrict cross-presentation in DCs. Mechanistically, we describe that LAP  
465 functions as a negative regulator of cross-presentation by promoting the maturation of the cargo-  
466 containing phagosome to limit phagosome-to-cytosol escape and antigen access to the  
467 proteasome. In the absence of *Rubcn*, which is required for LAP but not canonical autophagy,  
468 phagosomal maturation is significantly blunted, as LC3-II fails to decorate the phagosome to  
469 promote fusion with the lysosome. Within *Rubcn*<sup>-/-</sup> DCs, cargo persists in immature vesicles,  
470 which also display increased association of Sec22b, a pro-cross-presentation molecule. This  
471 results in increased phagosome-to-cytosol antigen escape, subsequent processing of antigen into  
472 peptides, and heightened presentation of pMHC-I on the plasma membrane via ER/Golgi activity.

473

474 Recent studies have demonstrated a role for ATG5 in MHC-II-mediated antigen presentation  
475 during experimental autoimmune encephalomyelitis, wherein CD4<sup>+</sup> T cell activation was reduced  
476 in *Cd11c-Cre<sup>+</sup> Atg5<sup>fllox/fllox</sup>* mice (Keller et al., 2017). This suggests that LAP is required for MHC-  
477 II antigen presentation, though studies examining *Rubcn*'s role in MHC-II antigen presentation  
478 are needed. While other studies have implicated macroautophagy (via ATG5 and ATG7) in the  
479 recycling of MHC-I molecules (Loi et al., 2016), we did not observe an increase in total MHC-I  
480 (H2-K<sup>b</sup>) expression in *Rubcn*<sup>-/-</sup> DCs at the transcriptional or protein level. As RUBCN can also  
481 inhibit canonical autophagy (Martinez et al., 2015), it is possible that increased autophagy  
482 conferred by the absence of *Rubcn* accounts for this difference in observations, suggesting that  
483 further studies detailing the crosstalk between these two related pathways during cross-  
484 presentation are needed.

485

486 Phagosomes from *Rubcn*<sup>-/-</sup> DCs exhibit increased Sec22b association, which serves two pro-  
487 cross-presentation purposes. Firstly, Sec22b plays a role in inhibiting phagosomal maturation.  
488 Secondly, Sec22b also promotes escape of engulfed cargo from the phagosome to the cytosol,  
489 where it is vulnerable to proteasome-mediated processing into peptides (Alloatti et al., 2017;  
490 Cebrian et al., 2011). The mechanisms by which RUBCN regulates Sec22b association with the  
491 phagosome is an outstanding question, though. It is predicted that Sec22b can directly interact  
492 with RAB5A, which is a classical marker of endosomes and immature phagosomes (Rouillard et  
493 al., 2016). Our data demonstrate that engulfed cargo persists in RAB5A<sup>+</sup> phagosomes in the  
494 absence of RUBCN, suggesting that Sec22b co-localization could be due to increased RAB5A  
495 presence. Therefore, our data demonstrate that RUBCN employs multiple strategies to limit  
496 cross-presentation and subsequent autoreactivity.

497

498 Selective inhibition of endosome-associated TAP1 results in inhibition of cross-presentation  
499 induced by high doses of sOVA protein, suggesting that ER/Golgi-mediated trafficking of pMHC-  
500 I is not required for cross-presentation in this scenario (Burgdorf et al., 2008). However, this study  
501 also demonstrated that TLR4/MyD88-mediated translocation of TAP1 to endosomes was not  
502 required for efficient cross-presentation of sOVA protein at a dose (200  $\mu$ g/ml) roughly equivalent  
503 to the dose used in our study (150  $\mu$ g/ml), suggesting that cargo can enter the cross-presentation  
504 pathway at different points (Burgdorf et al., 2008). Inhibiting ERAP1, the ER enzyme responsible  
505 for trimming peptides into an MHC-I suitable form, or IRAP1, its endosomally localized relative,  
506 each reduces cross-presentation by approximately half, with silencing both conferring an additive  
507 effect (Saveanu et al., 2009). As *Rubcn*<sup>-/-</sup> DCs demonstrated increased expression of *Tap1* and  
508 *Erap1* (but not in *Irap1*), as well as exhibited decreased cross-presentation capacity in response  
509 to Brefeldin A treatment, we hypothesize that *Rubcn*-deficiency promotes cross-presentation via

510 TAP1-dependent, ER/Golgi-mediated activity. Further studies using tools that inhibit TAP1 at the  
511 ER or phagosome are required to further define these molecular mechanisms.

512

513 In addition to the uptake of dying cells, viruses can trigger cross-presentation. While some  
514 viruses, such as human immunodeficiency virus (HIV), are cross-presented in a proteasome- and  
515 TAP-dependent manner (Maranon et al., 2004), other viruses, such as influenza A virus (IAV) and  
516 hepatitis B virus (HBV), have been reported to utilize the vacuolar pathway (Stober et al., 2002).  
517 Engagement of TLR signaling during cross-presentation is required for translocation of MHC-I to  
518 cargo-containing phagosomes, where vacuolar cross-presentation can occur (Nair-Gupta et al.,  
519 2014). Whether RUBCN plays a role in virus-initiated cross-presentation or the vacuolar pathway  
520 of cross-presentation remains to be determined.

521

522 Increased cross-presentation can also be a contributing factor to the age-related autoimmunity  
523 and inflammation observed in *Rubcn*<sup>-/-</sup> mice (Martinez et al., 2016b). Studies have linked cross-  
524 presentation to increased autoimmunity. NOD mice, which are susceptible to the development of  
525 diabetes mellitus, fail to develop invasive intra-islet insulinitis or become diabetic in the absence of  
526 MHC-I (Marino et al., 2012; Serreze et al., 1997). Compared to wild type mice, however, aged  
527 *Rubcn*<sup>-/-</sup> mice exhibit increased levels of activated CD44<sup>+</sup> CD62L<sup>-</sup> CD8<sup>+</sup> T cells in the periphery,  
528 suggesting that increased MHC-I-mediated T cell activation is present in the absence of LAP  
529 (Martinez et al., 2016b). It is possible that *Rubcn* deficiency bestows improved cross-presentation  
530 capacity in other phagocytes, including macrophages, which have been described as poor cross-  
531 presenters (Savina and Amigorena, 2007). Thus, tissue or cell type-specific *Rubcn*-deficient  
532 animals may exhibit moderate or organ-restricted autoimmune pathology.

533

534 Similar to studies utilizing myeloid cell-specific deletion of *Rubcn* (Cunha et al., 2018), mice with  
535 *Rubcn*-deficient DCs demonstrate a significant decrease in tumor burden in a xenograft model of

536 tumorigenesis, due to significantly increased cross-presentation capacity and an enhanced tumor  
537 antigen-specific CD8<sup>+</sup> T cell response. As cross-presentation by DCs is required for the  
538 effectiveness of anti-PD-1 and anti-CD137 immunotherapies in the B16 tumor model (Sanchez-  
539 Paulete et al., 2016), a combination of RUBCN inhibition and immune checkpoint inhibitors, such  
540 anti-PD-1 and anti-CTLA-4, may synergize for a more potent anti-tumor CD8<sup>+</sup> T cell response. If  
541 modulation of RUBCN activity affects the expression of PD-L1 or other inhibitory molecules on  
542 APCs remains an open avenue to explore.

543  
544 Due to their diversity, plasticity, and efficient cross-presentation capacity, DCs can be exploited  
545 as vaccines to yield improved therapeutics (Saxena and Bhardwaj, 2018). Indeed, DC vaccines,  
546 such as Sipuleucel-T, have demonstrated remarkable efficacy in the treatment of prostate cancer  
547 via the capacity of autologous DCs to mount an effective and tumor-antigen-specific CD8<sup>+</sup> T cell  
548 response (Kantoff et al., 2010). Downregulation of *Rubcn* expression or activity in DCs *ex vivo*  
549 could provide additional benefit and further boost their efficacy *in vivo*. Collectively, our study  
550 demonstrates that LAP promotes an immunotolerant response by limiting cross-presentation,  
551 potentially as a mechanism to suppress excessive activation of CD8<sup>+</sup> T cells.

552

### 553 **Acknowledgments**

554 The authors thank the animal husbandry staff at NIEHS, as well as Carl Bortner, Maria Sifre,  
555 and Kevin S. Katen of the Flow Cytometry Core (NIEHS). We would also like to thank Seddon  
556 Y. Thomas, Hideki Nakano, Thomas H. Oguin, III, Donald N. Cook, and Michael Fessler for  
557 thoughtful insights and discussions. This work was supported by the NIH Intramural Research  
558 Program 1ZIAES10328601 to J.M.

559

### 560 **Author Contributions**

561 The project was conceived by P.S. and J.M. Mouse experiments were conducted by P.S., F.Z.,  
562 J.P.K., and S.W.W. G.M., L.D., C.J.T., and E.S. provided technical assistance. S.G. provided  
563 bioinformatics support. A.S. and A.O. provided reagents and technical expertise. Writing and  
564 editing by P.S., J.P.K., G.M., and J.M.

565

## 566 **Declarations of Interests**

567 The authors declare no conflict of interest.

568

## 569 **Figure Legends**

570 **Figure 1: *Rubcn*<sup>-/-</sup> DCs display enhanced cross-presentation capacity.** Bone marrow-  
571 derived dendritic cells (DCs) were generated from *Rubcn*<sup>+/+</sup> (black) and *Rubcn*<sup>-/-</sup> (red) mice *in vitro*  
572 with FLT3-L for 7 days. **(A-B, D)** DCs were co-cultured with apoptotic B16-OVA cells (1 or 5  
573 apoptotic cells: 1 DC). Eighteen hours later, DCs were harvested for flow cytometry analysis of  
574 H2-K<sup>b</sup>-OVA<sub>257-264</sub> **(A)**, H2-K<sup>b</sup> **(B)**, and CD86 **(D)** expression. **(C)** DCs were co-cultured with  
575 apoptotic Jurkat cells (5 apoptotic cells: 1 DC). Thirty minutes later, RNA was harvested for RNA-  
576 seq. Genes with fold change (FC>1.25) compared to no stimulation and p<0.05 (ANOVA) were  
577 considered significant and entered in DAVID and R studio for further pathway analysis. Heatmap  
578 of differentially regulated antigen presentation, activation, and cytokine/chemokine machinery  
579 depicted as row z-score is shown (n=3 per genotype). **(E-H)** DCs were co-cultured with apoptotic  
580 B16-OVA cells (1 or 5 apoptotic cells: 1 DC). Eighteen hours later, loaded DCs were co-cultured  
581 with naïve OT-I CD8<sup>+</sup> T cells, labeled with Tag-it Proliferation dye. Forty-eight hours later, *in vitro*  
582 cultures were harvested for flow cytometry analysis of OT-I proliferation **(E, G-H)** or IFN $\gamma$   
583 production **(F)**. Prior to OT-I addition, DCs were incubated with anti-IgG, anti-CD86, and/or  
584 conditioned media from independent cultures for at least 1 hour **(G-H)**, as indicated. Data are  
585 expressed as mean  $\pm$  SEM. No less than three independent experiments were performed, with

586 3-5 replicates per condition. Significance was calculated using 2-way ANOVA (\*p<0.05, \*\*p<0.01,  
587 \*\*\*p<0.001).

588

589 **Figure 2: *Rubcn*<sup>-/-</sup> DCs engulf cargo, yet retain cargo in less degradative phagosomes.**

590 Bone marrow-derived dendritic cells (DCs) were generated from *Rubcn*<sup>+/+</sup> (black) and *Rubcn*<sup>-/-</sup>  
591 (red) mice *in vitro* with FLT3-L for 7 days. **(A-B)** GFP-LC3<sup>+/+</sup>DCs were co-cultured with PKH26-  
592 labeled apoptotic B16-OVA cells (5 apoptotic cells: 1 DC). After one hour, phagocytosis of  
593 PKH26-labeled apoptotic B16-OVA cells was analyzed by flow cytometry **(A)**. After four hours,  
594 DCs were harvested, permeabilized by digitonin (20 µg/ml), and GFP-LC3 fluorescence  
595 associated with PKH26<sup>+</sup> events was analyzed by flow cytometry **(B)**. **(C)** DCs were co-cultured  
596 with OVA-coated latex beads (5 beads: 1 DC) in chamber slides. Four hours later, DCs were  
597 fixed, permeabilized, stained for RAB5A (green) and LAMP2 (red), and imaged via confocal  
598 microscopy. Representative images are shown. **(D)** Apoptotic B16-OVA cells were labeled with  
599 pHrodo Red per manufacturer's instructions, then co-cultured with *Rubcn*<sup>+/+</sup> and *Rubcn*<sup>-/-</sup> DCs *in*  
600 *vitro*. Four hours later, pHrodo Red fluorescence was measured in DCs by flow cytometry, as a  
601 readout of phagosomal maturation. **(E)** DCs were co-cultured with OVA-coated latex beads (5  
602 beads: 1 DC) in chamber slides. Four hours later, DCs were fixed, permeabilized, stained for  
603 Sec22b (blue), H2-Kb (red), and Calreticulin (green), and imaged via confocal microscopy.  
604 Representative images are shown. **(F)** Signal intensity profile for Sec22b across phagocytosed  
605 beads was quantified by Fiji. Data (intensity measurements across beads) are presented as mean  
606 ± SEM (n = 10-15 cells per genotype). Flow cytometric data are expressed as mean ± SEM. No  
607 less than three independent experiments were performed, with 3-5 replicates per condition.  
608 Significance was calculated using 2-way ANOVA (\*p<0.05, \*\*p<0.01, \*\*\*p<0.001).

609

610 **Figure 3: *Rubcn*<sup>-/-</sup> DCs exhibit increased phagosome-to-cytosol escape and proteasome-  
611 mediated generation of peptides.** Bone marrow-derived dendritic cells (DCs) were generated

612 from *Rubcn*<sup>+/+</sup> (black) and *Rubcn*<sup>-/-</sup> (red) mice *in vitro* with FLT3-L for 7 days. (A-B) DCs were  
613 loaded with 1  $\mu$ m CCF4, then co-cultured with apoptotic B16-OVA in the absence or presence of  
614  $\beta$ -lactamase (2 mg/ml) for 90 or 180 minutes at 4°C or 37°C. Uncleaved CCF4 was measured by  
615 flow cytometry at an emission of 535 nm, and cleaved CCF4 was measured at an emission of  
616 450 nm. Ratios of 450 nm : 535 nm was calculated by dividing the 450 nm MFI by the 535 nm  
617 MFI from a single sample. (C) DCs were pre-treated with vehicle or chloroquine (CQ) at 1 or 10  
618  $\mu$ M for 2 hours and then co-cultured with apoptotic B16-OVA cells (5 apoptotic cells: 1 DC).  
619 Eighteen hours later, DCs were harvested for flow cytometry analysis of H2-K<sup>b</sup>-OVA<sub>257-264</sub>  
620 expression. (D) DCs were pre-treated with vehicle or MG-132 at 1 or 10  $\mu$ M for 2 hours and then  
621 co-cultured in fresh media with apoptotic B16-OVA cells (5 apoptotic cells: 1 DC). Eighteen hours  
622 later, DCs were harvested for flow cytometry analysis of H2-K<sup>b</sup>-OVA<sub>257-264</sub> expression. (E) DCs  
623 were pre-treated with vehicle or Brefeldin A at 3  $\mu$ g/ml for 2 hours and then co-cultured in fresh  
624 media with apoptotic B16-OVA cells (5 apoptotic cells: 1 DC). Eighteen hours later, DCs were  
625 harvested for flow cytometry analysis of H2-K<sup>b</sup>-OVA<sub>257-264</sub> expression. Data are expressed as  
626 mean  $\pm$  SEM. No less than two independent experiments were performed, with 3-5 replicates per  
627 condition. Significance was calculated using 2-way ANOVA (\*p<0.05, \*\*p<0.01, \*\*\*p<0.001).

628

629 **Figure 4: *Cd11-Cre Rubcn*<sup>flox/flox</sup> mice display decreased tumor burden and increased**  
630 **antigen-specific CD8<sup>+</sup> T cell activation.** 1 x 10<sup>6</sup> B16-OVA cells were injected intradermally into  
631 *Rubcn*<sup>flox/flox</sup> (black, n=5) or *Cd11-Cre*<sup>+</sup> *Rubcn*<sup>flox/flox</sup> (red, n=5) mice. (A-B) Tumor measurements  
632 were recorded every 2-4 days. Significance for A was calculated using Mantel-Cox Test, and  
633 significance for B was calculated using 2-way ANOVA (\*p<0.05, \*\*p<0.01, \*\*\*p<0.001). (C-E) On  
634 day 16 post-injection, tumors were harvested for flow cytometry analysis. Tumors were assessed  
635 for tumor cell death (Zombie-UV<sup>+</sup> CD45<sup>neg</sup>, C) and immune cell infiltration (CD45<sup>+</sup>, D). (E-F)  
636 Representative flow plots for CD11c<sup>+</sup> CD103<sup>+</sup> CD8 $\alpha$ <sup>+</sup> DCs. Percentage of and number of CD11c<sup>+</sup>



637 CD103<sup>+</sup> CD8 $\alpha$ <sup>+</sup> DCs within CD45<sup>+</sup> population (**E**); MFI of H2-K<sup>b</sup>-OVA<sub>257-264</sub> expression (**D**) are  
638 expressed as mean  $\pm$  SEM. (**G**) On day 16 post-injection, dLNs were harvested for flow cytometry  
639 analysis. Percentage of CD11c<sup>+</sup> CD103<sup>+</sup> CD8 $\alpha$ <sup>+</sup> DCs and MFI of H2-K<sup>b</sup>-OVA<sub>257-264</sub> expression are  
640 expressed as mean  $\pm$  SEM. (**H-I**) On day 16 post-injection, tumors were harvested for flow  
641 cytometry analysis. Representative flow plots for CD8 $\alpha$ <sup>+</sup> Tetramer<sup>+</sup> T cells are shown in **G**.  
642 Percentage of and number of CD8 $\alpha$ <sup>+</sup> Tetramer<sup>+</sup> T cells within CD45<sup>+</sup> population (**H**) and  
643 percentage of CD69<sup>+</sup>, IFN $\gamma$ <sup>+</sup>, TNF $\alpha$ <sup>+</sup>, and Perforin<sup>+</sup> CD8<sup>+</sup> T cells within tumor (**I**) are expressed  
644 as mean  $\pm$  SEM. (**J**) On day 16 post-injection, dLNs were harvested for flow cytometry analysis.  
645 Percentage of CD8 $\alpha$ <sup>+</sup> Tetramer<sup>+</sup> T cells and percentage of CD69<sup>+</sup> CD8<sup>+</sup> T cells are expressed as  
646 mean  $\pm$  SEM. No less than three independent experiments were performed, with 5 replicates per  
647 genotype. Significance was calculated using 2-way ANOVA (\*p<0.05, \*\*p<0.01, \*\*\*p<0.001).

648  
649 **STAR Methods**

650  
651 **Lead Contact and Materials Availability**

652 Reagents and mice used in this study will be made available under a standard material transfer  
653 agreement. Requests for resources and reagents should be directed to and will be fulfilled by the  
654 Lead Contact, Jennifer Martinez (jennifer.martinez3@nih.gov).

655  
656 **Experimental Model and Subject Details**

657 **Mice**

658 **Strains.** Age (8-12 weeks), gender, and weight-matched littermates were used as wild type  
659 controls. Mice were housed and bred in a specific-pathogen-free animal facility at the  
660 NIEHS/NIH, under the guidance of the NIEHS Animal Care and Use Committee (ACUC) in  
661 accordance with the Guide for the Care and Use of Animals.

662

663 *Rubcn*<sup>-/-</sup> mice have been previously described (Martinez et al., 2015). Conditional null (“Flox”)  
664 Rubicon mice were made from embryonic stem cells purchased from the European Conditional  
665 Mouse Mutagenesis Program (EUCOMM Project 76467). *Rubcn*<sup>flox/flox</sup> transgenic mouse strains  
666 were generated at the NIEHS animal facility and bred to *B6.Cg-Tg(Itgax-cre)1-1Reiz/J (CD11c-*  
667 *Cre*<sup>+</sup> B6, Jax stock no. 008068) mice to generate *CD11c-Cre*<sup>+</sup> *Rubcn*<sup>flox/flox</sup>.

668  
669 *Ulk1*<sup>-/-</sup> mice were provided by M. Kundu (St. Jude Children’s Research Hospital, Memphis,  
670 TN, USA) (Kundu et al., 2008). *Atg7*<sup>flox/flox</sup> mice were obtained from M. Komatsu (Tokyo  
671 Metropolitan Institute of Medical Science, Tokyo, Japan) (Komatsu et al., 2005) and bred to  
672 *CD11c-Cre*<sup>+</sup> mice to generate *CD11c-Cre*<sup>+</sup> *Atg7*<sup>flox/flox</sup>. *C57BL/6-Tg(TcraTcrb)1100Mjb/J (OT-1*  
673 *B6, Jax stock no. 003831)* mice were purchased from Jackson Laboratories (Bar Harbor, ME,  
674 USA) and were used as a source for OVA-specific CD8<sup>+</sup> T cells (described below). All mouse  
675 strains were maintained on a C57BL/6 background.

676  
677 **Xenograft tumor model.** 1x10<sup>6</sup> B16-OVA cells in endotoxin-free PBS (Thermo Fisher Scientific,  
678 Waltham, Massachusetts, USA) were injected intradermally into the shaved back of the female  
679 mice. The mice were monitored for tumor growth, and the tumors were measured using digital  
680 calipers (Mitutoyo Corporation, Kanagawa, Japan). The tumor volume was determined using the  
681 formula,  $volume = short\ axis^2 \times long\ axis \times 0.523$  (in mm<sup>3</sup>). The solid tumors and draining lymph  
682 nodes (dLNs) were harvested in complete media (DMEM+ 10% FCS+ 1% Penicillin-streptomycin)  
683 in a non-treated 6-well plate (Thermo Fisher Scientific, Waltham, Massachusetts, USA). The  
684 tumor mass was mechanically dissociated using a sharp blade, and they were then enzymatically  
685 dissociated by incubating in DMEM containing 50% Accutase (Life Technologies Corporation,  
686 Waltham, Massachusetts, USA), 1% penicillin-streptomycin and 5% collagenase/ hyaluronidase  
687 (STEMCELL Technologies Inc., Vancouver, British Columbia, Canada) for 1 hour at 37 °C. The  
688 tumor cells were filtered using 70 µm filters and washed with PBS. The single cell suspension

689 was prepared by resuspended the cells in MACs buffer (PBS with 0.5% BSA and 2mM EDTA).  
690 The cells were then finally resuspended in 80% Percoll (GE Healthcare Bio-Sciences, Pittsburgh,  
691 PA, USA) and carefully layered the 40% Percoll. Once the Percoll gradient was prepared, the  
692 cells were centrifuged at 1200 x g with no brakes at 4 °C. Finally, tumor-infiltrating immune cells  
693 were collected at the interphase of 80%-40% Percoll gradient. The cells were washed twice with  
694 endotoxin-free PBS (400 x g, 5 mins, 4 °C) and finally resuspended in MACs buffer. The dLNs  
695 were mashed in complete media, filtered using 70 µm filters, and washed twice with endotoxin-  
696 free PBS. The single cell suspension was prepared by resuspended the cells in FACs buffer.  
697 Tumor-infiltrating immune cells and dLN cells were used to perform subsequent analysis. All  
698 injected cells were subjected to and passed the NIEHS Quality Assurance Laboratory (QAL)  
699 testing prior to injection.

700

## 701 **Cell culture**

702 **Bone marrow-derived dendritic cells (DC) differentiation.** Bone marrow was extracted from  
703 the 8-12-week-old male mice. The hind legs were removed and placed in cold complete media.  
704 The muscle and connective tissues associated with the femur and tibia were removed. The bones  
705 were then flushed with cold RPMI complete media (supplemented with 10% FCS (Hyclone, GE  
706 Healthcare Bio-Sciences, Pittsburgh, PA, USA), 1% HEPES (Sigma-Aldrich Corporation, St.  
707 Louis, Missouri, United States), 1% Glutamax (Life Technologies Corporation, Waltham,  
708 Massachusetts, USA), 1% penicillin-streptomycin (Life Technologies Corporation, Waltham,  
709 Massachusetts, USA) and 50 µM tissue culture-grade β-mercaptoethanol (β-ME) (Life  
710 Technologies Corporation, Waltham, Massachusetts, USA) until they turned white. The BM cells  
711 were then passed through a 70 µm cell strainer. The cells were then centrifuged and treated with  
712 9 ml of ammonium chloride solution (STEMCELL Technologies Inc., Vancouver, British Columbia,  
713 Canada) for 10 minutes on ice to lyse the red blood cells (RBCs). The cells were centrifuged twice  
714 with endotoxin-free PBS (400 x g, 5 mins, 4 °C) and counted. Freshly isolated BM cells were

715 cultured in complete medium supplemented with 200 ng/mL of recombinant FMS-like tyrosine  
716 kinase-3 ligand (rFlt3L) (NIEHS Protein Expression Core Facility) at the density of  $2 \times 10^6$  viable  
717 cells per ml in Nunc™ non-treated flasks (Thermo Fisher Scientific, Waltham, Massachusetts,  
718 USA) at 37 °C. The media was exchanged every 2-3 days for fresh complete media with 200  
719 ng/ml rFlt3L.

720

721 On day 6-8, Flt3L-derived DCs were harvested by collecting the non-adherent DCs in a centrifuge  
722 tube. The adherent DCs were treated with 2mM EDTA (Invitrogen, Carlsbad, CA, USA) for 5 mins  
723 to harvest them and were then collected in a centrifuge tube. The DCs were washed with  
724 endotoxin-free PBS twice and plated for subsequent *in vitro* experiments. Purity was assessed  
725 by FACS analysis, and cultures over 75% CD11c<sup>+</sup> CD103<sup>+</sup> CD8α<sup>+</sup> were used for *in vitro*  
726 experiments.

727

728 **DC co-culture.** DCs were plated at  $1 \times 10^6$ /ml in triplicate in 96 well round bottom plates for *in*  
729 *vitro* experiments. Apoptotic cells (below) were used at a ratio of 1 apoptotic cell : 1 DC or 5  
730 apoptotic cells : 1 DC. Low endotoxin whole soluble OVA (sOVA) protein (Worthington  
731 Biochemical, Lakewood, NJ USA) was used at 150 μg/ml. Alexa Fluor 555-conjugated OVA was  
732 obtained from Thermo-Fisher Scientific (Waltham, MA, USA) and used at 150 μg/ml. OVA<sub>257-264</sub>  
733 peptide (Invivogen, San Diego, CA, USA) was used at 50 ng/ml. OVA (150 μg/ml) was coupled  
734 to 3-micron polystyrene beads (Polysciences Inc., Warrington, PA USA) per manufacturer's  
735 instructions. Chloroquine (CQ) was used at 1 or 10 μM to inhibit lysosomal fusion (Sigma-Aldrich,  
736 St. Louis, MO USA). MG-132 was used at 1 or 10 μM to inhibit proteasome activity (Sigma-  
737 Aldrich, St. Louis, MO USA). Brefeldin A was used at 3 μg/ml to inhibit protein transport (Thermo-  
738 Fisher Scientific, Waltham, MA, USA).

739

740 **Cell lines.** B16-OVA cells were obtained from A. Oberst at the University of Washington, Seattle,  
741 WA USA. The cells were cultured with complete DMEM media supplemented with 10% heat-  
742 inactivated fetal bovine serum (HI-FCS) (Hyclone, GE Healthcare Bio-Sciences, Pittsburgh, PA,  
743 USA), 1% penicillin-streptomycin (Penicillin-streptomycin) (Life Technologies Corporation,  
744 Waltham, Massachusetts, USA) and 500 µg/ml geneticin (Life Technologies Corporation,  
745 Waltham, Massachusetts, USA). The media was changed every 2 days. The cells were harvested  
746 by trypsinization and washed twice with endotoxin-free PBS before use. The cells were confirmed  
747 as negative for mycoplasma contamination by the NIEHS Quality Assurance Laboratory (QAL).  
748 Jurkat cells were obtained from M. Fessler at the NIEHS, RTP, NC USA and cultured with  
749 complete RPMI media supplemented with 10% heat-inactivated fetal bovine serum (HI-FCS)  
750 (Hyclone, GE Healthcare Bio-Sciences, Pittsburgh, PA, USA) and 1% Penicillin-streptomycin (Life  
751 Technologies Corporation, Waltham, Massachusetts, USA). The media was exchanged every 2-  
752 3 days for fresh complete media. The cells were harvested by collecting all the non-adherent  
753 cells, centrifuging, and washing with endotoxin-free PBS. The cells were confirmed as negative  
754 for mycoplasma contamination by the NIEHS Quality Assurance Laboratory (QAL).

755  
756 **Induction of Apoptosis in B16-OVA cells and Jurkat cells.** The cells were washed with  
757 endotoxin-free PBS 2x to remove the media and then UV treated for 20 seconds with 20 J/m<sup>2</sup> in  
758 a UV crosslinker (Fisher Scientific, Hampton, NH, USA) (Martinez et al., 2011b). The cells were  
759 then returned to the 37 °C incubator. 16 hours of post-UV treatment, the apoptotic cells were  
760 detected by Annexin V and PI staining and performing FACs analysis (Martinez et al., 2016a, b).

761  
762 **Naïve CD8<sup>+</sup> T cells isolation.** The spleens from naïve OT1 mice C57BL/6-  
763 Tg(TcraTcrb)1100Mjb/J (OT-1 B6, Jax Stock No. 003831 Jackson Laboratories Bar Harbor, ME,  
764 USA) were harvested and the CD8<sup>+</sup> T cells were extracted using EasySep™ Mouse Pan-Naïve  
765 T Cell Isolation Kit per manufacturer's instructions. (STEMCELL Technologies Inc., Vancouver,

766 British Columbia, Canada). Isolated T cells were incubated in serum-free media for 2 hours to  
767 synchronize their cell cycles. Cells were then stained with Tag it™ dye (Biolegend, San Diego,  
768 CA, USA) per manufacturer's instructions.

769

770 **T cell : DC co-culture.** CD11c<sup>+</sup> DCs were isolated from day 7 bone marrow-derived DCs (above)  
771 using EasySep™ manufacturer's guidelines from the Mouse Pan-DC Enrichment Kit (STEMCELL  
772 Technologies Inc., Vancouver, British Columbia, Canada). 1x 10<sup>5</sup> CD11c<sup>+</sup> DCs were then co-  
773 cultured with apoptotic B16-OVA cells (1 or 5 apoptotic cells : 1 DC), sOVA protein (150 µg/ml),  
774 or OVA<sub>257-264</sub> peptide (50 ng/ml) in triplicate for 18 hours in a 96 well plate. Unstimulated or loaded  
775 CD11c<sup>+</sup> DCs were co-cultured with naïve isolated 1x 10<sup>6</sup> cell cycle-synchronized, Tag it™-labeled  
776 CD8<sup>+</sup> OT-I T cells (above) for 2 days (10 T cells : 1 DC). T cell proliferation and production of IFNγ  
777 was measured by FACs after 48 hours of co-culture.

778

779 **CD86 inhibition *in vitro*.** T cell : DC co-culture was performed as described above with the  
780 following modifications. Prior to addition of OT-I T cells, antigen-loaded DCs were incubated with  
781 IgG2a isotype control antibody or anti-CD86 blocking antibody (Biolegend, San Diego, CA, USA)  
782 at 1 or 10 µg/ml for at least 1 hour. DCs were then co-cultured with naïve isolated 1x 10<sup>6</sup> cell  
783 cycle-synchronized, Tag it™-labeled CD8<sup>+</sup> OT-I T cells (above) for 2 days (10 T cells : 1 DC). T  
784 cell proliferation was measured by FACs after 48 hours of co-culture.

785

786 **Conditioned media.** T cell : DC co-culture was performed as described above with the following  
787 modifications. Prior to addition of OT-I T cells, media was removed from antigen-loaded DCs,  
788 and DCs were gently washed with PBS. Culture media was collected from independent cultures  
789 of *Rubcn*<sup>+/+</sup> and *Rubcn*<sup>-/-</sup> DCs after 18 hours of culture with apoptotic B16-OVA cells. Conditioned  
790 media from *Rubcn*<sup>-/-</sup> DCs (KO conditioned media) was transferred to *Rubcn*<sup>+/+</sup> DCs, and  
791 conditioned media from *Rubcn*<sup>+/+</sup> DCs (WT conditioned media) was transferred to *Rubcn*<sup>-/-</sup> DCs.

792 Cultures were incubated for at least 1 hour with conditioned media, prior to addition of OT-I T  
793 cells. DCs were then co-cultured with naïve isolated  $1 \times 10^6$  cell cycle-synchronized, Tag it™-  
794 labeled CD8<sup>+</sup> OT-I T cells (above) for 2 days (10 T cells : 1 DC). T cell proliferation was measured  
795 by FACs after 48 hours of co-culture.

796

## 797 **Method Details**

798

799 **Quantification of phagocytosis.** Phagocytosis was calculated using flow cytometry analysis as  
800 described in (Martinez et al., 2015). The percentage of phagocytosis equals the number of  
801 dendritic cells that have been engulfed PKH26-stained B16-OVA. Data represent a minimum of  
802 three independent experiments in which technical triplicates of 50,000 cells per sample were  
803 acquired using a Fortessa cytometer (BD, Franklin Lake, NJ, USA).

804

805 **Quantification of GFP-LC3 translocation to the phagosome.** GFP-LC3 association with the  
806 cargo-containing phagosome was assessed by flow cytometry using methods previously  
807 described (Martinez et al., 2015) (Shvets and Elazar, 2009). Briefly, apoptotic B16-OVA cells were  
808 labeled with PKH26 and co-cultured with *Rubcn*<sup>+/+</sup> and *Rubcn*<sup>-/-</sup> DCs that express the transgene  
809 for GFP-LC3. After four hours, GFP-LC3<sup>+</sup> DCs were harvested, washed once with FACS buffer,  
810 and permeabilized on ice with digitonin (20 µg/ml) for 15 minutes. GFP-LC3 association with  
811 PKH26<sup>+</sup> apoptotic cell-containing phagosomes was measured by examining mean fluorescent  
812 intensity (MFI) of GFP-LC3 of PKH26<sup>+</sup> events (Shvets and Elazar, 2009). Data represent a  
813 minimum of three independent experiments in which technical triplicates of 50,000 cells per  
814 sample were acquired using a Fortessa cytometer (BD, Franklin Lakes, New Jersey, USA).

815

816 **pHrodo labeling.** Low endotoxin OVA protein was labeled with pHrodo Red Microscale Labeling  
817 Kit (Thermo-Fisher Scientific, Waltham, Massachusetts, USA) per manufacturer's instructions.

818 B16-OVA cells were labeled with pHrodo Red AM Intracellular pH Indicator kit (Thermo-Fisher  
819 Scientific, Waltham, Massachusetts, USA) per manufacturer's instructions.

820

821 **Cell labeling with PKH26 dye.** The apoptotic cells were stained using the PKH26 Red  
822 Fluorescent Cell Linker Kits (Sigma-Aldrich, St. Louis, Missouri, USA) per manufacturer's protocol  
823 (Martinez et al., 2016a, b). The cell pellet was resuspended in 10 ml of complete medium, transfer  
824 to a fresh sterile conical polypropylene tube, centrifuge at 400 x g for 5 minutes and washed the  
825 cell pellet 2 more times with 10 ml of complete medium to ensure removal of unbound dye.

826

827 **Digitonin-based measurement phagosome-to-cytosol escape assay.** Phagosomal escape  
828 using a modified version of a previously described protocol (Repnik et al., 2016). Briefly, cells  
829 were cultured with PKH26-labeled apoptotic B16-OVA cells (5 apoptotic cells: 1 DC) or Alexa  
830 Fluor 555-labeled OVA protein (150 µg/ml). Six hours later, DCs were permeabilized with digitonin  
831 (20 µg/ml) incubating the plate for 10 minutes on ice with shaking. Membrane portions of the  
832 sample were pelleted by centrifugation (14,000 rpm, 1 hour). Cytosolic supernatant portions were  
833 collected and analyzed for fluorescence as indicated using Tecan M200 Infiniti Pro microplate  
834 reader (Tecan, Männedorf, Switzerland).

835

836 For measurement of cytosolic cathepsin, DCs were permeabilized with 20 µg/ml or 200 µg/ml for  
837 10 minutes on ice with shaking. DCs then treated with 5 mM DTT and 30 µM cathepsin-specific  
838 fluorogenic substrate, Z-FR-AMC (Sigma-Aldrich, St. Louis, MO USA) at 37°C for 20 minutes.  
839 Membrane portions of the sample were pelleted by centrifugation (14,000 rpm, 1 hour). Cytosolic  
840 supernatant portions were collected and analyzed for AMC (ex 370 nm; em 460 nm) fluorescence  
841 using Tecan M200 Infiniti Pro microplate reader.

842



843  **$\beta$ -lactamase-based measurement of phagosome-to-cytosol escape assay.** Phagosomal  
844 escape using a modified version of a previously described protocol (Cebrian et al., 2011; Keller  
845 et al., 2013). DCs were loaded with 1  $\mu$ M FRET substrate, CCF4 (Thermo-Fisher Scientific,  
846 Waltham, Massachusetts, US), which accumulates in the cytosol and emits a FRET signal at 535  
847 nm when it is uncleaved for 1 hour at room temperature in EM buffer (120mM NaCl, 7mM KCl,  
848 1.8mM CaCl<sub>2</sub>, 0.8mM MgCl<sub>2</sub>, 5mM glucose and 25mM HEPES at pH 7.3). Cells were washed  
849 once and co-culture apoptotic B16-OVA cells (5 apoptotic cells : 1 DC) in the absence or presence  
850 of 2 mg/ml of purified  $\beta$ -lactamase (Sigma-Aldrich, St. Louis, MO USA) in EM buffer with 1mM  
851 probenecid (Sigma-Aldrich, St. Louis, MO USA) for 90 or 180 minutes at 4°C or 37°C. Using  
852 flow cytometry, live, single cells were gated, and the mean fluorescent intensities of CCF4  
853 fluorescence with 450nm and 535nm emission filters was measured. Ratiometric values of both  
854 signals (450 nm : 535 nm, as a ratio of cleaved CCF4 to uncleaved CCF4) was calculated as a  
855 means of examining  $\beta$ -lactamase export to the cytosol (Loi et al., 2016).

856  
857 **qPCR.** *Rubcn*<sup>+/+</sup> and *Rubcn*<sup>-/-</sup> FLT3L-derived-BMDCs were unstimulated or co-cultured with  
858 apoptotic Jurkat cells (5 apoptotic cells : 1 DC). RNA was isolated after thirty minutes using the  
859 Trizol and RNeasy kit (QIAGEN, Hilden, Germany) according to the manufacturer's instructions.  
860 The RNA was treated with DNase (QIAGEN, Hilden, Germany) to ensure the removal of any  
861 contaminating DNA. Extracted RNA was reverse transcribed to cDNA using iScript cDNA  
862 synthesis kit (Bio-Rad Laboratories, Hercules, California, U.S.A.). Quantitative, real-time PCR  
863 was performed on the QuantStudio 6 Flex Real-Time PCR System (Applied Biosystems, Thermo-  
864 Fisher Scientific, Waltham, MA, USA) using TaqMan Universal Master Mix (Applied Biosystems,  
865 Waltham, Massachusetts, USA). *Rubcn* (Mm01170688\_g1), *Tap 1* (Mm00443188\_m1), *Tap 2*  
866 (Mm01277033\_m1),  *$\beta$ 2m* (Mm00437762\_m1), and *Actinb* (Mm02619580\_g1) TaqMan assay  
867 (Life Technologies, Thermo-Fisher Scientific, Waltham, MA, USA) were used. Expression was  
868 normalized against *Actinb* to compare target gene mRNA levels.

869

870 **RNA-seq.** *Rubcn*<sup>+/+</sup> and *Rubcn*<sup>-/-</sup> FLT3L-derived-BMDCs were unstimulated or co-cultured with  
871 apoptotic Jurkat cells (5 apoptotic cells: 1 DC). RNA was isolated after thirty minutes using the  
872 Trizol and RNeasy kit (QIAGEN, Hilden, Germany) according to the manufacturer's instructions.  
873 DNase digestion was performed to remove genomic DNA as described above. The sample  
874 concentration was measured using the Qubit RNA BR Assay kit (Invitrogen, Carlsbad, CA, USA)  
875 and the RNA quality was rechecked with Bioanalyzer 2100 (Agilent, Santa Clara, CA, USA) with  
876 RNA Pico chip (Agilent, Santa Clara, CA, USA). 250 ng of RNA was used to make RNA-seq  
877 library using Illumina's TruSeq RNA Library Prep Kit v2. The library concentration was checked  
878 using Qubit dsDNA HS assay kit (Invitrogen, Carlsbad, CA, USA) and the library's fragment size  
879 range with Bioanalyzer 2100 using high sensitivity DNA Chip (Agilent, Santa Clara, CA, USA).  
880 Then the library was then prepped for sequencing. Sequencing was performed with an Illumina  
881 NovaSeq 6000 (Illumina, San Diego, CA, USA) by the NIEHS Epigenomics Core.

882

883 Reads were generated as single-end 76mers then filtered to retain only those with an average  
884 base quality score of at least 20. Genomic mapping against the mm10 reference genome was  
885 performed by STAR v2.5 (Dobin et al., 2013) with the following parameters: --  
886 outMultimapperOrder Random --outSAMattrIHstart 0 --outfitter type BySJout --  
887 alignSJoverhangMin 8 --limitBAMsortRAM 55000000000 (other parameters at default settings).  
888 Mapped read counts per gene were determined by Subread feature Counts v1.5.0-p1 (Liao et al.,  
889 2014) with parameter -s0. Differentially expressed genes (DEGs) were identified by DESeq2  
890 v1.14.1 (Love et al., 2014) with filtering threshold FDR 0.05. Gene models for this analysis are  
891 based on mm10 RefSeq annotations as downloaded from the UCSC Genome Browser.

892

893 The heatmap views for the dataset were generated by heatmap.2 from the gplots R package (R  
894 studio, Boston, MA, USA), with row-scaling of the expression values reported by the

895 rlogTransformation function in DESeq2. Ingenuity Pathway Analysis software (Qiagen, Venlo,  
896 The Netherlands) was used for further RNA-seq data analysis. The RNA-seq data have been  
897 deposited in NCBI's GEO (<https://www.ncbi.nlm.nih.gov/geo/>) under accession GSE133945.

898

899 **Western blot.** BMDCs were harvested, and the pellets were washed twice with PBS (400 x g, 5  
900 mins, 4 °C). Cells were resuspended in 200 µl of RIPA buffer containing proteinase inhibitor and  
901 mixed thoroughly. The cells were lysed on ice for 30 minutes and vortexed for 10 seconds every  
902 10 minutes. For analysis of *Cd11-Cre*-mediated deletion, spleens from *Rubcn<sup>flox/flox</sup>* or *Cd11-Cre<sup>+</sup>*  
903 *Rubcn<sup>flox/flox</sup>* mice were harvested, and CD11c<sup>+</sup> populations were isolated using EasySep™  
904 manufacturer's guidelines from the Mouse Pan-DC Enrichment Kit (STEMCELL Technologies  
905 Inc., Vancouver, British Columbia, Canada).

906

907 Cell lysates were mixed with 2x Loading buffer, and samples were loaded onto protein gel for  
908 separation by molecular weight. Proteins on the gel were transferred onto polyvinylidene difluoride  
909 (PVDF) membranes using a Trans-Blot semi-dry transfer cell (Bio-Rad, Hercules, CA USA). The  
910 membranes were blocked with Tris-buffered saline containing 0.05% Tween 20 (TBST) and 5%  
911 bovine serum albumin (BSA) for 1 hour and incubated with primary antibodies overnight at 4°C.  
912 Membranes were washed with PBS containing 0.05% Tween 20 (PBST) or TBST and incubated  
913 with horseradish peroxidase (HRP)-conjugated secondary antibodies (Jackson  
914 ImmunoResearch, West Grove, PA, USA) for 1 hour, and the HRP on the membranes was  
915 developed with ECL Select Western blotting detection reagent and visualized using an  
916 ImageQuant LAS 4000 (GE Healthcare, Pittsburgh, PA USA).

917

918 **Flow cytometry.** Cells were resuspended in FACs buffer and blocked using anti-mouse  
919 CD16/CD32 (Biolegend, San Diego, CA, USA). Zombie UV (Biolegend, San Diego, CA, USA) or  
920 Fixable Viability eFluor™ 780 (Thermo-Fisher Scientific, Waltham, MA, USA) dyes were used to

921 stain for cell viability. Cells were stained with FACs antibodies for surface markers, then washed  
922 with FACs buffer. 50,000 cells per sample were acquired using the LSRII or Fortessa flow  
923 cytometer (BD, Franklin Lakes, NJ, USA) and analyzed using FlowJo software (Tree Star,  
924 Ashland, OR, USA). Geometric mean fluorescence intensity (MFI) was calculated for markers of  
925 DC activation, such as CD86 and H2-K<sup>b</sup>-OVA<sub>257-264</sub> (MHC-I SIINFEKL). Antigen-specific T cells  
926 were detected using H2-K<sup>b</sup>-OVA<sub>257-264</sub> Tetramer (NIH Tetramer Core Facility, Atlanta, GA, USA),  
927 For Tetramer staining, the samples were incubated with the Tetramer prepared in MACs buffer  
928 for 1 hour at room temperature, washed and before additional surface stains.

929

930 **FACs intracellular cytokine staining.** For intracellular cytokine staining, cells were incubated  
931 with 500 ng/ml PMA (Sigma-Aldrich Corporation, St. Louis, Missouri, United States), 1 µg/ml  
932 Ionomycin (Sigma-Aldrich Corporation, St. Louis, Missouri, United States), and 3 µg/ml Brefeldin  
933 A (Thermo-Fisher Scientific, Waltham, MA, USA) for 6 hours at 37°C post-surface marker  
934 staining. Cells were fixed and permeabilized in BD Cytofix/Cytoperm™ (Becton Dickinson,  
935 Franklin Lakes, NJ, USA) per manufacturer's guidelines, and stained with intracellular antibodies  
936 (Perforin, IFN $\gamma$ , TNF $\alpha$ ).

937

938 **Immunofluorescence.** BMDCs were plated and stimulated in poly-D-Lysine (1 mg/ml)-coated  
939 chamber slides. At indicated time points, cells were fixed with 4% formaldehyde for 20 minutes at  
940 4°C. Following fixation, cells were blocked and permeabilized in block buffer (1% BSA, 0.1%  
941 Triton in PBS) for 1 hour at RT. Cells were incubated overnight at 4°C with the primary antibody  
942 in block buffer. Cells were washed in TBS-Tween (Tris-buffered saline containing 0.05% Tween-  
943 20) and incubated Alexa-Fluor conjugated secondary antibodies (Thermo Fisher Scientific,  
944 Waltham, MA, USA). Confocal images were taken with a Zeiss LSM880 (Carl Zeiss Inc,  
945 Oberkochen, Germany) using the 488nm, 561nm, and 633nm laser lines for excitation paired with

946 emission filter setting of 495-558nm, 571-624nm, and 640-758nm respectively. An EC Plan-  
947 Neofluar 40X/0.9 M27 objective was used for image collection along with a pinhole setting of 3.4  
948 Airy Units which yields an optical slice of 3.2 $\mu$ m.

949

950 **Quantification of immunofluorescence.** ImageJ Fiji software (Schindelin et al., 2012) was used  
951 to quantitate the fluorescence intensity across the bead-containing phagosome. The images were  
952 imported into the Fiji software and a region of interest was selected to determine the mean  
953 fluorescent intensity. Data was compiled from 10-15 cells per treatment over three independent  
954 experiments.

955

956 **Live cell imaging.**  $1 \times 10^6$  DCs were seeded on 50  $\mu$ g/ml poly-D-Lysine ((Sigma-Aldrich  
957 Corporation, St. Louis, Missouri, USA)-precoated 35 mm, Petri dish (MatTek Corporation,  
958 Ashland, MA).  $5 \times 10^6$  PKH26-labeled apoptotic B16-OVA cells were added to the culture. The  
959 cells were maintained at  $\sim 37^\circ\text{C}$  and 5%  $\text{CO}_2$  using an environmental control chamber. Confocal  
960 images were taken with a Zeiss LSM880 (Carl Zeiss Inc, Oberkochen, Germany) using the 561nm  
961 laser line for excitation paired with emission filter settings of 571-624nm. A Plan-APOCHROMAT  
962 63X/1.4 Oil DIC objective was used for image collection along with a pinhole setting of 2.3 Airy  
963 units which yields an optical slice of 2  $\mu$ m.

964

965 **Quantification of cytokine and chemokine production.** Supernatants from DC cultures were  
966 collected 18 hours after co-culture with apoptotic B16-OVA cells (5 apoptotic cells : 1 DC). The  
967 Bio-Plex® Multiplex Immunoassay System (Bio-Rad, Hercules, CA) was used following the  
968 manufacturer's instructions to detect the cytokines and chemokines released from the co-cultures.  
969 IFN $\beta$  was detected using Legend Max IFN $\beta$  ELISA kit (Biolegend, San Diego, CA, US). Data  
970 (mean  $\pm$  SEM) represent three independent experiments from 5 mice per genotype.

971

972 **Statistical Analysis.** All data were statistically analyzed using GraphPad Prism software v6.01  
973 (GraphPad Software, La Jolla, CA, USA). The statistical significance was determined by a Student  
974 t-test or two-way ANOVA with multiple comparison test (MCT) as indicated in the figure legends  
975 and  $p < 0.05$  was considered significant.

976

## 977 **Supplemental Information Legends**

978

979 **Figure S1, related to Figure 1: *Rubcn*<sup>-/-</sup> DCs display increased cross-presentation capacity**

980 **but equivalent levels of peptide-mediated MHC1 antigen presentation.** Bone marrow-derived

981 dendritic cells (DCs) were generated from *Rubcn*<sup>+/+</sup> (black) and *Rubcn*<sup>-/-</sup> (red) mice *in vitro* with

982 FLT3-L for 7 days. **(A)** DCs were harvested for Western blot analysis of RUBCN and  $\beta$ -actin

983 expression. **(B)** Representative flow cytometry plots for DCs on day 7 post-differentiation. **(C)**

984 DCs were co-cultured with apoptotic B16-OVA cells (1 or 5 apoptotic cells: 1 DC) at 4°C. Eighteen

985 hours later, DCs were harvested for flow cytometry analysis of H2-K<sup>b</sup> and H2-K<sup>b</sup>-OVA<sub>257-264</sub>

986 expression. **(D)** DCs were co-cultured with apoptotic Jurkat cells (5 apoptotic cells: 1 DC). Six

987 hours later, RNA was harvested for qPCR of cross-presentation machinery, *Tap1*, *Tap2*, *B2m*,

988 and *Rubcn*. Data are normalized to *Actinb* expression and expressed as mean  $\pm$  SEM. **(E)** DCs

989 were co-cultured with apoptotic B16-OVA cells (5 apoptotic cells: 1 DC). Eighteen hours later,

990 co-culture supernatant was collected and analyzed for cytokine and chemokine production by

991 multiplex or ELISA technology. **(F)** DCs were co-cultured with OVA<sub>257-264</sub> peptide (50 ng/ml) or

992 sOVA protein (150  $\mu$ g/ml). Eighteen hours later, DCs were harvested for flow cytometry analysis

993 of H2-K<sup>b</sup>-OVA<sub>257-264</sub> expression. **(G-H)** DCs were co-cultured with OVA<sub>257-264</sub> peptide (50 ng/ml) or

994 sOVA protein (150  $\mu$ g/ml). Eighteen hours later, loaded DCs were co-cultured with naïve OT-I

995 CD8<sup>+</sup> T cells, labeled with Tag-it Proliferation dye. Forty-eight hours later, *in vitro* cultures were

996 harvested for flow cytometry analysis of OT-I proliferation **(G)** or IFN $\gamma$  production **(H)**. Data are

997 expressed as mean  $\pm$  SEM. No less than three independent experiments were performed, with

998 3-5 replicates per condition. Significance was calculated using 2-way ANOVA (\*p<0.05, \*\*p<0.01,  
999 \*\*\*p<0.001).

1000

1001 **Figure S2, related to Figure 1: Defects in LAP, not canonical autophagy, results in**

1002 **increased cross-presentation. (A-B)** Bone marrow-derived dendritic cells (DCs) were

1003 generated from *Rubcn*<sup>+/+</sup> (black) and *Rubcn*<sup>-/-</sup> (red) mice *in vitro* with FLT3-L for 7 days. DCs were

1004 co-cultured with apoptotic B16-OVA cells (5 apoptotic cells: 1 DC). Eighteen hours later, loaded

1005 DCs incubated with anti-IgG, anti-CD86, and/or conditioned media from independent cultures, as

1006 indicated for at least 1 hour. DCs were then were co-cultured with naïve OT-I CD8<sup>+</sup> T cells,

1007 labeled with Tag-it Proliferation dye. Forty-eight hours later, *in vitro* cultures were harvested for

1008 flow cytometry flow cytometry analysis of OT-I proliferation. Representative histograms are

1009 shown. **(C-D)**. Bone marrow-derived dendritic cells (DCs) were generated from *Ulk1*<sup>+/+</sup> (black)

1010 and *Ulk1*<sup>-/-</sup> (blue) mice *in vitro* with FLT3-L for 7 days. DCs were co-cultured with sOVA protein

1011 (150 µg/ml) or apoptotic B16-OVA cells (5 apoptotic cells: 1 DC). Eighteen hours later, DCs were

1012 harvested for flow cytometry analysis of H2-K<sup>b</sup>-OVA<sub>257-264</sub> expression **(C)**. DCs were co-cultured

1013 sOVA protein (150 µg/ml) or apoptotic B16-OVA cells (5 apoptotic cells: 1 DC). Eighteen hours

1014 later, loaded DCs were co-cultured with naïve OT-I CD8<sup>+</sup> T cells, labeled with Tag-it Proliferation

1015 dye. Forty-eight hours later, *in vitro* cultures were harvested for flow cytometry analysis of OT-I

1016 proliferation **(D)**. **(E-F)**. Bone marrow-derived dendritic cells (DCs) were generated from *Atg7*<sup>flox/flox</sup>

1017 (black) and *Cd11c-Cre*<sup>+</sup> *Atg7*<sup>flox/flox</sup> (green) mice *in vitro* with FLT3-L for 7 days. DCs were co-

1018 cultured with sOVA protein (150 µg/ml) or apoptotic B16-OVA cells (5 apoptotic cells: 1 DC).

1019 Eighteen hours later, DCs were harvested for flow cytometry analysis of H2-K<sup>b</sup>-OVA<sub>257-264</sub>

1020 expression **(E)**. DCs were co-cultured sOVA protein (150 µg/ml) or apoptotic B16-OVA cells (5

1021 apoptotic cells: 1 DC). Eighteen hours later, loaded DCs were co-cultured with naïve OT-I CD8<sup>+</sup>

1022 T cells, labeled with Tag-it Proliferation dye. Forty-eight hours later, *in vitro* cultures were



1023 harvested for flow cytometry analysis of OT-I proliferation (**F**). Data are expressed as mean  $\pm$   
1024 SEM. No less than three independent experiments were performed, with 3-5 replicates per  
1025 condition. Significance was calculated using 2-way ANOVA (\* $p < 0.05$ , \*\* $p < 0.01$ , \*\*\* $p < 0.001$ ).

1026

1027 **Figure S3, related to Figures 2 and 3: *Rubcn*<sup>-/-</sup> DCs display increased phagosome-to-**  
1028 **cytosol escape and sensitive to proteasome inhibition.** Bone marrow-derived dendritic cells  
1029 (DCs) were generated from *Rubcn*<sup>+/+</sup> (black) and *Rubcn*<sup>-/-</sup> (red) mice *in vitro* with FLT3-L for 7  
1030 days. (**A**) DCs were co-cultured with apoptotic Jurkat cells (5 apoptotic cells: 1 DC). Thirty  
1031 minutes later, RNA was harvested for RNA-seq. Genes with fold change (FC>1.25) compared to  
1032 no stimulation and  $p < 0.05$  (ANOVA) were considered significant and entered in Ingenuity  
1033 Pathway Analysis (IPA) and R studio for further pathway analysis. Heatmap of lysosomal  
1034 machinery depicted as average row z-score is shown (n=3 per genotype). (**B**) DCs were co-  
1035 cultured with PKH26-labeled apoptotic B16-OVA cells (5 apoptotic cells: 1 DC). Time-lapse  
1036 imaging was performed for 6 hours to examine the rate of clearance of apoptotic cells. Mean  
1037 fluorescence of PKH26 per field was obtained from images using Fiji. Data are expressed as  
1038 mean  $\pm$  SEM. (n=15 fields per timepoint per condition). (**C**) sOVA protein was labeled with pHrodo  
1039 Red per manufacturer's instructions, then co-cultured (150  $\mu\text{g/ml}$ ) with *Rubcn*<sup>+/+</sup> and *Rubcn*<sup>-/-</sup> DCs  
1040 *in vitro*. Four hours later, pHrodo Red fluorescence was measured in DCs by flow cytometry, as  
1041 a readout of phagosomal maturation. (**D**) DCs were plated in in chamber slides, and were fixed,  
1042 permeabilized, stained for Sec22b (blue), H2-K<sup>b</sup> (red), and Calreticulin (green), and imaged via  
1043 confocal microscopy. Co-localization of Sec22b and Calreticulin was obtained from images using  
1044 Fiji. Data are expressed as mean  $\pm$  SEM (n=15 cells per condition). (**E**) DCs were permeabilized  
1045 with 20  $\mu\text{g/ml}$  or 200  $\mu\text{g/ml}$  digitonin, then incubated with cathepsin-specific fluorogenic substrate,  
1046 Z-FR-AMC (30  $\mu\text{M}$ ), which emits fluorescence at 460 nm upon cathepsin-mediated cleavage.  
1047 Membrane portions of samples were pelleted by centrifugation, and cytosolic supernatant portions  
1048 were collected and analyzed for fluorescence (460 nm) using Tecan microplate reader. (**F-G**).



1049 DCs were co-cultured with PKH26-labeled apoptotic B16-OVA cells (5 apoptotic cells: 1 DC, **F**)  
1050 or Alexa Fluor 555-labeled sOVA protein (150 µg/ml, **G**). Six hours later, DCs were permeabilized  
1051 with digitonin (20 µg/ml), and membrane portions of samples were pelleted by centrifugation.  
1052 Cytosolic supernatant portions were collected and analyzed for fluorescence (567 nm [**F**] or 580  
1053 nm [**G**]) using Tecan microplate reader. (**H**) DCs were pre-treated with vehicle or chloroquine  
1054 (CQ) at 1 or 10 µM for 2 hours and then co-cultured with sOVA protein (150 µg/ml). Eighteen  
1055 hours later, DCs were harvested for flow cytometry analysis of H2-K<sup>b</sup>-OVA<sub>257-264</sub> expression. (**I**)  
1056 DCs were pre-treated with vehicle or MG-132 at 1 or 10 µM for 2 hours and then co-cultured in  
1057 fresh media with sOVA protein (150 µg/ml). Eighteen hours later, DCs were harvested for flow  
1058 cytometry analysis of H2-K<sup>b</sup>-OVA<sub>257-264</sub> expression. (**J**) DCs were co-cultured with apoptotic  
1059 Jurkat cells (5 apoptotic cells: 1 DC). Thirty minutes later, RNA was harvested for RNA-seq.  
1060 Genes with fold change (FC>1.25) compared to no stimulation and p<0.05 (ANOVA) were  
1061 considered significant and entered in Ingenuity Pathway Analysis (IPA) and R studio for further  
1062 pathway analysis. Heatmap of proteasome machinery depicted as average row z-score is shown  
1063 (n=3 per genotype). (**K**) DCs were pre-treated with vehicle or Brefeldin A at 3 µg/ml for 2 hours  
1064 and then co-cultured in fresh media with sOVA protein (150 µg/ml). Eighteen hours later, DCs  
1065 were harvested for flow cytometry analysis of H2-K<sup>b</sup>-OVA<sub>257-264</sub> expression. Data are expressed  
1066 as mean ± SEM. No less than two independent experiments were performed, with 3-5 replicates  
1067 per condition. Significance was calculated using 2-way ANOVA (\*p<0.05, \*\*p<0.01, \*\*\*p<0.001).

1068

1069 **Figure S4, related to Figure 4: *Cd11c-Cre Rubcn*<sup>flox/flox</sup> mice display increased anti-tumor**  
1070 **immunity at day 22 *in vivo*. (A)** Spleens from *Rubcn*<sup>flox/flox</sup> and *Cd11-Cre*<sup>+</sup> *Rubcn*<sup>flox/flox</sup> littermates  
1071 were harvested. CD11c<sup>+</sup> cells were isolated via magnetic bead separation and subjected to  
1072 Western blot analysis for RUBCN and β-actin expression. (**B**) 1 x 10<sup>6</sup> B16-OVA cells were injected  
1073 intradermally into *Rubcn*<sup>flox/flox</sup> (black, n=7) or *Cd11-Cre*<sup>+</sup> *Rubcn*<sup>flox/flox</sup> (red, n=8) mice. Tumor  
1074 growth for individual mice was monitored and recorded. (**C**) 1 x 10<sup>6</sup> B16-OVA cells were injected

1075 intradermally into *Rubcn*<sup>flox/flox</sup> (black, n=5) or *Cd11-Cre*<sup>+</sup> *Rubcn*<sup>flox/flox</sup> (red, n=5) mice. On day 16  
1076 post-injection, tumors harvested for flow cytometry analysis. Representative flow cytometry plots  
1077 and gating strategies for tumor-infiltrating immune cells are shown. **(D)** On day 16 post-injection,  
1078 tumors were harvested for flow cytometry analysis. Percentage of F480<sup>+</sup> macrophages (M0s)  
1079 within CD45<sup>+</sup> population and MFI of H2-K<sup>b</sup>-OVA<sub>257-264</sub> expression are expressed as mean ± SEM.  
1080 **(E-F)** On day 22 post-injection, tumors were harvested for flow cytometry analysis.. Percentage  
1081 of CD11c<sup>+</sup> CD103<sup>+</sup> CD8α<sup>+</sup> DCs within CD45<sup>+</sup> population and MFI of H2-K<sup>b</sup>-OVA<sub>257-264</sub> expression  
1082 **(E)** are expressed as mean ± SEM. Percentage of CD8α<sup>+</sup> Tetramer<sup>+</sup> T cells within CD45<sup>+</sup>  
1083 population and percentage of CD69<sup>+</sup>, IFNγ<sup>+</sup>, TNFα<sup>+</sup>, and Perforin<sup>+</sup> CD8<sup>+</sup> T cells within tumor **(F)**  
1084 are expressed as mean ± SEM. No less than three independent experiments were performed,  
1085 with 5 replicates per genotype. Significance was calculated using 2-way ANOVA (\*p<0.05,  
1086 \*\*p<0.01, \*\*\*p<0.001).

1087

## 1088 **References**

1089 Alloatti, A., Rookhuizen, D.C., Joannas, L., Carpiere, J.M., Iborra, S., Magalhaes, J.G., Yatim, N.,  
1090 Kozik, P., Sancho, D., Albert, M.L., and Amigorena, S. (2017). Critical role for Sec22b-dependent  
1091 antigen cross-presentation in antitumor immunity. *J Exp Med* 214, 2231-2241.  
1092 Andrieu, M., Desoutter, J.F., Loing, E., Gaston, J., Hanau, D., Guillet, J.G., and Hosmalin, A.  
1093 (2003). Two human immunodeficiency virus vaccinal lipopeptides follow different cross-  
1094 presentation pathways in human dendritic cells. *J Virol* 77, 1564-1570.  
1095 Belizaire, R., and Unanue, E.R. (2009). Targeting proteins to distinct subcellular compartments  
1096 reveals unique requirements for MHC class I and II presentation. *Proc Natl Acad Sci U S A* 106,  
1097 17463-17468.  
1098 Blachere, N.E., Darnell, R.B., and Albert, M.L. (2005). Apoptotic cells deliver processed antigen  
1099 to dendritic cells for cross-presentation. *PLoS Biol* 3, e185.  
1100 Boya, P., Gonzalez-Polo, R.A., Poncet, D., Andreau, K., Vieira, H.L., Roumier, T., Perfettini, J.L.,  
1101 and Kroemer, G. (2003). Mitochondrial membrane permeabilization is a critical step of lysosome-  
1102 initiated apoptosis induced by hydroxychloroquine. *Oncogene* 22, 3927-3936.  
1103 Brasel, K., De Smedt, T., Smith, J.L., and Maliszewski, C.R. (2000). Generation of murine  
1104 dendritic cells from flt3-ligand-supplemented bone marrow cultures. *Blood* 96, 3029-3039.  
1105 Burgdorf, S., Lukacs-Kornek, V., and Kurts, C. (2006). The mannose receptor mediates uptake  
1106 of soluble but not of cell-associated antigen for cross-presentation. *J Immunol* 176, 6770-6776.  
1107 Burgdorf, S., Scholz, C., Kautz, A., Tampe, R., and Kurts, C. (2008). Spatial and mechanistic  
1108 separation of cross-presentation and endogenous antigen presentation. *Nat Immunol* 9, 558-566.  
1109 Calderon, B., and Unanue, E.R. (2012). Antigen presentation events in autoimmune diabetes.  
1110 *Curr Opin Immunol* 24, 119-128.

1111 Cebrian, I., Visentin, G., Blanchard, N., Jouve, M., Bobard, A., Moita, C., Enninga, J., Moita, L.F.,  
1112 Amigorena, S., and Savina, A. (2011). Sec22b regulates phagosomal maturation and antigen  
1113 crosspresentation by dendritic cells. *Cell* 147, 1355-1368.

1114 Cruz, F.M., Colbert, J.D., Merino, E., Kriegsman, B.A., and Rock, K.L. (2017). The Biology and  
1115 Underlying Mechanisms of Cross-Presentation of Exogenous Antigens on MHC-I Molecules.  
1116 *Annu Rev Immunol* 35, 149-176.

1117 Cunha, L.D., Yang, M., Carter, R., Guy, C., Harris, L., Crawford, J.C., Quarato, G., Boada-  
1118 Romero, E., Kalkavan, H., Johnson, M.D.L., *et al.* (2018). LC3-Associated Phagocytosis in  
1119 Myeloid Cells Promotes Tumor Immune Tolerance. *Cell* 175, 429-441 e416.

1120 Dobin, A., Davis, C.A., Schlesinger, F., Drenkow, J., Zaleski, C., Jha, S., Batut, P., Chaisson, M.,  
1121 and Gingeras, T.R. (2013). STAR: ultrafast universal RNA-seq aligner. *Bioinformatics* 29, 15-21.

1122 Fehres, C.M., Unger, W.W., Garcia-Vallejo, J.J., and van Kooyk, Y. (2014). Understanding the  
1123 biology of antigen cross-presentation for the design of vaccines against cancer. *Front Immunol* 5,  
1124 149.

1125 Garcia-Mata, R., Szul, T., Alvarez, C., and Sztul, E. (2003). ADP-ribosylation factor/COPI-  
1126 dependent events at the endoplasmic reticulum-Golgi interface are regulated by the guanine  
1127 nucleotide exchange factor GBF1. *Mol Biol Cell* 14, 2250-2261.

1128 Greenwald, R.J., Freeman, G.J., and Sharpe, A.H. (2005). The B7 family revisited. *Annu Rev*  
1129 *Immunol* 23, 515-548.

1130 Gutierrez-Martinez, E., Planes, R., Anselmi, G., Reynolds, M., Menezes, S., Adiko, A.C.,  
1131 Saveanu, L., and Guermonprez, P. (2015). Cross-Presentation of Cell-Associated Antigens by  
1132 MHC Class I in Dendritic Cell Subsets. *Front Immunol* 6, 363.

1133 Hansen, T.H., and Bouvier, M. (2009). MHC class I antigen presentation: learning from viral  
1134 evasion strategies. *Nat Rev Immunol* 9, 503-513.

1135 Hayashi, K., Taura, M., and Iwasaki, A. (2018). The interaction between IKKalpha and LC3  
1136 promotes type I interferon production through the TLR9-containing LAPosome. *Sci Signal* 11.

1137 Heckmann, B.L., Teubner, B.J.W., Tummers, B., Boada-Romero, E., Harris, L., Yang, M., Guy,  
1138 C.S., Zakharenko, S.S., and Green, D.R. (2019). LC3-Associated Endocytosis Facilitates beta-  
1139 Amyloid Clearance and Mitigates Neurodegeneration in Murine Alzheimer's Disease. *Cell* 178,  
1140 536-551 e514.

1141 Henault, J., Martinez, J., Riggs, J.M., Tian, J., Mehta, P., Clarke, L., Sasai, M., Latz, E.,  
1142 Brinkmann, M.M., Iwasaki, A., *et al.* (2012). Noncanonical autophagy is required for type I  
1143 interferon secretion in response to DNA-immune complexes. *Immunity* 37, 986-997.

1144 Hogquist, K.A., Jameson, S.C., Heath, W.R., Howard, J.L., Bevan, M.J., and Carbone, F.R.  
1145 (1994). T cell receptor antagonist peptides induce positive selection. *Cell* 76, 17-27.

1146 Huang, A.Y., Golumbek, P., Ahmadzadeh, M., Jaffee, E., Pardoll, D., and Levitsky, H. (1994).  
1147 Role of bone marrow-derived cells in presenting MHC class I-restricted tumor antigens. *Science*  
1148 264, 961-965.

1149 Jantas, D., Greda, A., Leskiewicz, M., Grygier, B., Pilc, A., and Lason, W. (2015). Neuroprotective  
1150 effects of mGluR II and III activators against staurosporine- and doxorubicin-induced cellular injury  
1151 in SH-SY5Y cells: New evidence for a mechanism involving inhibition of AIF translocation.  
1152 *Neurochem Int* 88, 124-137.

1153 Ji, Q., Castelli, L., and Gorman, J.M. (2013). MHC class I-restricted myelin epitopes are cross-  
1154 presented by Tip-DCs that promote determinant spreading to CD8(+) T cells. *Nat Immunol* 14,  
1155 254-261.

1156 Joffre, O.P., Segura, E., Savina, A., and Amigorena, S. (2012). Cross-presentation by dendritic  
1157 cells. *Nat Rev Immunol* 12, 557-569.

1158 Kantoff, P.W., Higano, C.S., Shore, N.D., Berger, E.R., Small, E.J., Penson, D.F., Redfern, C.H.,  
1159 Ferrari, A.C., Dreicer, R., Sims, R.B., *et al.* (2010). Sipuleucel-T immunotherapy for castration-  
1160 resistant prostate cancer. *N Engl J Med* 363, 411-422.

- 1161 Kaufman, J. (2018). Generalists and Specialists: A New View of How MHC Class I Molecules  
1162 Fight Infectious Pathogens. *Trends Immunol* 39, 367-379.
- 1163 Keller, C., Mellouk, N., Danckaert, A., Simeone, R., Brosch, R., Enninga, J., and Bobard, A.  
1164 (2013). Single cell measurements of vacuolar rupture caused by intracellular pathogens. *J Vis*  
1165 *Exp*, e50116.
- 1166 Keller, C.W., Sina, C., Kotur, M.B., Ramelli, G., Mundt, S., Quast, I., Ligeon, L.A., Weber, P.,  
1167 Becher, B., Munz, C., and Lunemann, J.D. (2017). ATG-dependent phagocytosis in dendritic cells  
1168 drives myelin-specific CD4(+) T cell pathogenicity during CNS inflammation. *Proc Natl Acad Sci*  
1169 *U S A* 114, E11228-E11237.
- 1170 Komatsu, M., Waguri, S., Ueno, T., Iwata, J., Murata, S., Tanida, I., Ezaki, J., Mizushima, N.,  
1171 Ohsumi, Y., Uchiyama, Y., *et al.* (2005). Impairment of starvation-induced and constitutive  
1172 autophagy in Atg7-deficient mice. *J Cell Biol* 169, 425-434.
- 1173 Kovacsovics-Bankowski, M., and Rock, K.L. (1995). A phagosome-to-cytosol pathway for  
1174 exogenous antigens presented on MHC class I molecules. *Science* 267, 243-246.
- 1175 Kundu, M., Lindsten, T., Yang, C.Y., Wu, J., Zhao, F., Zhang, J., Selak, M.A., Ney, P.A., and  
1176 Thompson, C.B. (2008). Ulk1 plays a critical role in the autophagic clearance of mitochondria and  
1177 ribosomes during reticulocyte maturation. *Blood* 112, 1493-1502.
- 1178 Liao, Y., Smyth, G.K., and Shi, W. (2014). featureCounts: an efficient general purpose program  
1179 for assigning sequence reads to genomic features. *Bioinformatics* 30, 923-930.
- 1180 Loi, M., Muller, A., Steinbach, K., Niven, J., Barreira da Silva, R., Paul, P., Ligeon, L.A., Caruso,  
1181 A., Albrecht, R.A., Becker, A.C., *et al.* (2016). Macroautophagy Proteins Control MHC Class I  
1182 Levels on Dendritic Cells and Shape Anti-viral CD8(+) T Cell Responses. *Cell Rep* 15, 1076-  
1183 1087.
- 1184 Love, M.I., Huber, W., and Anders, S. (2014). Moderated estimation of fold change and dispersion  
1185 for RNA-seq data with DESeq2. *Genome biology* 15, 550.
- 1186 Maranon, C., Desoutter, J.F., Hoeffel, G., Cohen, W., Hanau, D., and Hosmalin, A. (2004).  
1187 Dendritic cells cross-present HIV antigens from live as well as apoptotic infected CD4+ T  
1188 lymphocytes. *Proc Natl Acad Sci U S A* 101, 6092-6097.
- 1189 Marino, E., Tan, B., Binge, L., Mackay, C.R., and Grey, S.T. (2012). B-cell cross-presentation of  
1190 autologous antigen precipitates diabetes. *Diabetes* 61, 2893-2905.
- 1191 Martinez, J., Almendinger, J., Oberst, A., Ness, R., Dillon, C.P., Fitzgerald, P., Hengartner, M.O.,  
1192 and Green, D.R. (2011a). Microtubule-associated protein 1 light chain 3 alpha (LC3)-associated  
1193 phagocytosis is required for the efficient clearance of dead cells. *Proceedings of the National*  
1194 *Academy of Sciences of the United States of America* 108, 17396-17401.
- 1195 Martinez, J., Almendinger, J., Oberst, A., Ness, R., Dillon, C.P., Fitzgerald, P., Hengartner, M.O.,  
1196 and Green, D.R. (2011b). Microtubule-associated protein 1 light chain 3 alpha (LC3)-associated  
1197 phagocytosis is required for the efficient clearance of dead cells. *Proc Natl Acad Sci U S A* 108,  
1198 17396-17401.
- 1199 Martinez, J., Cunha, L.D., Park, S., Yang, M., Lu, Q., Orchard, R., Li, Q.Z., Yan, M., Janke, L.,  
1200 Guy, C., *et al.* (2016a). Corrigendum: Noncanonical autophagy inhibits the autoinflammatory,  
1201 lupus-like response to dying cells. *Nature* 539, 124.
- 1202 Martinez, J., Cunha, L.D., Park, S., Yang, M., Lu, Q., Orchard, R., Li, Q.Z., Yan, M., Janke, L.,  
1203 Guy, C., *et al.* (2016b). Noncanonical autophagy inhibits the autoinflammatory, lupus-like  
1204 response to dying cells. *Nature* 533, 115-119.
- 1205 Martinez, J., Malireddi, R.K., Lu, Q., Cunha, L.D., Pelletier, S., Gingras, S., Orchard, R., Guan,  
1206 J.L., Tan, H., Peng, J., *et al.* (2015). Molecular characterization of LC3-associated phagocytosis  
1207 reveals distinct roles for Rubicon, NOX2 and autophagy proteins. *Nat Cell Biol* 17, 893-906.
- 1208 Mauthe, M., Orhon, I., Rocchi, C., Zhou, X., Luhr, M., Hijlkema, K.J., Coppes, R.P., Engedal, N.,  
1209 Mari, M., and Reggiori, F. (2018). Chloroquine inhibits autophagic flux by decreasing  
1210 autophagosome-lysosome fusion. *Autophagy* 14, 1435-1455.



1211 Nair-Gupta, P., Baccarini, A., Tung, N., Seyffer, F., Florey, O., Huang, Y., Banerjee, M.,  
1212 Overholtzer, M., Roche, P.A., Tampe, R., *et al.* (2014). TLR signals induce phagosomal MHC-I  
1213 delivery from the endosomal recycling compartment to allow cross-presentation. *Cell* 158, 506-  
1214 521.

1215 Palmowski, M.J., Gileadi, U., Salio, M., Gallimore, A., Millrain, M., James, E., Addey, C., Scott,  
1216 D., Dyson, J., Simpson, E., and Cerundolo, V. (2006). Role of immunoproteasomes in cross-  
1217 presentation. *J Immunol* 177, 983-990.

1218 Pooley, J.L., Heath, W.R., and Shortman, K. (2001). Cutting edge: intravenous soluble antigen is  
1219 presented to CD4 T cells by CD8- dendritic cells, but cross-presented to CD8 T cells by CD8+  
1220 dendritic cells. *J Immunol* 166, 5327-5330.

1221 Rahimi, R.A., and Luster, A.D. (2018). Chemokines: Critical Regulators of Memory T Cell  
1222 Development, Maintenance, and Function. *Adv Immunol* 138, 71-98.

1223 Repnik, U., Cesen, M.H., and Turk, B. (2016). Measuring Cysteine Cathepsin Activity to Detect  
1224 Lysosomal Membrane Permeabilization. *Cold Spring Harb Protoc* 2016.

1225 Rock, K.L., Reits, E., and Neefjes, J. (2016). Present Yourself! By MHC Class I and MHC Class  
1226 II Molecules. *Trends Immunol* 37, 724-737.

1227 Rouillard, A.D., Gundersen, G.W., Fernandez, N.F., Wang, Z., Monteiro, C.D., McDermott, M.G.,  
1228 and Ma'ayan, A. (2016). The harmonizome: a collection of processed datasets gathered to serve  
1229 and mine knowledge about genes and proteins. *Database (Oxford)* 2016.

1230 Sanchez-Paulete, A.R., Cueto, F.J., Martinez-Lopez, M., Labiano, S., Morales-Kastresana, A.,  
1231 Rodriguez-Ruiz, M.E., Jure-Kunkel, M., Azpilikueta, A., Aznar, M.A., Quetglas, J.I., *et al.* (2016).  
1232 Cancer Immunotherapy with Immunomodulatory Anti-CD137 and Anti-PD-1 Monoclonal  
1233 Antibodies Requires BATF3-Dependent Dendritic Cells. *Cancer Discov* 6, 71-79.

1234 Sanjuan, M.A., Milasta, S., and Green, D.R. (2009). Toll-like receptor signaling in the lysosomal  
1235 pathways. *Immunol Rev* 227, 203-220.

1236 Saveanu, L., Carroll, O., Weimershaus, M., Guernonprez, P., Firat, E., Lindo, V., Greer, F.,  
1237 Davoust, J., Kratzer, R., Keller, S.R., *et al.* (2009). IRAP identifies an endosomal compartment  
1238 required for MHC class I cross-presentation. *Science* 325, 213-217.

1239 Savina, A., and Amigorena, S. (2007). Phagocytosis and antigen presentation in dendritic cells.  
1240 *Immunol Rev* 219, 143-156.

1241 Saxena, M., and Bhardwaj, N. (2018). Re-Emergence of Dendritic Cell Vaccines for Cancer  
1242 Treatment. *Trends Cancer* 4, 119-137.

1243 Schindelin, J., Arganda-Carreras, I., Frise, E., Kaynig, V., Longair, M., Pietzsch, T., Preibisch, S.,  
1244 Rueden, C., Saalfeld, S., Schmid, B., *et al.* (2012). Fiji: an open-source platform for biological-  
1245 image analysis. *Nat Methods* 9, 676-682.

1246 Serreze, D.V., Chapman, H.D., Varnum, D.S., Gerling, I., Leiter, E.H., and Shultz, L.D. (1997).  
1247 Initiation of autoimmune diabetes in NOD/Lt mice is MHC class I-dependent. *J Immunol* 158,  
1248 3978-3986.

1249 Shen, L., Sigal, L.J., Boes, M., and Rock, K.L. (2004). Important role of cathepsin S in generating  
1250 peptides for TAP-independent MHC class I crosspresentation in vivo. *Immunity* 21, 155-165.

1251 Shvets, E., and Elazar, Z. (2009). Flow cytometric analysis of autophagy in living mammalian  
1252 cells. *Methods Enzymol* 452, 131-141.

1253 Snyder, A.G., Hubbard, N.W., Messmer, M.N., Kofman, S.B., Hagan, C.E., Orozco, S.L., Chiang,  
1254 K., Daniels, B.P., Baker, D., and Oberst, A. (2019). Intratumoral activation of the necroptotic  
1255 pathway components RIPK1 and RIPK3 potentiates antitumor immunity. *Sci Immunol* 4.

1256 Stober, D., Trobonjaca, Z., Reimann, J., and Schirmbeck, R. (2002). Dendritic cells pulsed with  
1257 exogenous hepatitis B surface antigen particles efficiently present epitopes to MHC class I-  
1258 restricted cytotoxic T cells. *Eur J Immunol* 32, 1099-1108.

1259 Turner, M.D., Nedjai, B., Hurst, T., and Pennington, D.J. (2014). Cytokines and chemokines: At  
1260 the crossroads of cell signalling and inflammatory disease. *Biochim Biophys Acta* 1843, 2563-  
1261 2582.

1262 Wolfers, J., Lozier, A., Raposo, G., Regnault, A., Thery, C., Masurier, C., Flament, C., Pouzieux,  
1263 S., Faure, F., Tursz, T., *et al.* (2001). Tumor-derived exosomes are a source of shared tumor  
1264 rejection antigens for CTL cross-priming. *Nat Med* 7, 297-303.  
1265 Wu, S.J., Niknafs, Y.S., Kim, S.H., Oravec-Wilson, K., Zajac, C., Toubai, T., Sun, Y., Prasad, J.,  
1266 Peltier, D., Fujiwara, H., *et al.* (2017). A Critical Analysis of the Role of SNARE Protein SEC22B  
1267 in Antigen Cross-Presentation. *Cell Rep* 19, 2645-2656.  
1268 Yatim, N., Jusforgues-Saklani, H., Orozco, S., Schulz, O., Barreira da Silva, R., Reis e Sousa, C.,  
1269 Green, D.R., Oberst, A., and Albert, M.L. (2015). RIPK1 and NF-kappaB signaling in dying cells  
1270 determines cross-priming of CD8(+) T cells. *Science* 350, 328-334.  
1271 Zhang, N., and Bevan, M.J. (2011). CD8(+) T cells: foot soldiers of the immune system. *Immunity*  
1272 35, 161-168.  
1273

**Figure 1: *Rubcn*<sup>-/-</sup> DCs display enhanced cross-presentation capacity.**

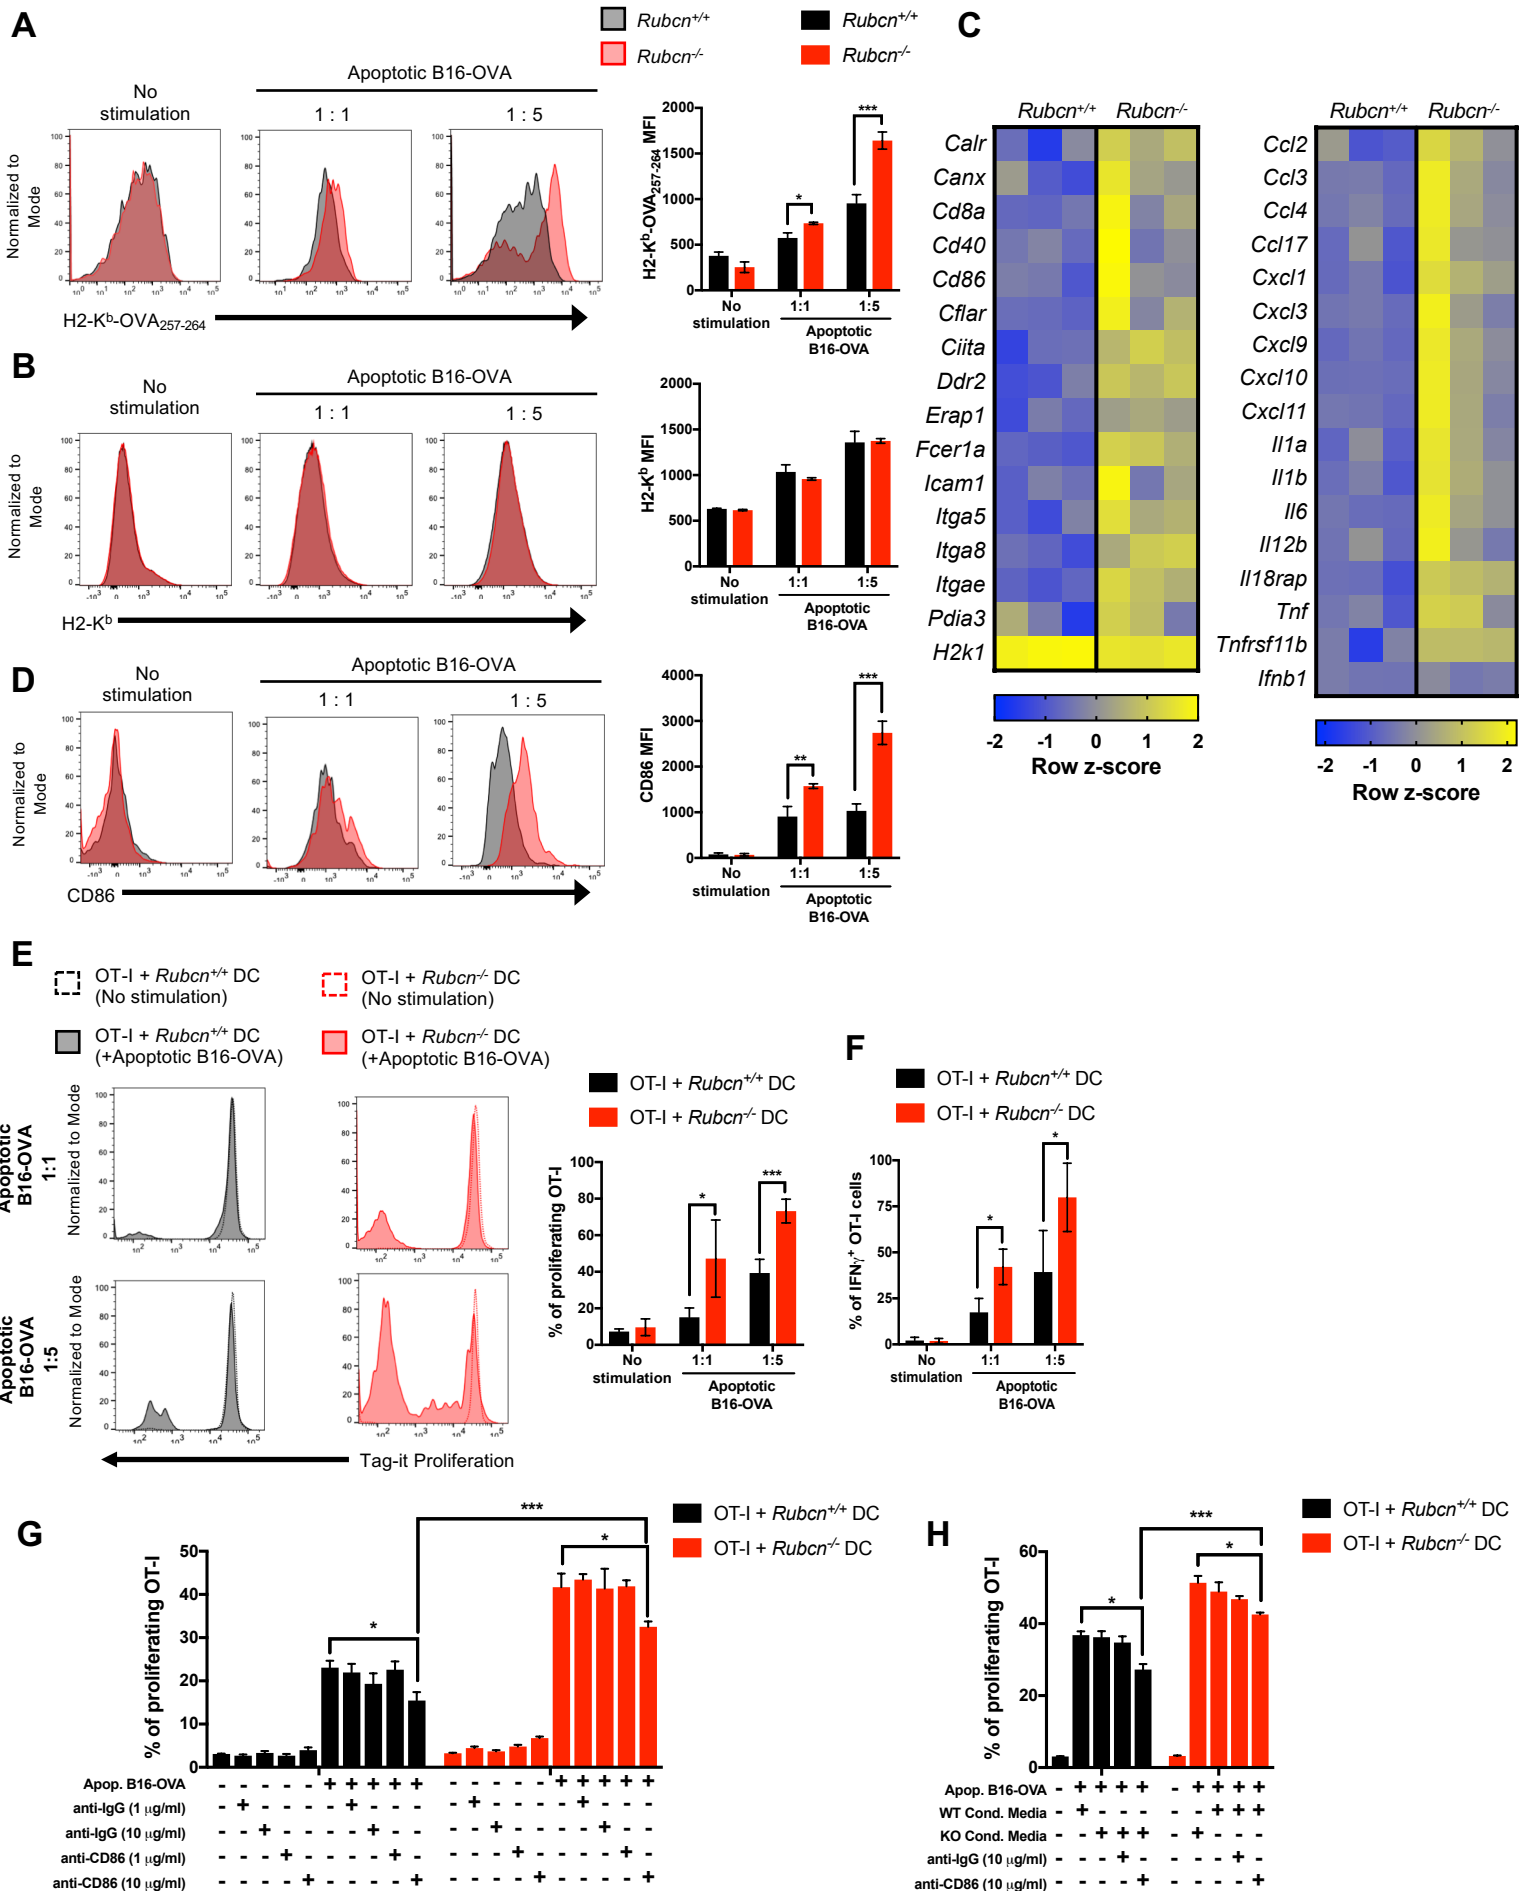

**Figure 2: *Rubcn*<sup>-/-</sup> DCs engulf cargo, yet retain cargo in less degradative phagosomes.**

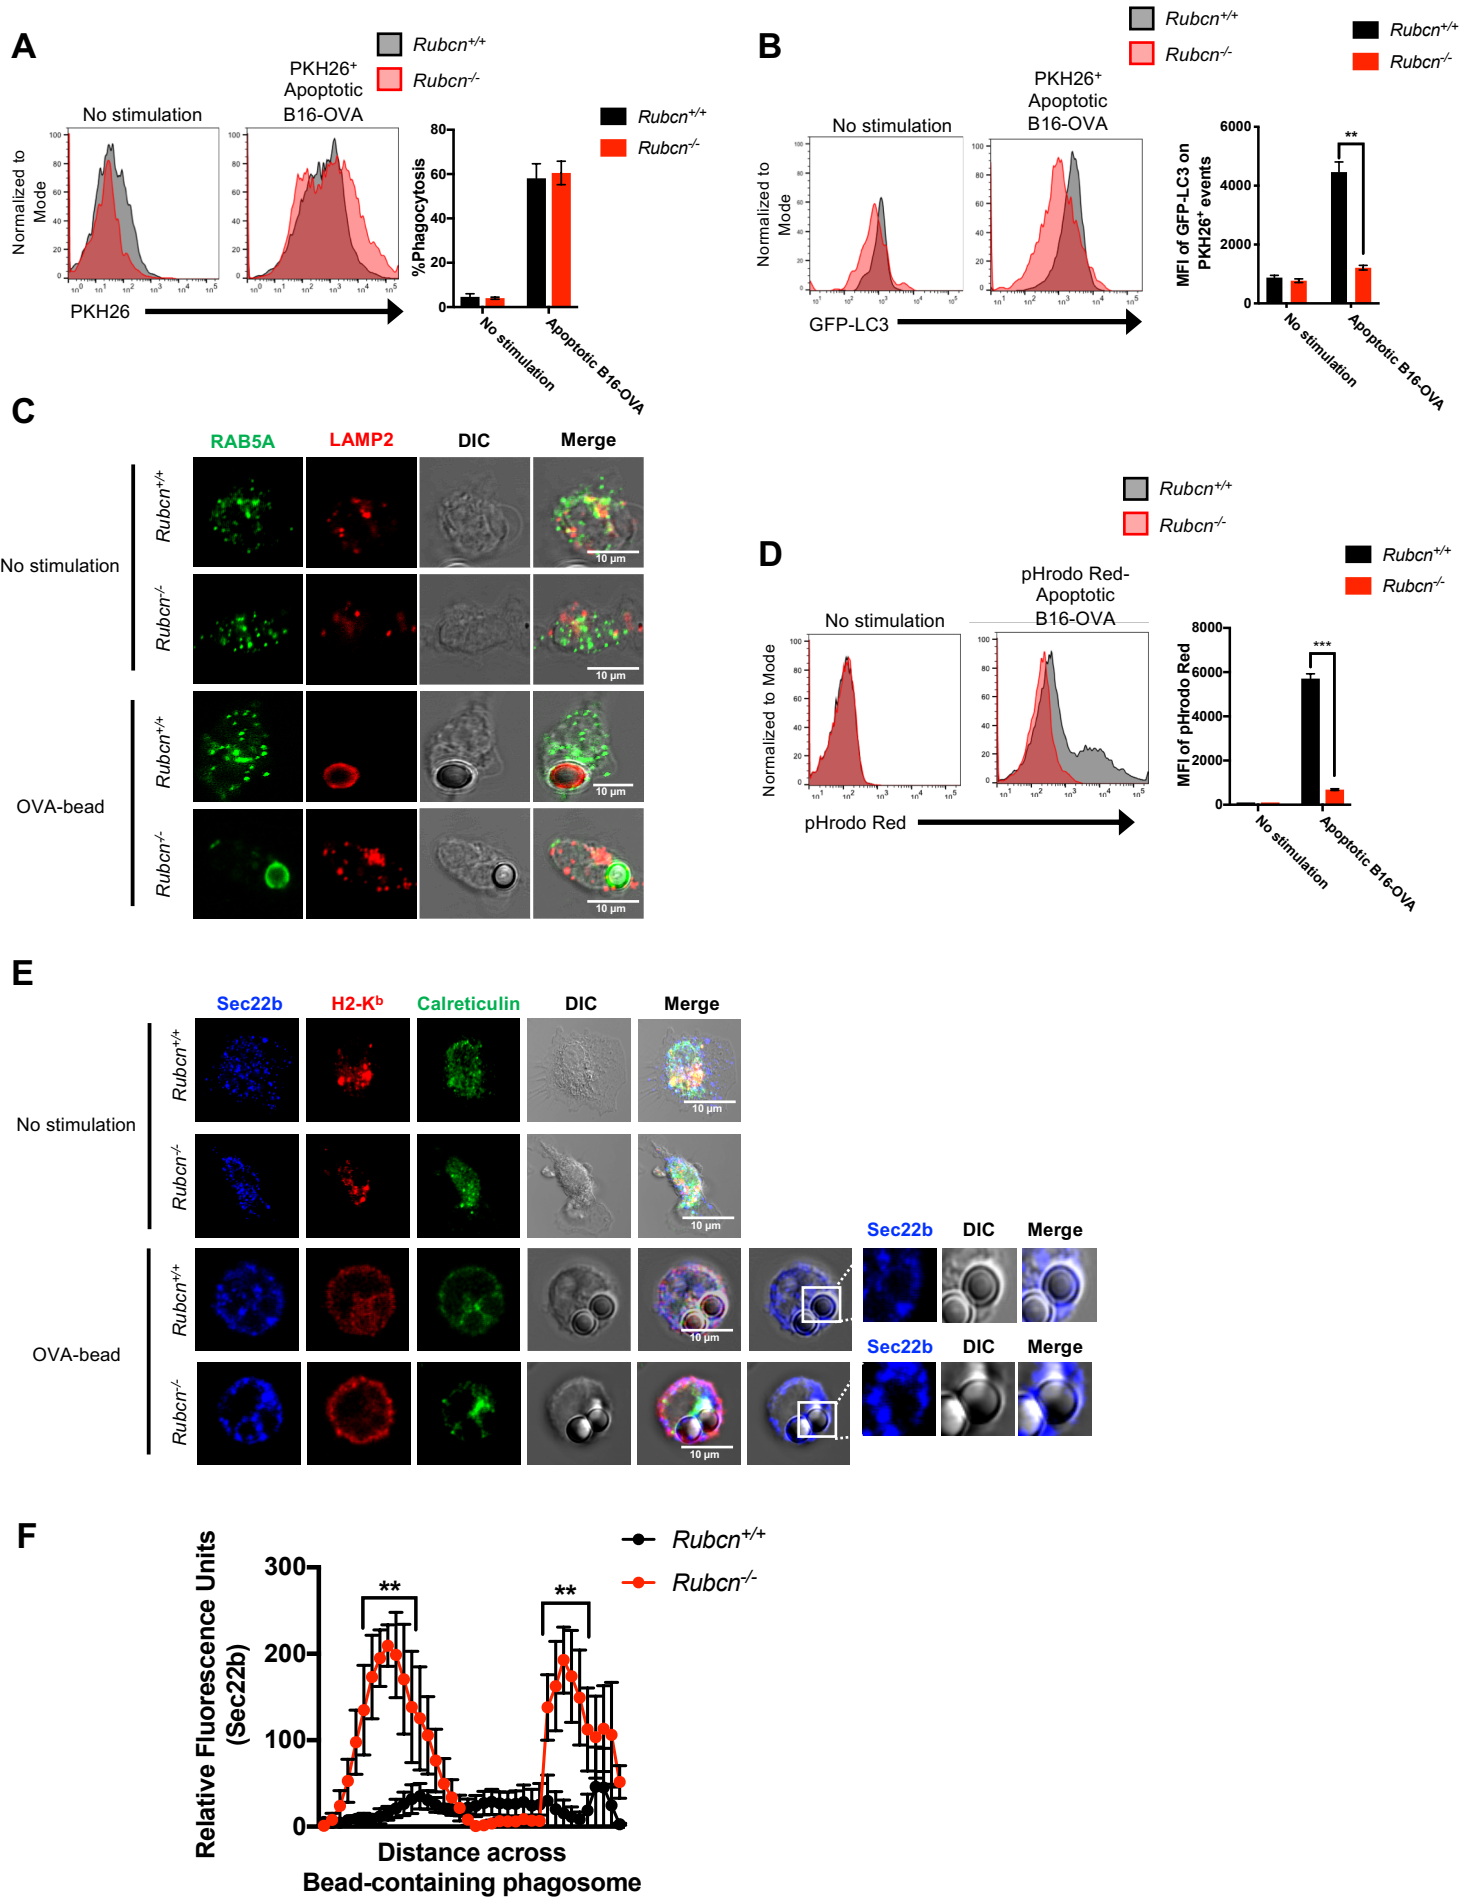



**Figure 3: *Rubcn*<sup>-/-</sup> DCs exhibit increased phagosome-to-cytosol escape and proteasome-mediated generation of peptides**

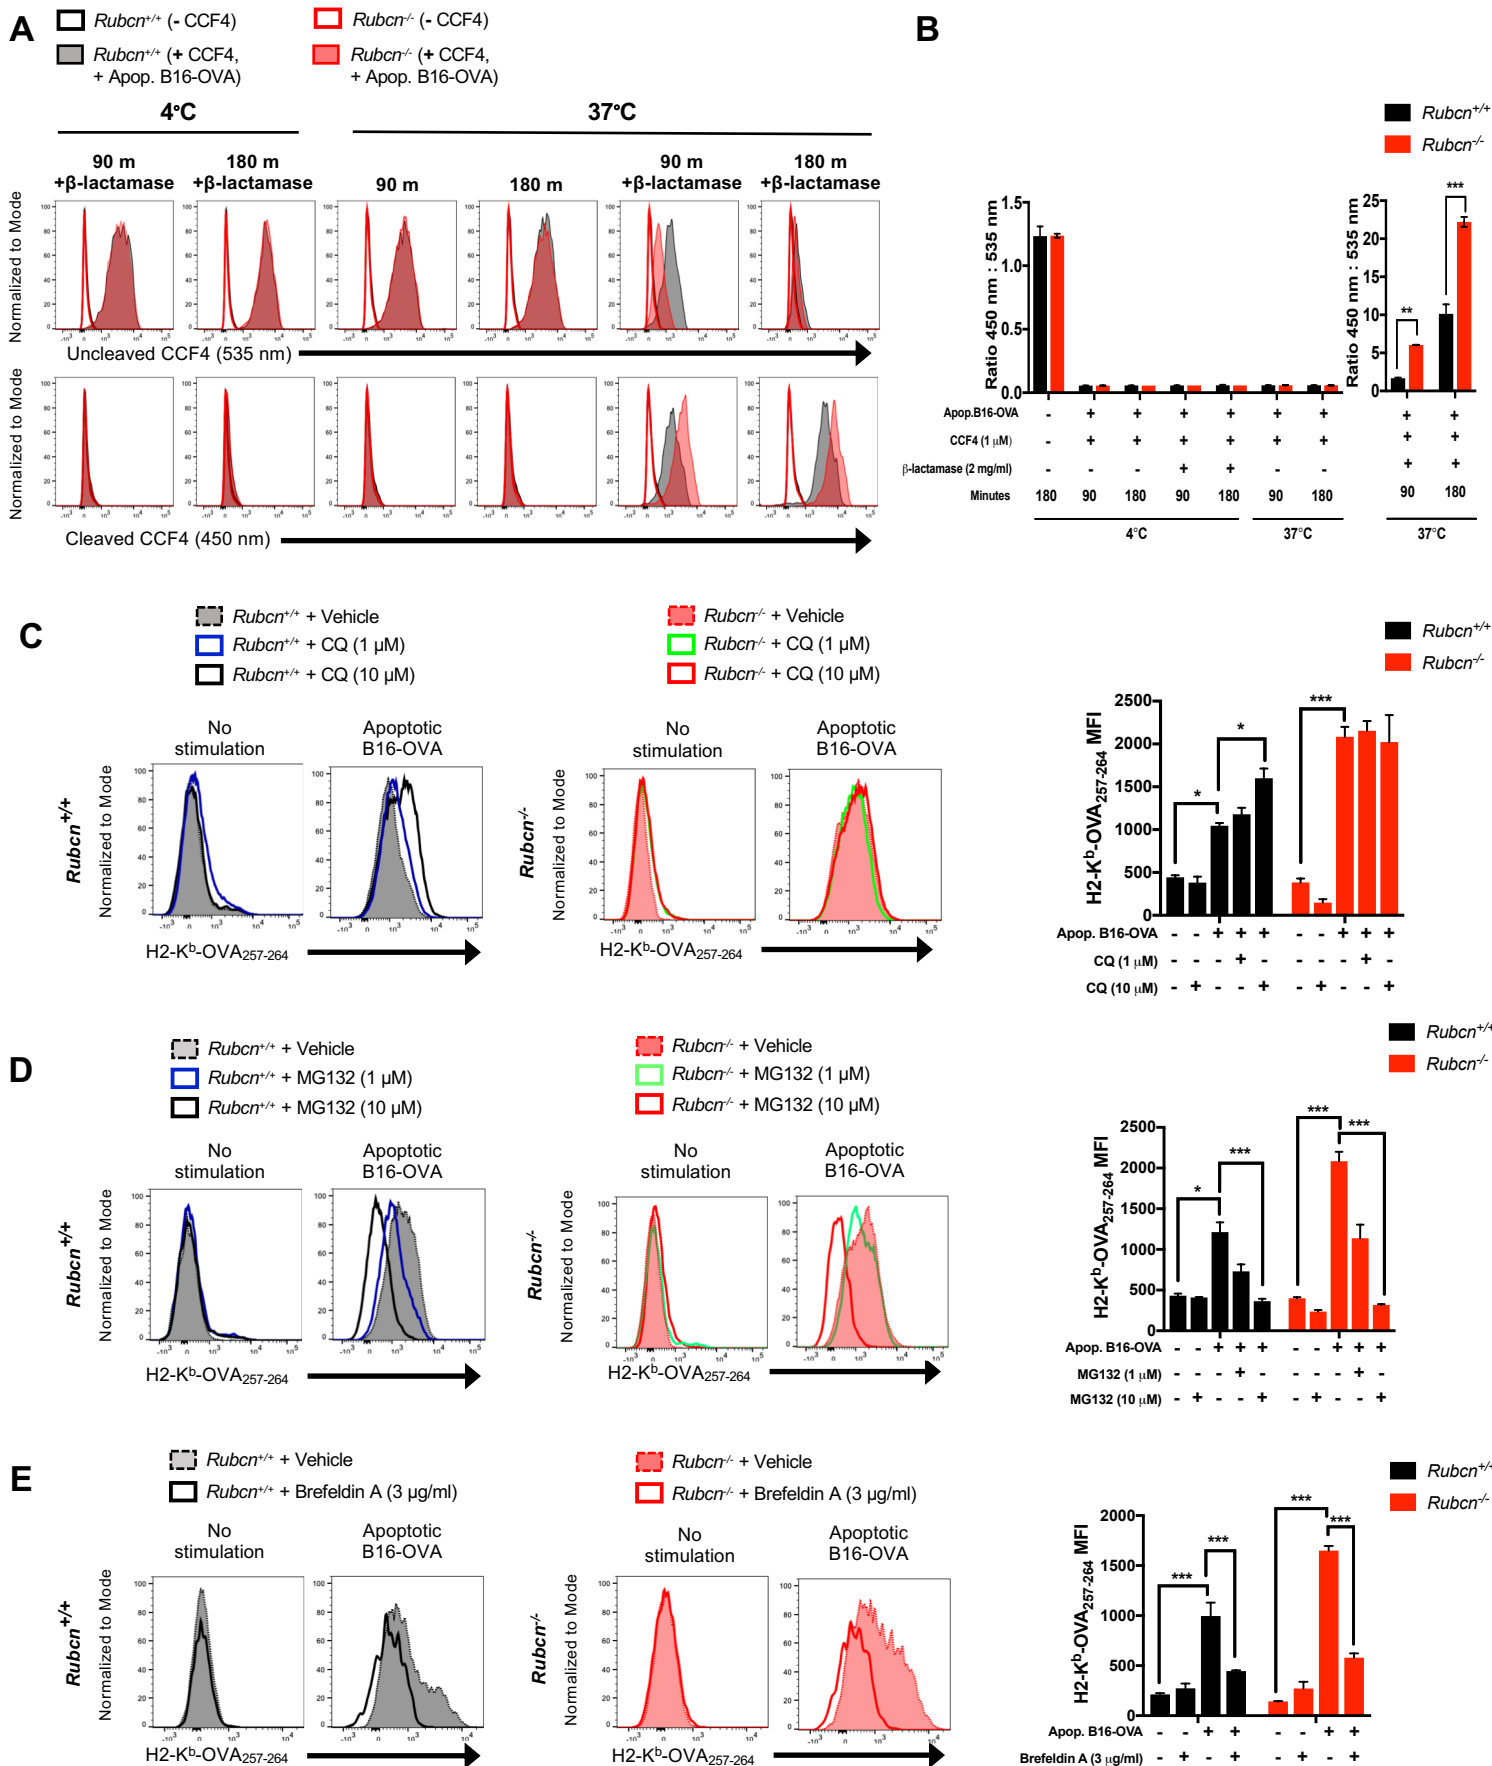

**Figure 4: *Cd11c-Cre Rubcn<sup>flx/flx</sup>* mice display decreased tumor burden and increased antigen-specific CD8<sup>+</sup> T cell activation.**

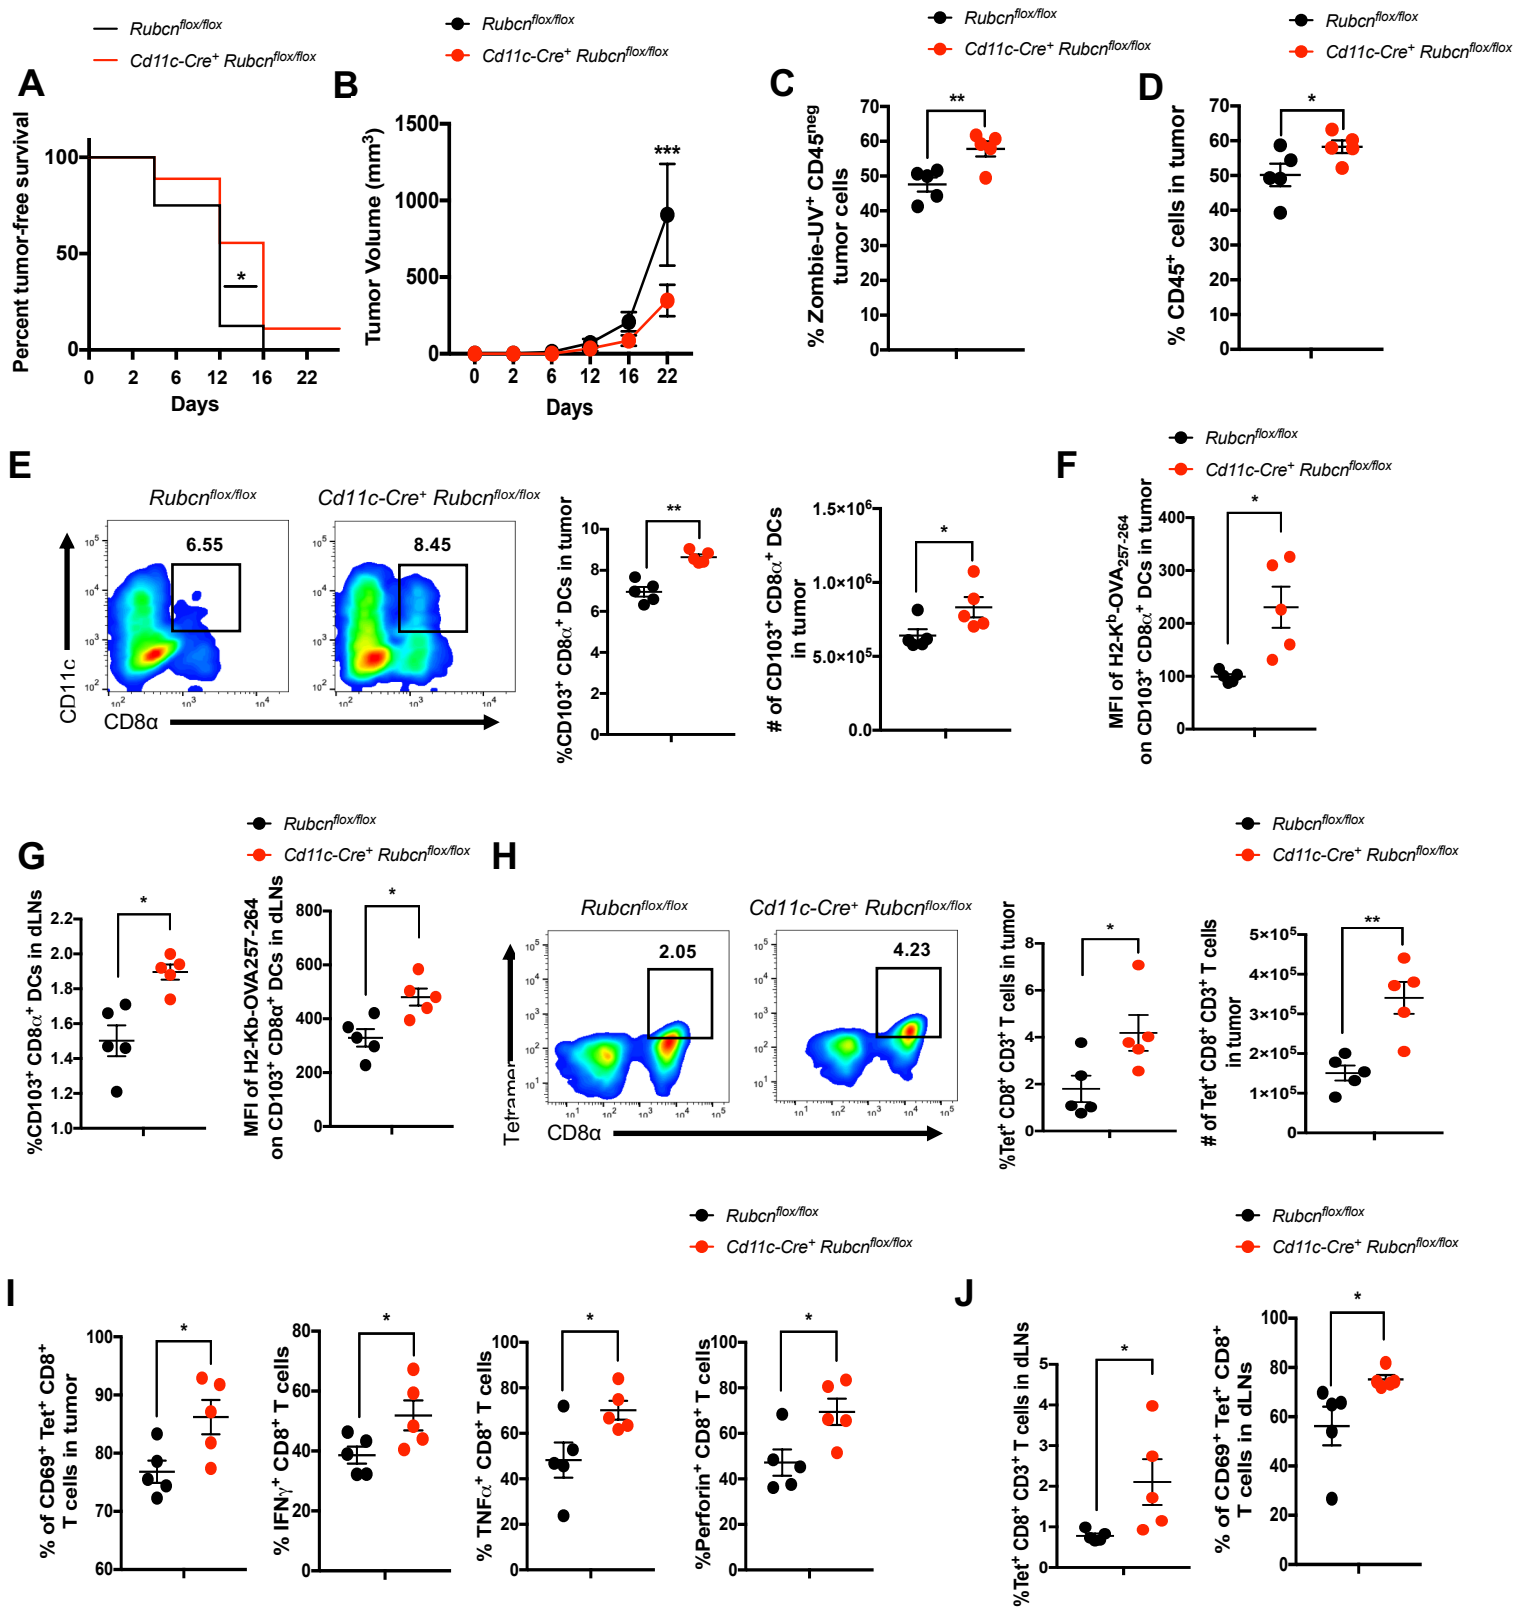

**Figure S1, related to Figure 1: *Rubcn*<sup>-/-</sup> DCs display increased cross-presentation capacity but equivalent levels of peptide-mediated MHC I antigen presentation.**

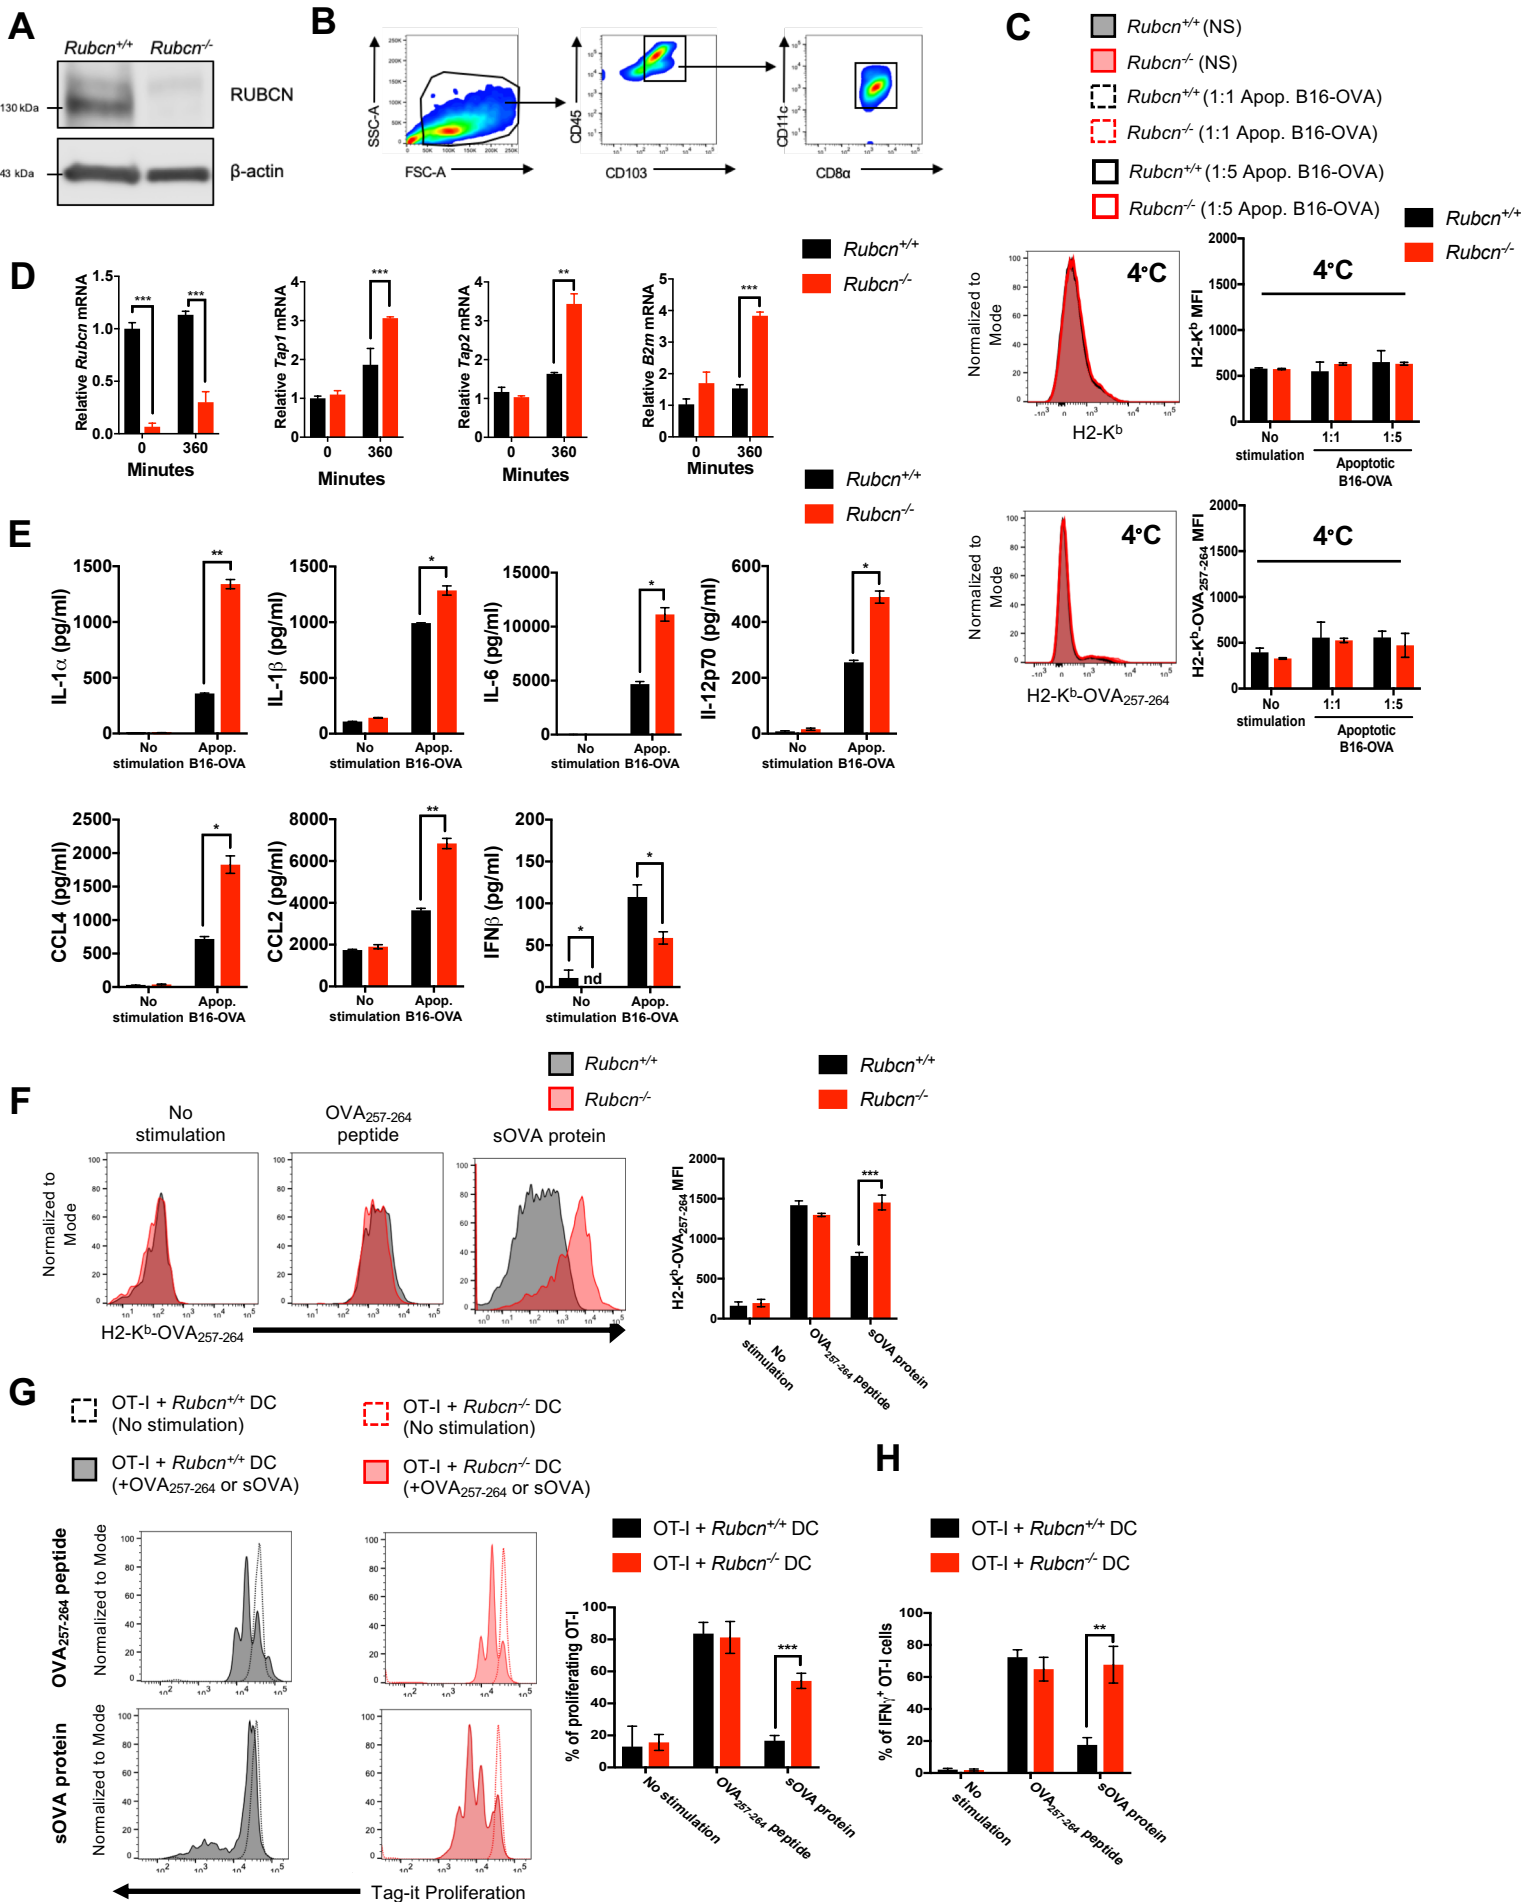

**Figure S2, related to Figure 1: Defects in LAP, not canonical autophagy, result in increased cross-presentation**

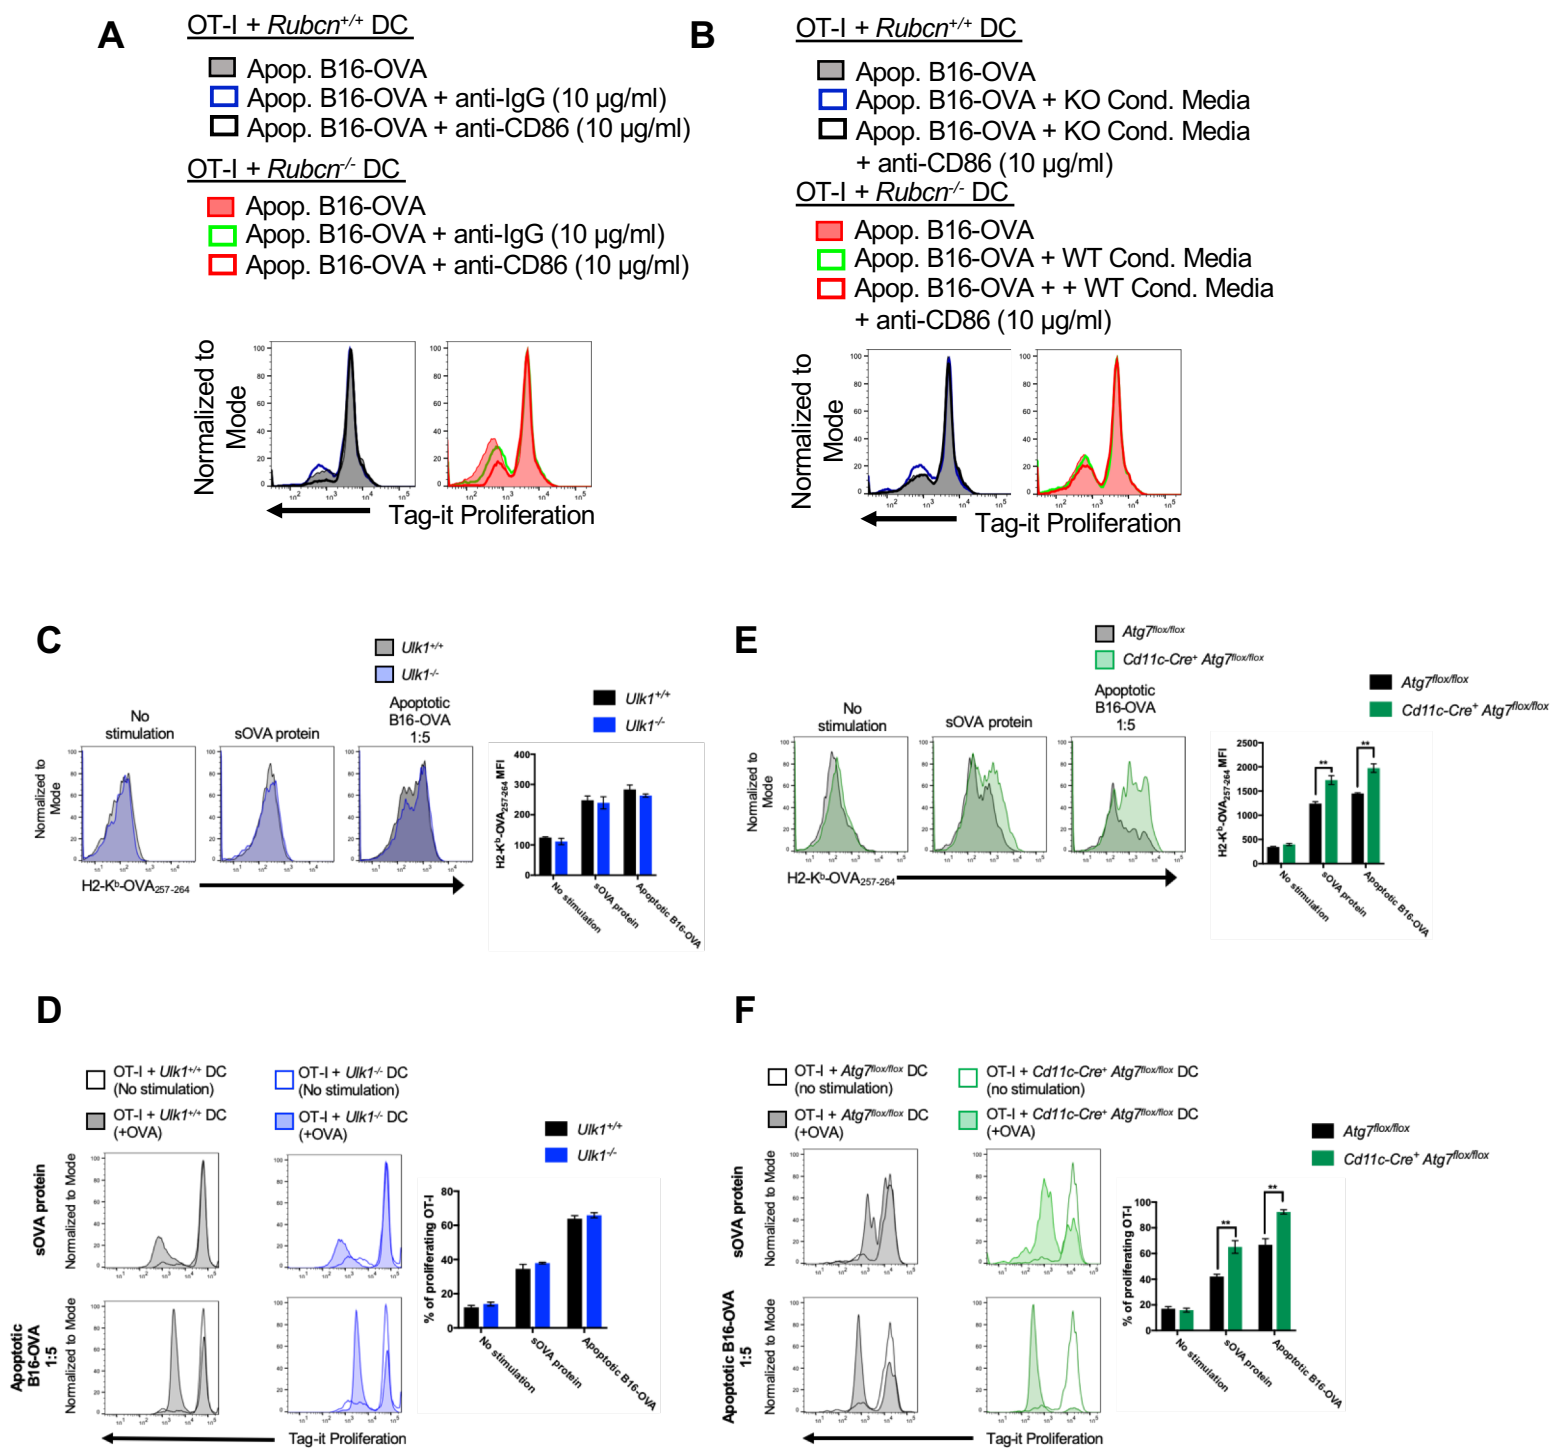

**Figure S3, related to Figures 2 and 3: *Rubcn*<sup>-/-</sup> DCs display increased phagosome-to-cytosol antigen escape and sensitivity to proteasome inhibition.**

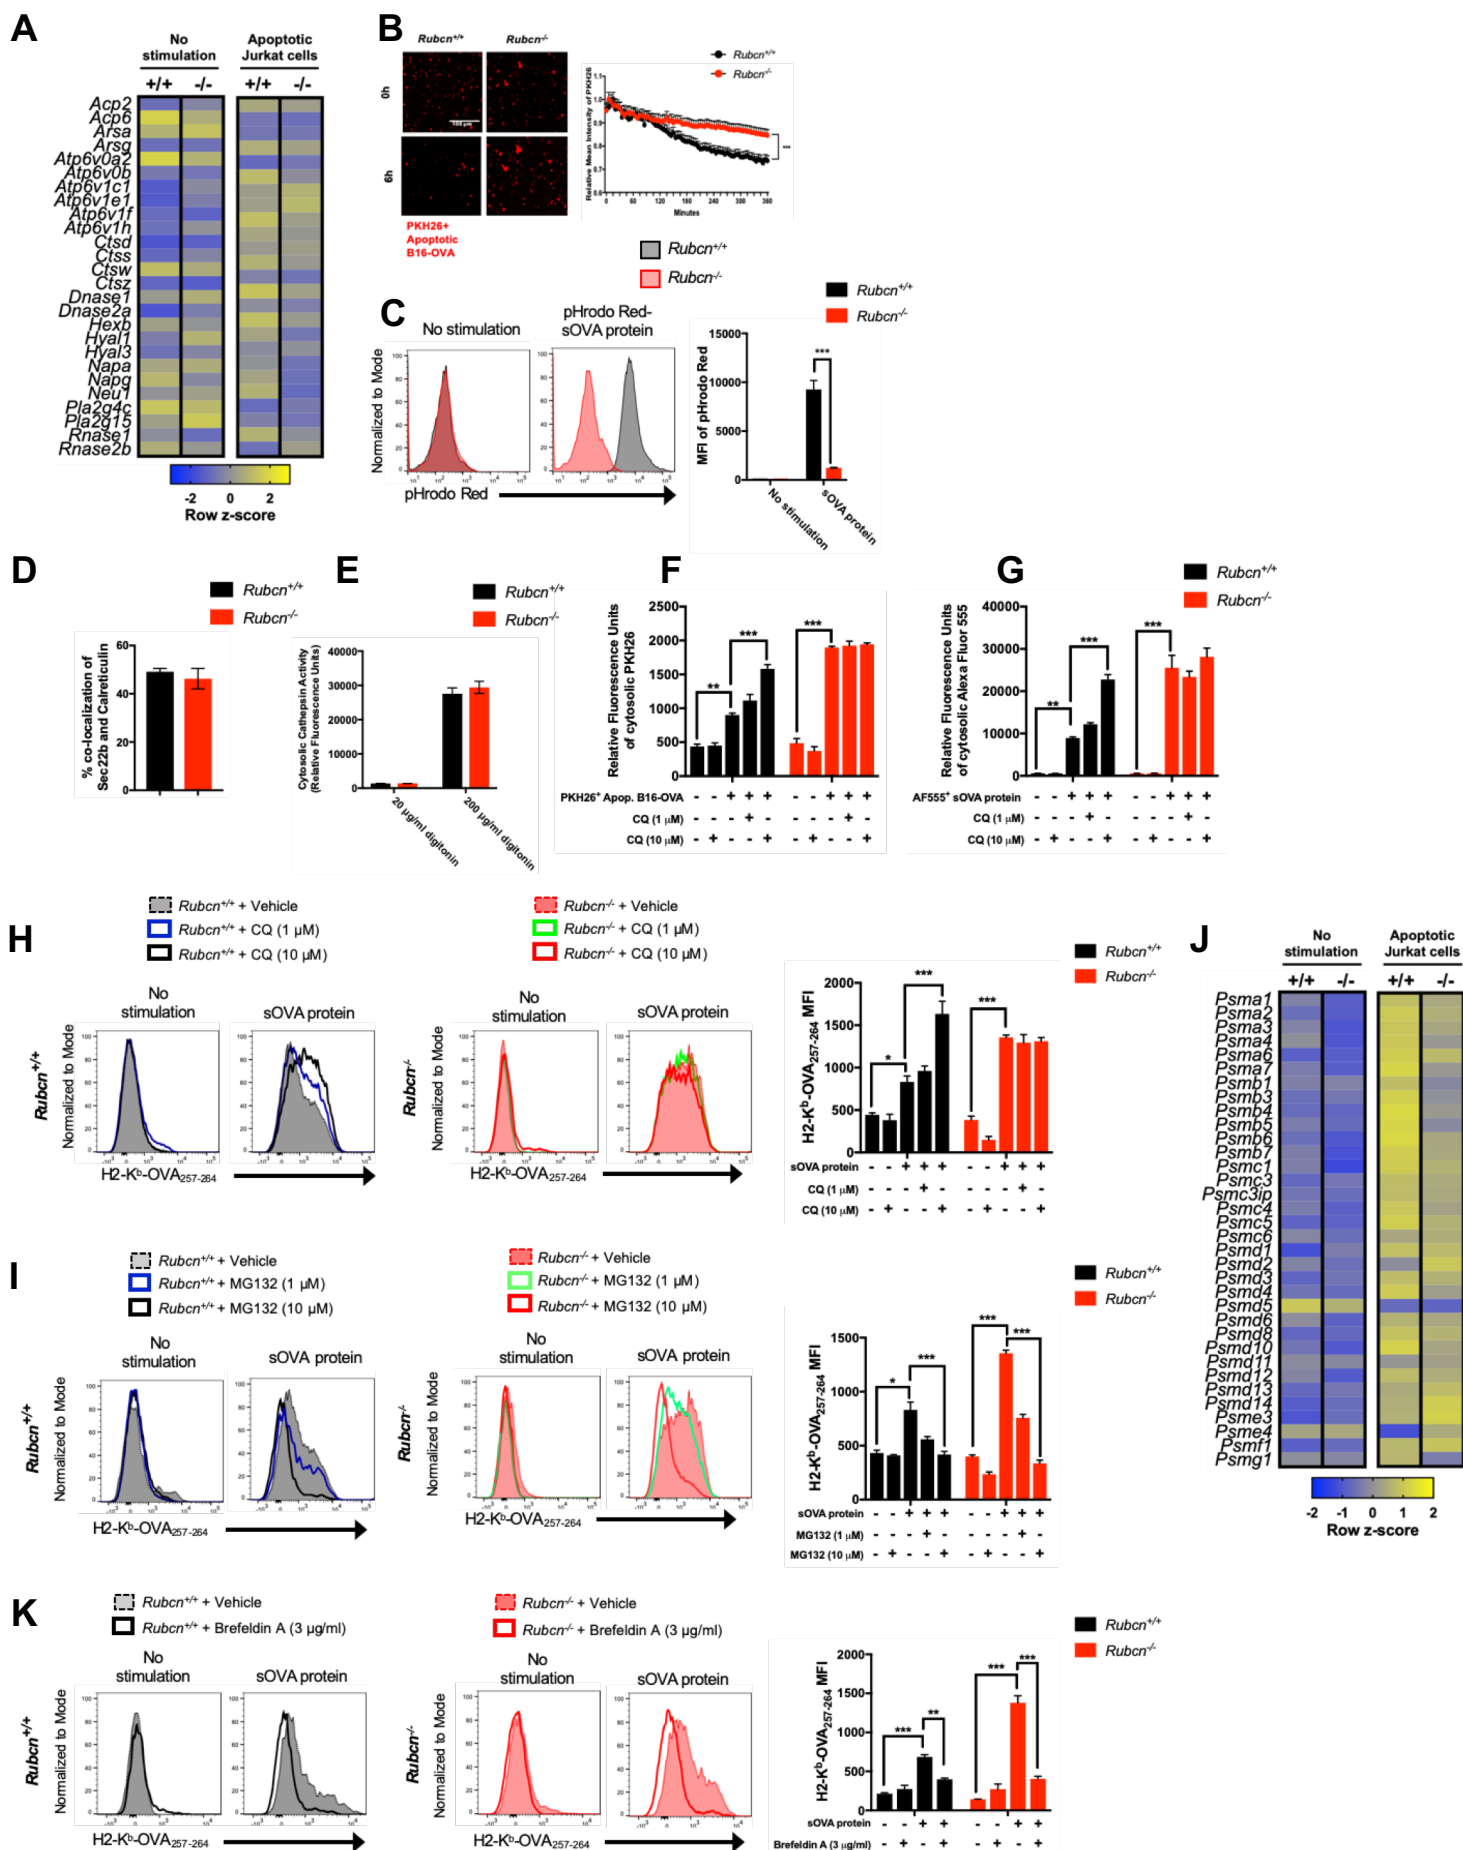

Figure S4, related to Figure 4: *Cd11c-Cre<sup>+</sup> Rubcn<sup>fl/fl</sup>* mice DCs display increased anti-tumor immunity at day 22 *in vivo*.

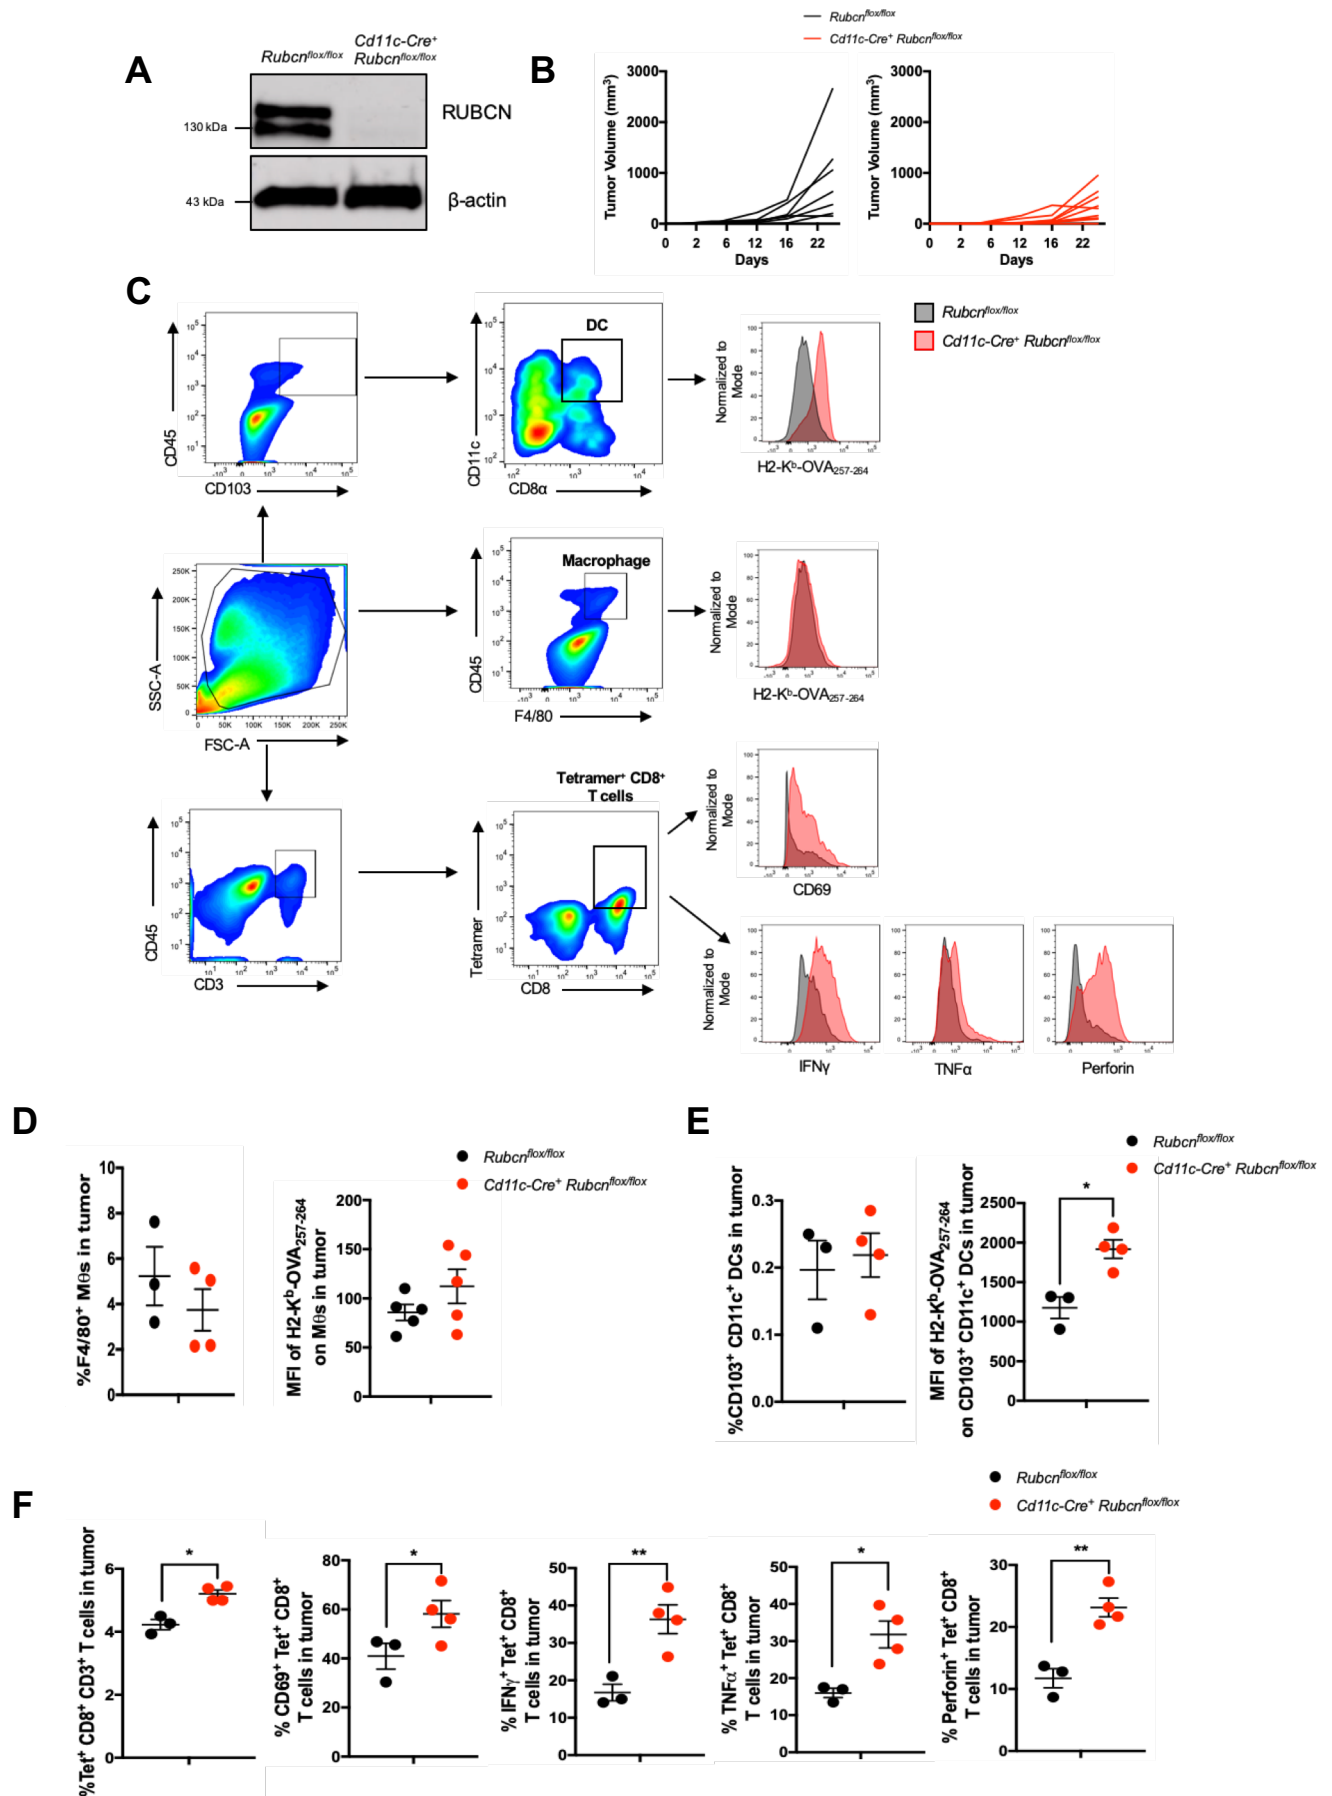

## STAR METHODS

### KEY RESOURCES TABLE

#### REAGENT or RESOURCE

##### Antibodies

Horse radish Peroxidase AffiniPure Goat Anti-Rabbit IgG (H+L)  
TruStain FcX™ (anti-mouse CD16/32) Antibody, Clone: 93  
Goat Anti-mouse AlexaFluor-555  
Anti-Mouse LAMP2 APC, Clone: M3/84  
Anti-RAB5A FITC  
Anti-Mouse Sec22b, Clone: 29-F7  
Anti-RUBCN, Clone: D9F7  
Anti-Actin, Clone: I-19  
Anti-Mouse CD103 PE/Dazzle™ 594, Clone: 2E7  
Anti-Mouse CD45 BV605, Clone: 30-F11  
Anti-Mouse CD8 PE dazzle, Clone: 53-6.7  
Anti-Mouse CD3 PerCP/Cy5.5, Clone: 17A2  
Anti-Calreticulin AlexaFluor-488  
Anti-Mouse CD11c BV421, Clone: N418  
Anti-Mouse CD11b PE/Cy5, Clone: M1/70  
Anti-Mouse F4/80 APC/Cy7, Clone: BM8  
Anti-Mouse CD69 APC, Clone: HI.2F3  
Anti-Mouse CD86 PerCP/Cy5.5, Clone: GL-1  
Anti-Mouse Perforin APC, Clone: S16009B  
Anti-Mouse Granzyme B Pacific Blue™, Clone: GB11  
Anti-Mouse TNF $\alpha$  PE, Clone: MP6-XT22  
Anti-Mouse H-2Kb bound to SIINFEKL PE/Cy7, Clone: 25-D1.16  
Anti-Mouse H-2Kb APC, Clone: AF6-88.5  
Anti-Mouse IFN- $\gamma$  BV510, Clone: XMG1.2  
Anti-Mouse CD11b APC, Clone: N418  
Anti-mouse H-2Kb-OVA<sub>257-264</sub> tetramer  
Purified anti-mouse CD86 antibody, Clone: PO3  
Purified rat IgG2b,  $\kappa$  isotype control antibody, Clone: RTK4530

##### Chemicals, Peptides, and Recombinant Proteins

Polystyrene beads (3 micron)  
OVA<sub>257-264</sub> peptide  
Low endotoxin whole ovalbumin  
Ovalbumin, Alexa Fluor™ 555 Conjugate  
PKH26 Red Fluorescent Cell Linker Kit for General Cell Membrane Labeling  
HBSS, no calcium, no magnesium, no phenol red  
RPMI 1640 Medium  
HEPES  
Glutamax  
0.5 M EDTA, pH 8.0  
PBS  
Fetal Calf Serum (FCS)  
Penicillin-Streptomycin  
2-mercaptoethanol  
DMEM  
Geneticin  
Percoll  
Z-FR-AMC  
IgG-Free, Protease-Free Bovine Serum Albumin (BSA)  
Collagenase D  
Accutase  
Collagenase XI  
Hyaluronidase type I-S  
CCF4  
 $\beta$ -lactamase  
Probenecid  
Chloroquine

MG-132  
DNase I  
4% fixative Image-iT™  
Triton X-100  
Poly-D-Lysine  
DTT  
UltraPure™ DNase/RNase-Free Distilled Water  
Digitonin  
Sodium azide  
Brefeldin A Solution (1000X)  
Phorbol 12-myristate 13-acetate (PMA)  
Ionomycin  
Recombinant FMS-like tyrosine kinase-3 ligand (rFlt3L)  
Amonnia Chloride Solution

---

### Critical Commercial Assays

---

RNeasy Plus Mini Kit  
TRIzol™  
EasySep™ Mouse CD8+ T Cell Isolation Kit  
Mouse Pan-DC Enrichment Kit  
Medium wave UV lamp, 312nm  
TaqMan™ Universal PCR Master Mix  
Fixation/Permeabilization Solution Kit  
LEGEND MAX™ Mouse IFN-β ELISA Kit  
Bio-Plex Pro™ Mouse Cytokine 23-plex Assay  
Tag-it violet Dye  
Zombie UV™ Fixable Viability Kit  
pHrodo Red Microscale Labeling Kit

---

### Experimental Models: Organisms/Strains

---

Mouse: 129S4/SvJaeSor-*Gt(ROSA)26Sor<sup>tm1(FLP1)Dym</sup>*/J, ROSA26::FLPe knock in  
Mouse: B6.Cg-Tg(Itgax-cre)1-1Reiz/J, *CD11cCre<sup>T</sup>*, *Cd11c-Cre*  
Mouse: B6.Cg-Atg7<sup>tm1.1Tchi</sup>, *C57BL/6-Atg7<sup>fllox/fllox</sup>*  
Mouse: *Atg7<sup>fllox/fllox</sup> CD11c-Cre<sup>+</sup>*  
Mouse: *Rubicon<sup>-/-</sup>*, *C57BL/6-Rubcn<sup>em1Dgre</sup>*/J, *Rubcn<sup>-/-</sup>*  
Mouse: *Rubcn<sup>fllox/fllox</sup>*, *B6-Rubcn<sup>tm1a(EUCOMM)Wtsi</sup>*  
Mouse: *CD11c-Cre<sup>+</sup> Rubcn<sup>fllox/fllox</sup>*  
Mouse: B6.129-*Ulk1<sup>tm1Thsn</sup>*/J, *Ulk1<sup>+/+</sup>*, *Ulk1<sup>-/-</sup>*  
Mouse: *C57BL/6-Tg(TcraTcrb)1100Mjb*/J (OT-1 B6)

---

### Cell lines

---

B16-OVA cells  
Jurkat cells

---

### qPCR probes

---

Gene: *Tap1*, Dye: FAM-MGB  
Gene: *Tap2*, Dye: FAM-MGB  
Gene: *B2m*, Dye: FAM-MGB  
Gene: *Rubicon*, Dye: FAM-MGB  
Gene: *Actinb*, Dye: VIC-MGB

---

### Software and Algorithms

---

FlowJo (v.10)  
Prism v.7.0c  
Zen Blue  
BD FACS Diva 8

Partek



Ingenuity Pathway Analysis software

Fiji

**References**

Komatsu, M., et al., Impairment of starvation-induced and constitutive autophagy in Atg7-deficient mice. *J Cell Biol*, 2005. 169(3): p  
Kundu, M., et al., Ulk1 plays a critical role in the autophagic clearance of mitochondria and ribosomes during reticulocyte maturation  
Martinez, J., et al., Molecular characterization of LC3-associated phagocytosis reveals distinct roles for Rubicon, NOX2 and autophag  
Martinez, J., et al., Noncanonical autophagy inhibits the autoinflammatory, lupus-like response to dying cells. *Nature*, 2016. 533(760)

| SOURCE                                      | IDENTIFIER                         |
|---------------------------------------------|------------------------------------|
| Jackson ImmunoResearch Laboratories, INC.   | Cat#: 111-035-144, RRID:AB_2307391 |
| Biologend                                   | Cat #:101319 RRID:AB 1574973       |
| Thermo-Fisher Scientific                    | Cat #:21424, RRID:AB 141780        |
| Biologend                                   | Cat #: 108506, RRID: AB 313387     |
| Abcam                                       | Cat #:ab183454, RRID:N/A           |
| Santa Cruz Biotechnology                    | Cat #: sc-101267; RRID:AB 2186088  |
| Cell Signaling                              | Cat#: 8465; RRID:AB 10891617       |
| Santa Cruz Biotechnology                    | Cat#: sc-1616, RRID:AB 630836      |
| Biologend                                   | Cat #: 121429; RRID: AB 2566492    |
| Biologend                                   | Cat #:103139; RRID:AB 2562341      |
| Biologend                                   | Cat #:100761; RRID:AB 2564026      |
| Biologend                                   | Cat #:100217; RRID:AB 1595597      |
| Abcam                                       | Cat #:ab196158; RRID:N/A           |
| Biologend                                   | Cat #:117343; RRID:AB 2563099      |
| Biologend                                   | Cat #:101209; RRID:AB 312792       |
| Biologend                                   | Cat #:123117; RRID:AB 893489       |
| Biologend                                   | Cat #:104514; RRID:AB 492843       |
| Biologend                                   | Cat #:105028, RRID: AB 2074994     |
| Biologend                                   | Cat #:154404 RRID:AB 2721465       |
| Biologend                                   | Cat #:515408 ; RRID:AB_2562196     |
| Biologend                                   | Cat #:506306; RRID:AB 315427       |
| Biologend                                   | Cat #: 141608; RRID:AB 11218593    |
| Biologend                                   | Cat #: 116518; RRID:AB 10564404    |
| Biologend                                   | Cat #:505841; RRID:AB 2562187      |
| Biologend                                   | Cat #:117310 ; RRID:AB 313779      |
| NIH Tetramer Core Facility                  | N/A                                |
| Biologend                                   | Cat #: 105102, RRID:AB 313155      |
| Biologend                                   | Cat #: 400602, RRID: AB 326546     |
| Polysciences                                | Cat#: 17134                        |
| Invivogen                                   | Cat#: vac-sin                      |
| Worthington Biochemical                     | Cat#: LS003061                     |
| Life Technologies/ Thermo Fisher Scientific | Cat#: O34782                       |
| Sigma-Aldrich                               | Cat#:PKH26GL-1KT                   |
| Life Technologies/ Thermo Fisher Scientific | Cat#:14175095                      |
| Life Technologies/ Thermo Fisher Scientific | Cat#:11875093                      |
| Life Technologies/ Thermo Fisher Scientific | Cat#:15630080                      |
| Life Technologies/ Thermo Fisher Scientific | Cat#: 35050061                     |
| Gibco                                       | Cat #:15575-038                    |
| Gibco                                       | Cat#:10010023                      |
| HyClone                                     | Cat#:SH3007303                     |
| Life Technologies/ Thermo Fisher Scientific | Cat#: 15140122                     |
| Life Technologies/ Thermo Fisher Scientific | Cat#: 21985023                     |
| Life Technologies/ Thermo Fisher Scientific | Cat#: 11965118                     |
| Life Technologies/ Thermo Fisher Scientific | Cat#: 10131027                     |
| GE Healthcare                               | Cat#: 17089101                     |
| AnaSpec                                     | Cat#:AS-24096                      |
| Jackson ImmunoResearch Laboratories, INC.   | Cat#:001-000-162                   |
| Roche                                       | Cat#: 11088858001                  |
| Life Technologies/ Thermo Fisher Scientific | Cat#:A1110501                      |
| Sigma-Aldrich                               | Cat#:C7657-25MG                    |
| Sigma-Aldrich                               | Cat#:H3506-100MG                   |
| Life Technologies/ Thermo Fisher Scientific | Cat#: K1030                        |
| Sigma-Aldrich                               | Cat#: L6170                        |
| Sigma-Aldrich                               | Cat#: P8761                        |
| Sigma-Aldrich                               | Cat#: C6628                        |

|                                             |                 |
|---------------------------------------------|-----------------|
| Sigma-Aldrich                               | Cat#: 474790    |
| Roche                                       | Cat#:3724778103 |
| Life Technologies/ Thermo Fisher Scientific | Cat#:R37814     |
| Sigma-Aldrich                               | Cat#:X100       |
| Sigma-Aldrich                               | Cat#:P4832      |
| Sigma-Aldrich                               | Cat#:DTT-RO     |
| Life Technologies/ Thermo Fisher Scientific | Cat#:10977015   |
| Sigma-Aldrich                               | Cat#:D141       |
| Sigma-Aldrich                               | Cat#: S2002     |
| Life Technologies/ Thermo Fisher Scientific | Cat#:00-4506-51 |
| Sigma-Aldrich                               | Cat#:P8139      |
| Sigma-Aldrich                               | Cat#:I0634      |
| NIEHS Protein Expression Core               | N/A             |
| STEMCELL technologies                       | Cat#: 07800     |

|                                             |                                  |
|---------------------------------------------|----------------------------------|
| QIAGEN                                      | Cat#:74134                       |
| Life Technologies/ Thermo Fisher Scientific | Cat#:15596026                    |
| STEMCELL technologies                       | Cat#:19853                       |
| STEMCELL technologies                       | Cat#: 19763                      |
| Spectroline                                 | Cat#: 1981172 csa22.2 No. 1010-1 |
| Life Technologies/ Thermo Fisher Scientific | Cat#:4364338                     |
| Becton Dickinson                            | Cat#:554714                      |
| Biologend                                   | Cat#: 439407                     |
| Bio-Rad                                     | Cat#: M60009RDPD                 |
| Biologend                                   | Cat #:425101                     |
| Biologend                                   | Cat #:423107                     |
| Life Technologies/ Thermo Fisher Scientific | Cat#: P35363                     |

|                                           |                    |
|-------------------------------------------|--------------------|
| JAX                                       | Strain #: 3946     |
| JAX                                       | Strain #:008068    |
| Komatsu M, <i>et al.</i> , 2005/RIKEN BRC | Strain #:RBRC02759 |
| Martinez <i>et al.</i> , 2016             | N/A                |
| Martinez <i>et al.</i> , 2015 /JAX        | Strain #:032581    |
| This manuscript                           | N/A                |
| This manuscript                           | N/A                |
| Kundu <i>et al.</i> , 2008, JAX           | Strain #:17976     |
| JAX                                       | Stain#: 003831     |

|                                       |     |
|---------------------------------------|-----|
| University of Washington (Oberst lab) | N/A |
| NIEHS (Fessler lab)                   | N/A |

|                                             |                                        |
|---------------------------------------------|----------------------------------------|
| Life Technologies/ Thermo Fisher Scientific | Cat# 4448892, Assay ID#: Mm00443188_m1 |
| Life Technologies/ Thermo Fisher Scientific | Cat# 4331182, Assay ID#: Mm01277033_m1 |
| Life Technologies/ Thermo Fisher Scientific | Cat#4331182, Assay ID#: Mm00437762_m1  |
| Life Technologies/ Thermo Fisher Scientific | Cat#4351372, Assay ID#: Mm01170688_g1  |
| Life Technologies/ Thermo Fisher Scientific | Cat#4448489, Assay ID#: Mm02619580_g1  |

|                                |                                                                                                                                                                                                                                                                           |
|--------------------------------|---------------------------------------------------------------------------------------------------------------------------------------------------------------------------------------------------------------------------------------------------------------------------|
| TreeStar                       | <a href="https://www.flowjo.com/solutions/flowjo/downloads">https://www.flowjo.com/solutions/flowjo/downloads</a>                                                                                                                                                         |
| Graph Pad                      | <a href="https://www.graphpad.com/demos">https://www.graphpad.com/demos</a>                                                                                                                                                                                               |
| Zeiss                          | <a href="https://www.zeiss.com/microscopy/us/products/microscopy">https://www.zeiss.com/microscopy/us/products/microscopy</a>                                                                                                                                             |
| BD Biosciences                 | <a href="http://www.bdbiosciences.com/us/instruments/clinical/software/flowcytometry-acquisition/bd-facsdivasoftware/m/333333/overview">http://www.bdbiosciences.com/us/instruments/clinical/software/flowcytometry-acquisition/bd-facsdivasoftware/m/333333/overview</a> |
| Partek genomics suite software | <a href="http://www.partek.com/partek-genomics-suite/">http://www.partek.com/partek-genomics-suite/</a>                                                                                                                                                                   |

Qiagen  
Image J

<https://www.qiagenbioinformatics.com/products/inger>  
<https://imagej.net/Fiji/Downloads>

425-34.

. Blood, 2008. 112(4): p. 1493-502.

y proteins. Nat Cell Biol, 2015. 17(7): p. 893-906.

01): p. 115-9.



[scope-software/zen.html](#)

[unity-pathway-analysis/](#)
